# Supplementary material
Source: PubMed Central journal article supplement (PMC2788055)

## Supporting Information

### **From Imide to Lactam Metallo-Pyridocarbazoles: Distinct Scaffolds for the Design of Selective Protein Kinase Inhibitors**

*Nicholas Pagano,<sup>a,c</sup> Eric Y. Wong,<sup>b</sup> Tom Breiding,<sup>a</sup> Haidong Liu,<sup>a,d</sup> Alexander Wilbuer,<sup>a</sup>  
Howard Bregman,<sup>c</sup> Qi Shen,<sup>d</sup> Scott L. Diamond,<sup>b</sup> and Eric Meggers<sup>\*a</sup>*

<sup>a</sup> Fachbereich Chemie, Philipps-Universität Marburg, Hans-Meerwein-Strasse, 35032 Marburg, Germany; <sup>b</sup> Institute of Medicine and Engineering, University of Pennsylvania, Philadelphia, PA 19104, USA; <sup>c</sup> Department of Chemistry, University of Pennsylvania, 231 S. 34<sup>th</sup> Street, Philadelphia, PA 19104, USA; <sup>d</sup> Key Laboratory of Organic Synthesis of Jiangsu Province, Department of Chemistry and Chemical Engineering, Dushu Lake Campus, Suzhou University, Suzhou 215123, P. R. China

Email: meggers@chemie.uni-marburg.de

### **Content**

- A) Screening of **1-3** and (*R*<sub>Ru</sub>)-**21** Against Human Protein Kinase Panel: S2-S7
- B) Assignment of the Absolute Configurations of (*R*<sub>Ru</sub>)-**1**, (*S*<sub>Ru</sub>)-**1**, (*R*<sub>Ru</sub>)-**2**, (*S*<sub>Ru</sub>)-**2**, (*R*<sub>Ru</sub>)-**21**, and (*S*<sub>Ru</sub>)-**21**: S8-S10
- C) ROESY Analysis of Compound **17**: S11
- D) NMR Spectra: S12-S51

### A) Screening of 1-3 (racemic) and (*R*<sub>Ru</sub>)-21 Against Human Protein Kinase Panel

Millipore KinaseProfiler: Remaining kinase activities in percent at a single concentration of **1** (100 nM), **2** (100 nM), **3** (30 nM), and (*R*<sub>Ru</sub>)-**21** (100 nM) at 10 μM ATP. Measurements were performed in duplicate and the average taken. Activities below 20% are highlighted in yellow; n.d. = not determined.

|                      | <b>3 @ 30 nM</b> | <b>1 @ 100 nM</b> | <b>2 @ 100 nM</b> | <b>(<i>R</i><sub>Ru</sub>)-21 @ 100nM</b> |
|----------------------|------------------|-------------------|-------------------|-------------------------------------------|
| Abl(h)               | 95               | 102               | 107               | 95                                        |
| Abl (H396P) (h)      | 100              | 99                | 98                | n.d.                                      |
| Abl (M351T)(h)       | 100              | 100               | 98                | n.d.                                      |
| Abl (Q252H) (h)      | 91               | 98                | 96                | n.d.                                      |
| Abl(T315I)(h)        | 108              | 110               | 108               | n.d.                                      |
| Abl(Y253F)(h)        | 104              | 108               | 96                | n.d.                                      |
| ACK1(h)              | 35               | 10                | 25                | 43                                        |
| ALK(h)               | 61               | 37                | 81                | 108                                       |
| ALK4(h)              | 118              | 121               | 128               | 91                                        |
| Arg(h)               | 102              | 88                | 98                | 87                                        |
| ARK5(h)              | 89               | 31                | 56                | 95                                        |
| ASK1(h)              | 109              | 104               | 108               | 119                                       |
| Aurora-A(h)          | 112              | 119               | 118               | 55                                        |
| Aurora-B(h)          | n.d.             | n.d.              | n.d.              | 94                                        |
| Axl(h)               | 86               | 92                | 72                | 78                                        |
| Bmx(h)               | 97               | 94                | 99                | 51                                        |
| BRK(h)               | 110              | 112               | 100               | 102                                       |
| BrSK1(h)             | 97               | 99                | 86                | 109                                       |
| BrSK2(h)             | 82               | 100               | 87                | 88                                        |
| BTK(h)               | 77               | 59                | 79                | 44                                        |
| BTK(R28H)(h)         | 125              | 110               | 109               | n.d.                                      |
| CaMKI(h)             | 104              | 100               | 113               | 104                                       |
| CaMKIIβ(h)           | 65               | 36                | 70                | 106                                       |
| CaMKIIγ(h)           | 14               | 6                 | 64                | 97                                        |
| CaMKIδ(h)            | 95               | 104               | 104               | 112                                       |
| CaMKIIδ(h)           | 20               | 5                 | 73                | 100                                       |
| CaMKIV(h)            | 77               | 81                | 66                | 100                                       |
| CDK1/cyclinB(h)      | 74               | 105               | 89                | 95                                        |
| CDK2/cyclinA(h)      | 75               | 108               | 97                | 74                                        |
| CDK2/cyclinE(h)      | 36               | 86                | 87                | 58                                        |
| CDK3/cyclinE(h)      | 90               | 115               | 82                | 103                                       |
| CDK5/p25(h)          | 51               | 96                | 54                | 74                                        |
| CDK5/p35(h)          | 57               | 95                | 50                | 89                                        |
| CDK6/cyclinD3(h)     | n.d.             | n.d.              | n.d.              | 94                                        |
| CDK7/cyclinH/MAT1(h) | 109              | 113               | 99                | 102                                       |
| CDK9/cyclin T1(h)    | 32               | 47                | 35                | 22                                        |
| CHK1(h)              | 95               | 116               | 90                | 97                                        |
| CHK2(h)              | 88               | 87                | 70                | 95                                        |
| CHK2(I157T)(h)       | 91               | 91                | 68                | n.d.                                      |
| CHK2(R145W)(h)       | 94               | 94                | 68                | n.d.                                      |
| CK1γ1(h)             | 61               | 99                | 44                | 94                                        |
| CK1γ2(h)             | 38               | 100               | 28                | 76                                        |

|                      |     |     |     |      |
|----------------------|-----|-----|-----|------|
| CK1γ3(h)             | 59  | 114 | 17  | 104  |
| CK1δ(h)              | 33  | 100 | 14  | 99   |
| CK2(h)               | 110 | 111 | 105 | 106  |
| CK2α2(h)             | 115 | 109 | 109 | 110  |
| CLK2(h)              | 4   | 26  | 1   | 50   |
| CLK3(h)              | 105 | 100 | 86  | 100  |
| cKit(h)              | 108 | 112 | 113 | 100  |
| cKit(D816V)(h)       | 104 | 106 | 106 | n.d. |
| cKit(D816H)(h)       | 42  | 84  | 69  | n.d. |
| cKit(V560G)(h)       | 69  | 76  | 91  | n.d. |
| cKit(V654A)(h)       | 67  | 93  | 101 | n.d. |
| CSK(h)               | 118 | 110 | 121 | 99   |
| c-RAF(h)             | 100 | 100 | 92  | 89   |
| cSRC(h)              | 74  | 62  | 94  | 68   |
| DAPK1(h)             | 55  | 70  | 69  | 102  |
| DAPK2(h)             | 46  | 92  | 81  | 89   |
| DCAMKL2(h)           | 95  | 105 | 104 | 0    |
| DDR2(h)              | 93  | 96  | 86  | 116  |
| DMPK(h)              | 115 | 110 | 113 | 99   |
| DRAK1(h)             | 88  | 89  | 94  | 113  |
| DYRK2(h)             | 89  | 108 | 42  | 112  |
| eEF-2K(h)            | 106 | 110 | 106 | 110  |
| EGFR(h)              | 115 | 119 | 113 | 91   |
| EGFR(L858R)(h)       | 66  | 100 | 49  | n.d. |
| EGFR(L861Q)(h)       | 97  | 101 | 84  | n.d. |
| EGFR(T790M)(h)       | 54  | 92  | 26  | n.d. |
| EGFR(T790M,L858R)(h) | 19  | 56  | 6   | n.d. |
| EphA1(h)             | 104 | 95  | 103 | 102  |
| EphA2(h)             | 99  | 105 | 99  | 99   |
| EphA3(h)             | 110 | 110 | 117 | 105  |
| EphA4(h)             | 112 | 109 | 110 | 113  |
| EphA5(h)             | 135 | 135 | 129 | 99   |
| EphA7(h)             | 113 | 118 | 101 | 92   |
| EphA8(h)             | 133 | 127 | 114 | 109  |
| EphB2(h)             | 110 | 100 | 106 | 103  |
| EphB1(h)             | 110 | 120 | 90  | 77   |
| EphB3(h)             | 114 | 107 | 95  | 73   |
| EphB4(h)             | 107 | 116 | 120 | 108  |
| ErbB4(h)             | 106 | 120 | 103 | 95   |
| FAK(h)               | 110 | 70  | 101 | 102  |
| Fer(h)               | 88  | 92  | 83  | 72   |
| Fes(h)               | 92  | 100 | 94  | 91   |
| FGFR1(h)             | 101 | 119 | 105 | 56   |
| FGFR1(V561M)(h)      | 107 | 84  | 117 | n.d. |
| FGFR2(h)             | 95  | 112 | 127 | 94   |
| FGFR2(N549H)(h)      | 80  | 97  | 102 | n.d. |
| FGFR3(h)             | 94  | 96  | 96  | 105  |
| FGFR4(h)             | 103 | 110 | 105 | 107  |
| Fgr(h)               | 81  | 67  | 92  | 73   |
| Flt1(h)              | 28  | 46  | 37  | 63   |
| Flt3(D835Y)(h)       | 4   | 1   | 13  | n.d. |
| Flt3(h)              | 18  | 10  | 27  | 29   |

|                      |      |      |      |     |
|----------------------|------|------|------|-----|
| Flt4(h)              | 41   | 23   | 36   | 32  |
| Fms(h)               | 60   | 61   | 90   | 100 |
| Fyn(h)               | 60   | 45   | 89   | 64  |
| GCK(h)               | 90   | 73   | 57   | 73  |
| GRK5(h)              | 106  | 100  | 107  | 113 |
| GRK6(h)              | 100  | 109  | 94   | 121 |
| GRK7(h)              | 98   | 100  | 46   | 93  |
| GSK3 $\alpha$ (h)    | 0    | 70   | 42   | 36  |
| GSK3 $\beta$ (h)     | 7    | 86   | 59   | 61  |
| Haspin(h)            | 27   | 12   | 7    | 69  |
| Hck(h)               | 60   | 50   | 79   | 63  |
| Hck(h), activated    | n.d. | n.d. | n.d. | 65  |
| HIPK1(h)             | 14   | 82   | 12   | 84  |
| HIPK2(h)             | 8    | 61   | 6    | 69  |
| HIPK3(h)             | 13   | 82   | 6    | 100 |
| IGF-1R(h)            | 85   | 83   | 96   | 92  |
| IGF-1R(h), activated | 102  | 100  | 105  | 92  |
| IKK $\alpha$ (h)     | 109  | 113  | 109  | 97  |
| IKK $\beta$ (h)      | 86   | 94   | 83   | 111 |
| IR(h)                | 102  | 96   | 100  | 99  |
| IR(h), activated     | 103  | 97   | 104  | 91  |
| IRR(h)               | 66   | 96   | 37   | 86  |
| IRAK1(h)             | 93   | 90   | 81   | 98  |
| IRAK4(h)             | 72   | 72   | 25   | 40  |
| Itk(h)               | 84   | 82   | 80   | 32  |
| JAK2(h)              | 85   | 28   | 60   | 70  |
| JAK3(h)              | 79   | 65   | 69   | 76  |
| JNK1 $\alpha$ 1(h)   | 107  | 105  | 105  | 111 |
| JNK2 $\alpha$ 2(h)   | 100  | 95   | 100  | 99  |
| JNK3(h)              | 103  | 90   | 100  | 115 |
| KDR(h)               | 73   | 67   | 47   | 86  |
| Lck(h)               | 90   | 77   | 88   | 90  |
| Lck(h), activated    | n.d. | n.d. | n.d. | 105 |
| LIMK1(h)             | 95   | 99   | 71   | 95  |
| LKB1(h)              | 103  | 102  | 102  | 108 |
| LOK(h)               | 84   | 74   | 45   | 81  |
| Lyn(h)               | 33   | 34   | 89   | 60  |
| MAPK1(h)             | 100  | 115  | 98   | 105 |
| MAPK2(h)             | 110  | 108  | 109  | 95  |
| MAPKAP-K2(h)         | 110  | 107  | 105  | 106 |
| MAPKAP-K3(h)         | 109  | 111  | 114  | 104 |
| MEK1(h)              | 103  | 104  | 96   | 71  |
| MARK1(h)             | 59   | 81   | 85   | 51  |
| MELK(h)              | 29   | 43   | 6    | 70  |
| Mer(h)               | 24   | 53   | 30   | 58  |
| Met(h)               | 112  | 113  | 101  | 99  |
| MINK(h)              | 68   | 57   | 52   | 41  |
| MKK6(h)              | 114  | 114  | 121  | 94  |
| MKK7 $\beta$ (h)     | 72   | 65   | 70   | 96  |
| MLCK(h)              | 5    | 4    | 6    | 26  |
| MLK1(h)              | 57   | 31   | 26   | 20  |
| Mnk2(h)              | 92   | 93   | 89   | 98  |

|                           |     |     |     |      |
|---------------------------|-----|-----|-----|------|
| MRCK $\alpha$ (h)         | 110 | 106 | 97  | 100  |
| MRCK $\beta$ (h)          | 94  | 95  | 106 | 103  |
| MSK1(h)                   | 83  | 87  | 73  | 126  |
| MSK2(h)                   | 75  | 102 | 69  | 102  |
| MSSK1(h)                  | 105 | 107 | 106 | 117  |
| MST1(h)                   | 63  | 50  | 50  | 31   |
| MST2(h)                   | 52  | 43  | 20  | 26   |
| MST3(h)                   | 40  | 103 | 204 | 81   |
| mTOR(h)                   | 102 | 85  | 96  | 113  |
| mTOR/FKBP12(h)            | 111 | 104 | 96  | 103  |
| MuSK(h)                   | 107 | 106 | 117 | 105  |
| NEK2(h)                   | 95  | 98  | 100 | 57   |
| NEK3(h)                   | 94  | 95  | 97  | 97   |
| NEK6(h)                   | 104 | 110 | 104 | 111  |
| NEK7(h)                   | 99  | 100 | 93  | 105  |
| NEK11(h)                  | 6   | 18  | 45  | 69   |
| NLK(h)                    | 97  | 94  | 87  | 43   |
| p70S6K(h)                 | 81  | 105 | 67  | 100  |
| PAK2(h)                   | 95  | 98  | 85  | 70   |
| PAK3(h)                   | 118 | 99  | 93  | 51   |
| PAK4(h)                   | 82  | 85  | 85  | 52   |
| PAK5(h)                   | 44  | 69  | 68  | 29   |
| PAK6(h)                   | 69  | 90  | 81  | 58   |
| PAR-1B $\alpha$ (h)       | 33  | 47  | 66  | 55   |
| PASK(h)                   | 39  | 117 | 15  | 103  |
| PDGFR $\alpha$ (h)        | 107 | 98  | 110 | 106  |
| PDGFR $\alpha$ (D842V)(h) | 21  | 67  | 41  | n.d. |
| PDGFR $\alpha$ (V561D)(h) | 40  | 56  | 53  | n.d. |
| PDGFR $\beta$ (h)         | 108 | 105 | 104 | 113  |
| PDK1(h)                   | 87  | 98  | 74  | 101  |
| PhK $\gamma$ 2(h)         | 112 | 85  | 58  | 100  |
| Pim-1(h)                  | 1   | 6   | 2   | 20   |
| Pim-2(h)                  | -1  | 27  | 8   | 84   |
| Pim-3(h)                  | 20  | 92  | 64  | 85   |
| PKA(h)                    | 83  | 96  | 74  | 83   |
| PKB $\alpha$ (h)          | 90  | 101 | 84  | 116  |
| PKB $\beta$ (h)           | 103 | 101 | 97  | 110  |
| PKB $\gamma$ (h)          | 83  | 110 | 93  | 95   |
| PKC $\alpha$ (h)          | 109 | 111 | 101 | 96   |
| PKC $\beta$ I(h)          | 65  | 101 | 48  | 99   |
| PKC $\beta$ II(h)         | 89  | 89  | 97  | 100  |
| PKC $\gamma$ (h)          | 105 | 102 | 100 | 102  |
| PKC $\delta$ (h)          | 98  | 101 | 95  | 94   |
| PKC $\epsilon$ (h)        | 88  | 96  | 87  | 100  |
| PKC $\eta$ (h)            | 89  | 113 | 108 | 108  |
| PKC $\iota$ (h)           | 98  | 87  | 100 | 98   |
| PKC $\mu$ (h)             | 111 | 107 | 101 | 98   |
| PKC $\theta$ (h)          | 32  | 87  | 52  | 111  |
| PKC $\zeta$ (h)           | 111 | 113 | 109 | 100  |
| PKD2(h)                   | 106 | 102 | 101 | 102  |
| PKG1 $\alpha$ (h)         | 30  | 50  | 3   | 88   |
| PKG1 $\beta$ (h)          | 29  | 54  | 2   | 85   |

|                  |     |     |     |      |
|------------------|-----|-----|-----|------|
| Plk1(h)          | 104 | 102 | 88  | 90   |
| Plk3(h)          | 105 | 109 | 105 | 99   |
| PRAK(h)          | 83  | 85  | 80  | 76   |
| PRK2(h)          | 50  | 48  | 30  | 16   |
| PrKX(h)          | 68  | 84  | 32  | 103  |
| PTK5(h)          | 84  | 75  | 72  | 78   |
| Pyk2(h)          | 79  | 76  | 51  | 95   |
| Ret(h)           | 38  | 38  | 42  | 12   |
| Ret (V804L)(h)   | 65  | 50  | 36  | n.d. |
| Ret(V804M)(h)    | 43  | 19  | 21  | n.d. |
| RIPK2(h)         | 92  | 93  | 86  | 85   |
| ROCK-I(h)        | 103 | 111 | 105 | 75   |
| ROCK-II(h)       | 102 | 86  | 64  | 61   |
| Ron(h)           | 103 | 114 | 101 | 114  |
| Ros(h)           | 107 | 102 | 97  | 105  |
| Rse(h)           | 39  | 37  | 90  | 128  |
| Rsk1(h)          | 14  | 80  | 9   | 21   |
| Rsk2(h)          | 40  | 81  | 40  | 37   |
| Rsk3(h)          | 30  | 97  | 41  | 28   |
| Rsk4(h)          | 21  | 81  | 15  | 27   |
| SAPK2a(h)        | 118 | 113 | 110 | 96   |
| SAPK2a(T106M)(h) | 110 | 108 | 104 | n.d. |
| SAPK2b(h)        | 105 | 100 | 101 | 107  |
| SAPK3(h)         | 120 | 112 | 93  | 102  |
| SAPK4(h)         | 105 | 104 | 73  | 102  |
| SGK(h)           | 86  | 96  | 84  | 102  |
| SGK2(h)          | 100 | 108 | 91  | 103  |
| SGK3(h)          | 96  | 108 | 93  | 107  |
| SIK(h)           | 48  | 38  | 94  | 98   |
| Snk(h)           | 103 | 108 | 92  | 111  |
| Src(1-530)(h)    | 65  | 55  | 102 | n.d. |
| Src(T341M)(h)    | 71  | 53  | 76  | n.d. |
| SRPK1(h)         | 107 | 99  | 105 | 113  |
| SRPK2(h)         | 122 | 107 | 104 | 102  |
| STK33(h)         | 98  | 76  | 64  | 93   |
| Syk(h)           | 99  | 105 | 90  | 67   |
| TAK1(h)          | 110 | 111 | 106 | 93   |
| TAO1(h)          | 92  | 101 | 43  | 84   |
| TAO2(h)          | 82  | 96  | 72  | 92   |
| TAO3(h)          | 83  | 102 | 49  | 80   |
| TBK1(h)          | 79  | 88  | 67  | 99   |
| Tec(h) activated | 55  | 36  | 90  | 20   |
| Tie2(h)          | 97  | 116 | 103 | 39   |
| Tie2(R849W)(h)   | 103 | 87  | 87  | n.d. |
| Tie2(Y897S)(h)   | 112 | 99  | 92  | n.d. |
| TLK2(h)          | 114 | 108 | 108 | 103  |
| TrkA(h)          | 22  | 5   | 5   | 4    |
| TrkB(h)          | 54  | 9   | 16  | 2    |
| TSSK1(h)         | 93  | 86  | 72  | 93   |
| TSSK2(h)         | 97  | 102 | 96  | 110  |
| Txk(h)           | 57  | 34  | 73  | 16   |
| ULK2(h)          | 103 | 101 | 100 | 106  |

|           |     |     |     |     |
|-----------|-----|-----|-----|-----|
| ULK3(h)   | 106 | 106 | 114 | 93  |
| WNK2(h)   | 79  | 92  | 84  | 91  |
| WNK3(h)   | 95  | 94  | 99  | 98  |
| VRK2(h)   | 99  | 110 | 96  | 109 |
| Yes(h)    | 71  | 75  | 102 | 68  |
| ZAP-70(h) | 129 | 122 | 130 | 111 |
| ZIPK(h)   | 52  | 87  | 77  | 126 |

## B) Assignment of the Absolute Configurations of (*R*<sub>Ru</sub>)-1, (*S*<sub>Ru</sub>)-1, (*R*<sub>Ru</sub>)-2, (*S*<sub>Ru</sub>)-2, (*R*<sub>Ru</sub>)-21, and (*S*<sub>Ru</sub>)-21

All compounds were measured at a concentration of 1 mM in DMSO. The CD-spectra of the pure enantiomers were compared with reference half sandwich compounds. See for example:

- 1.) J. É. Debreczeni, A. N. Bullock, G. E. Atilla, D. S. Williams, H. Bregman, S. Knapp, E. Meggers, *Angew. Chem. Int. Ed.* **2006**, *45*, 1580-1585.
- 2.) G. E. Atilla, D. S. Williams, H. Bregman, N. Pagano, E. Meggers, *ChemBioChem* **2006**, 1443-1450.

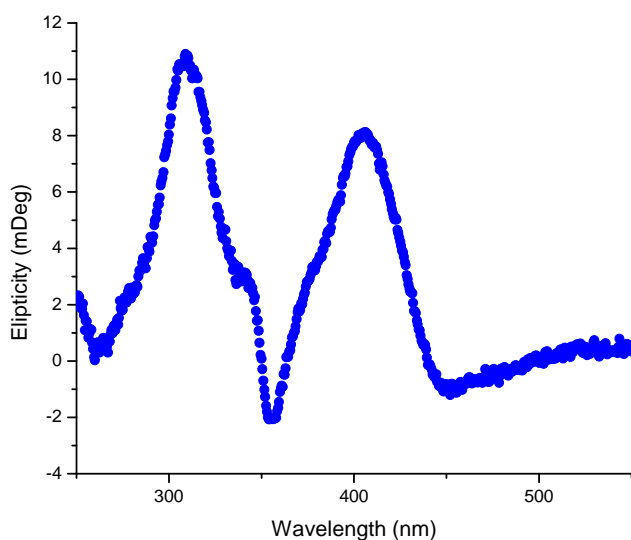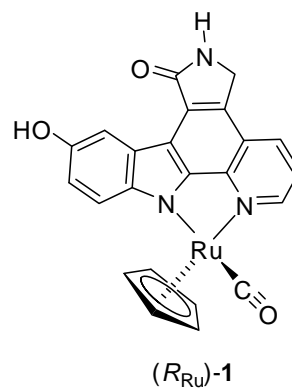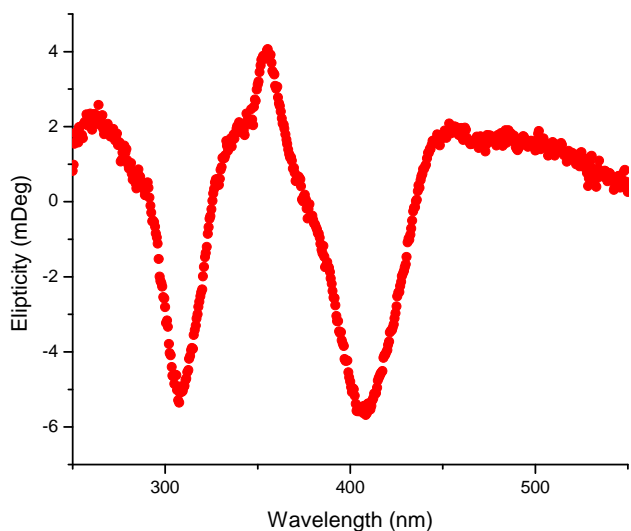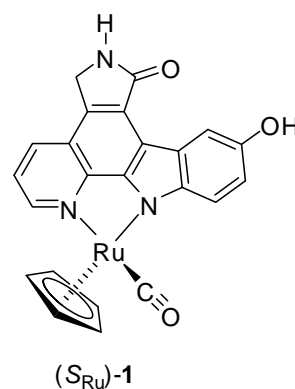



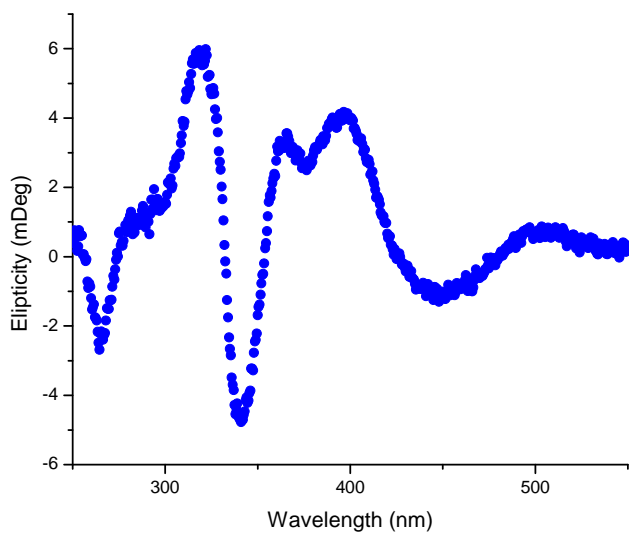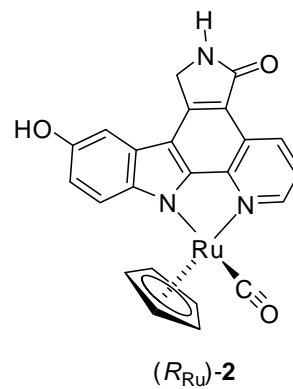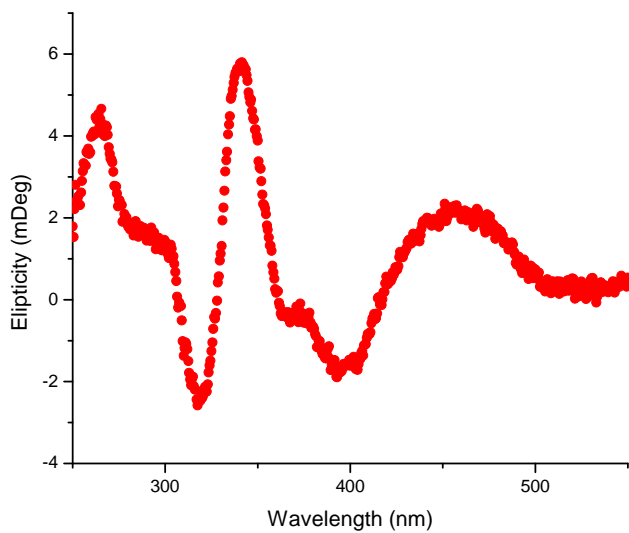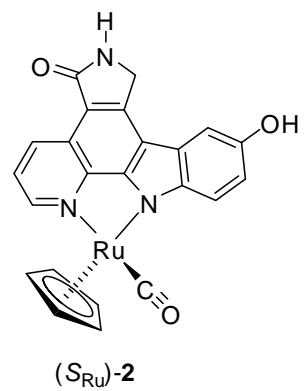

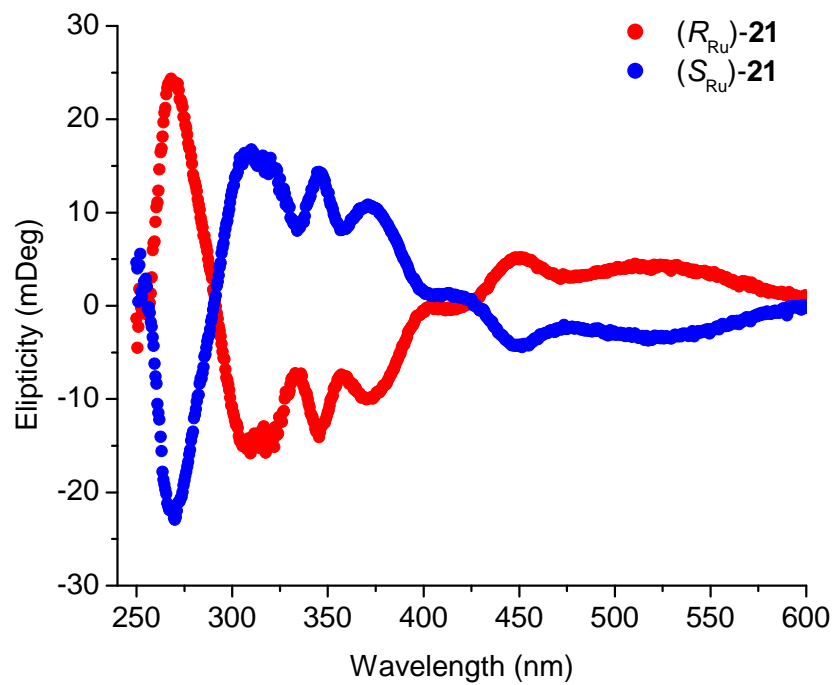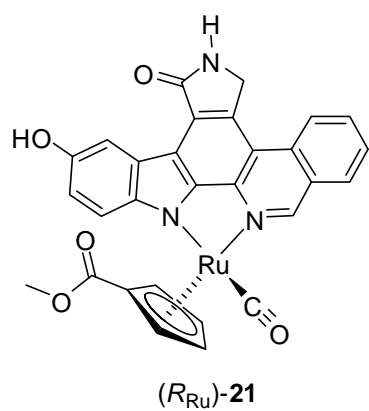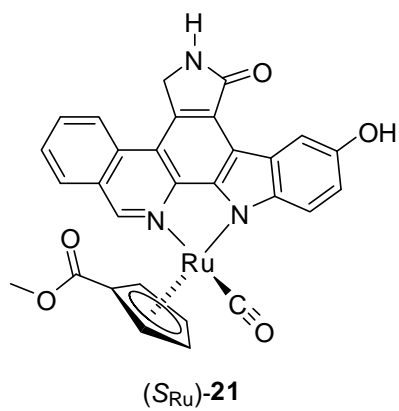

### C) ROESY Analysis of Compound 17

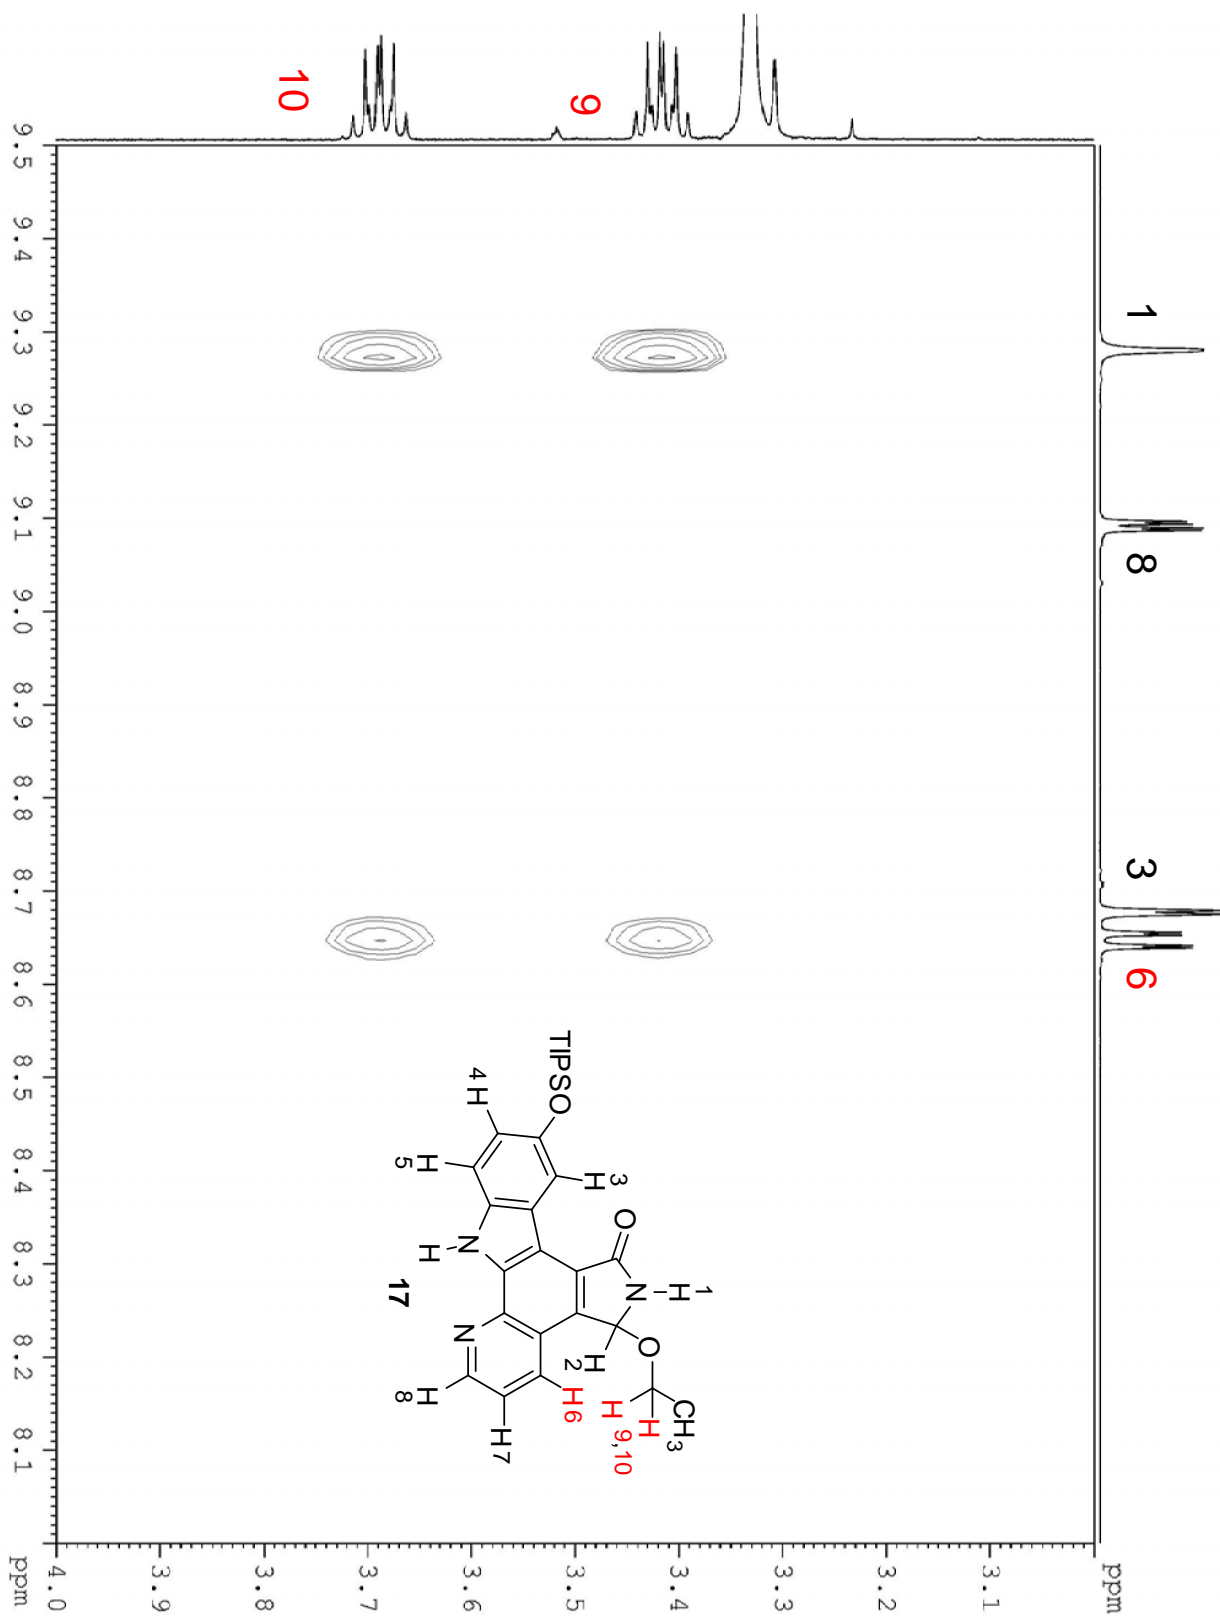

### D) NMR Spectra

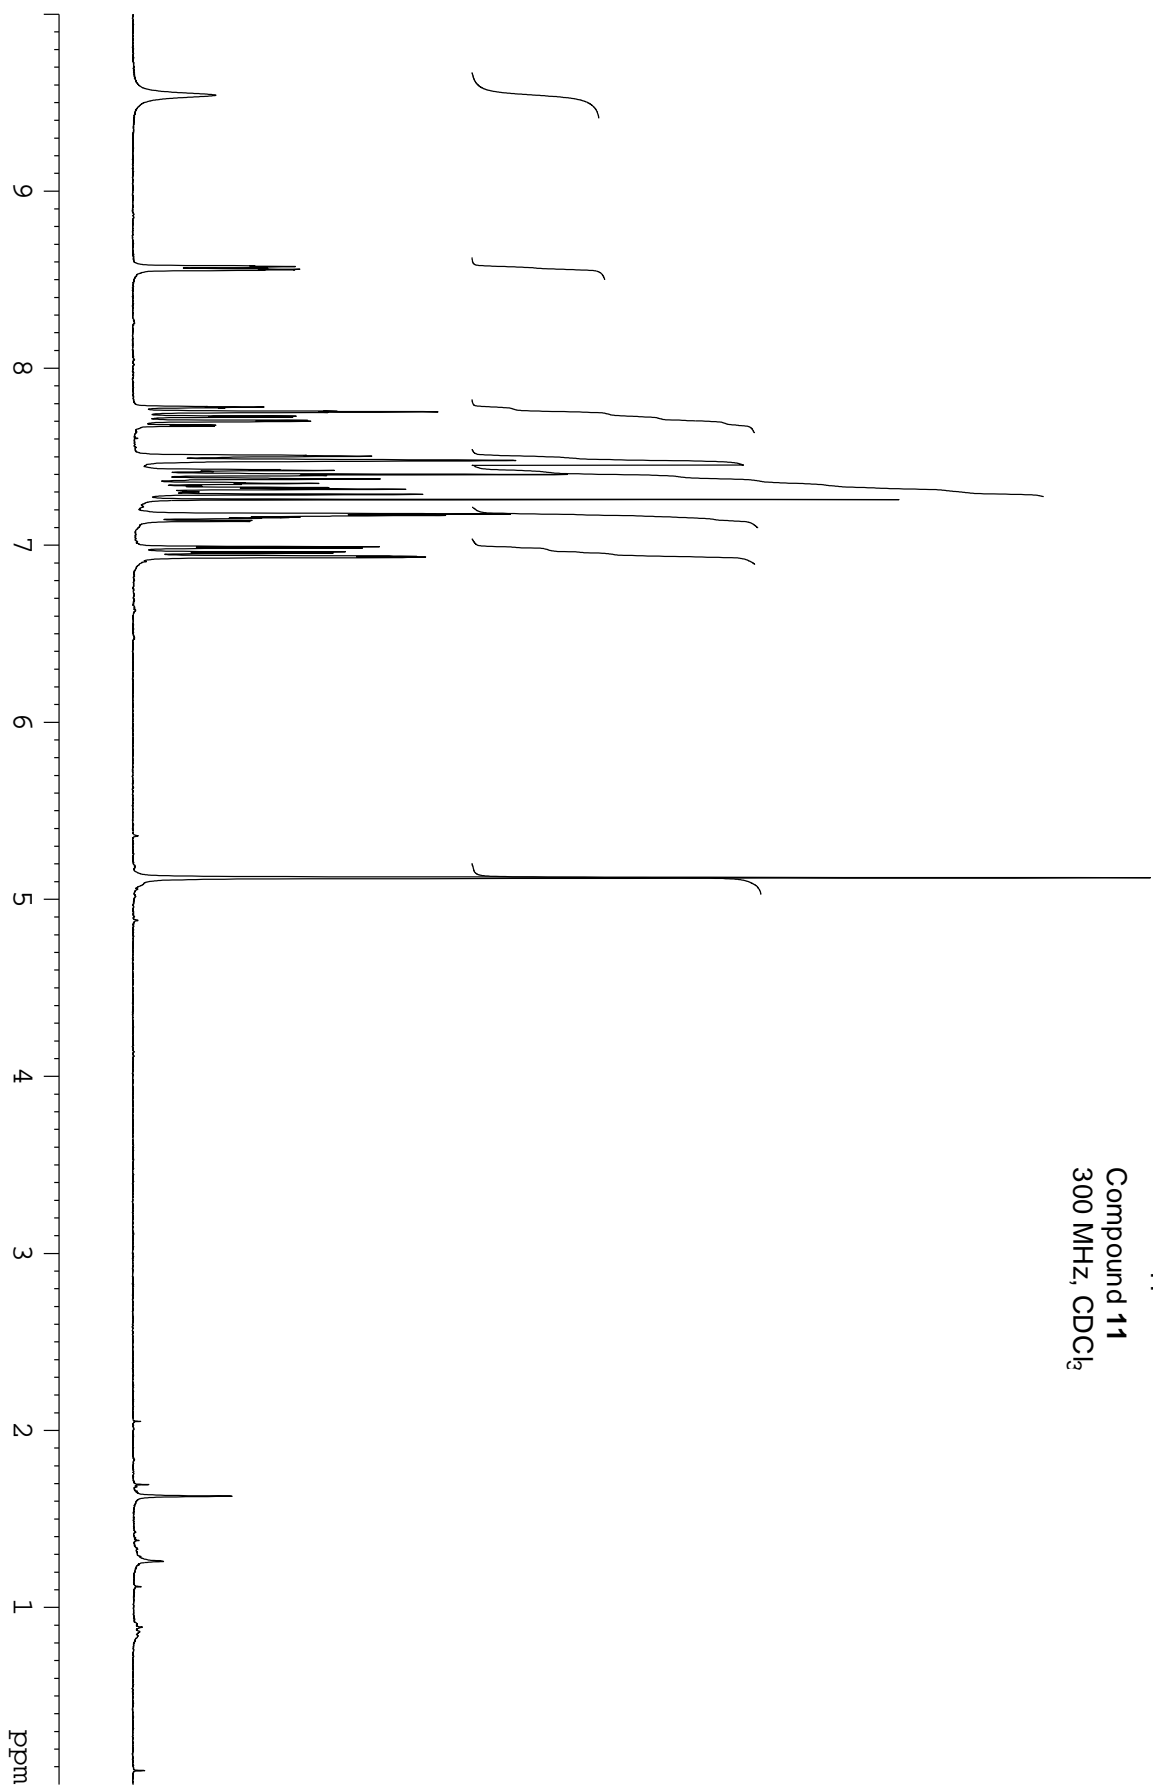

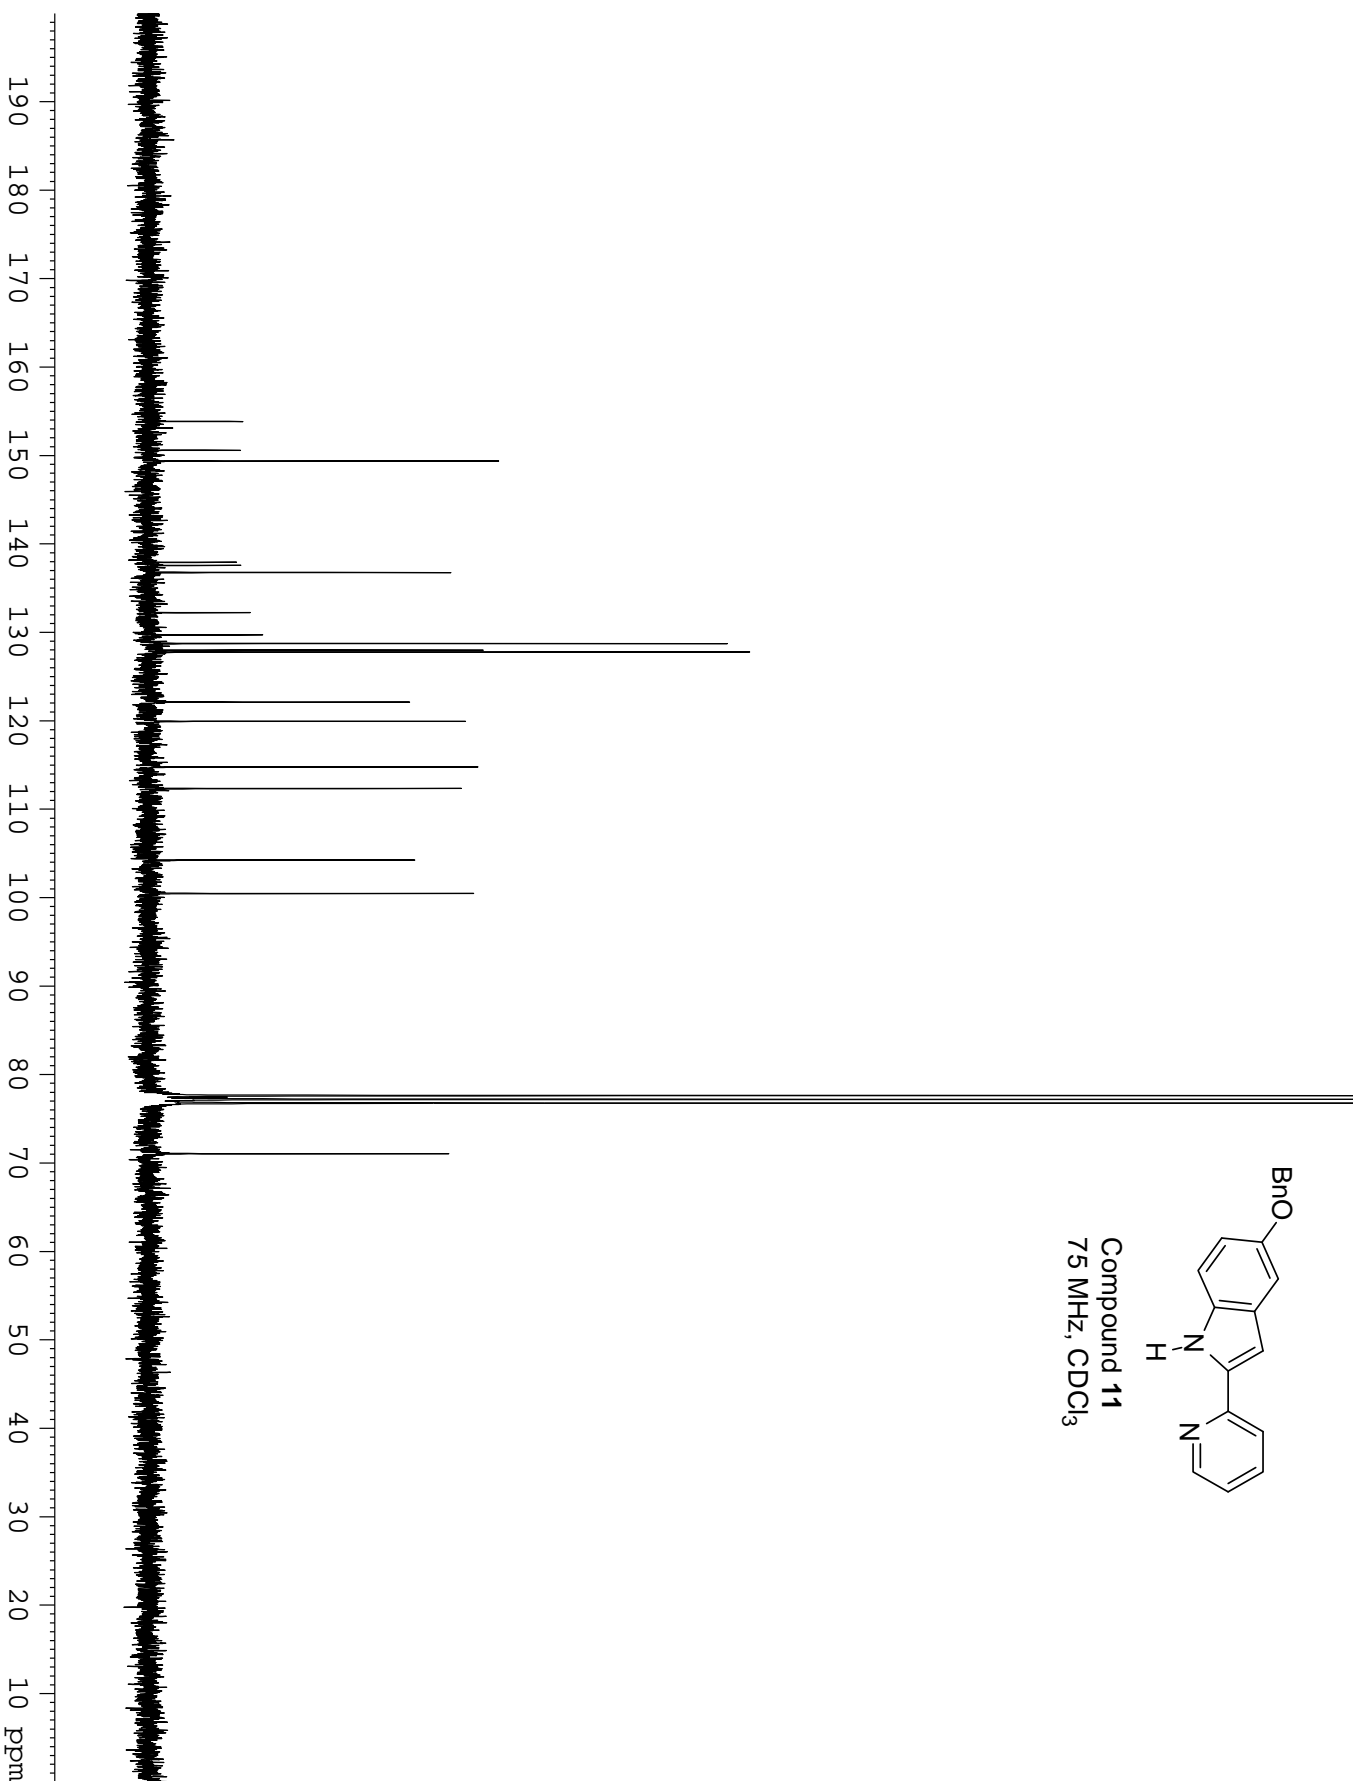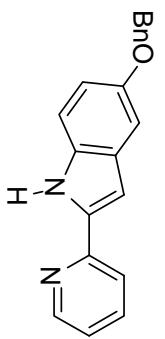

Compound 11  
75 MHz, CDCl<sub>3</sub>

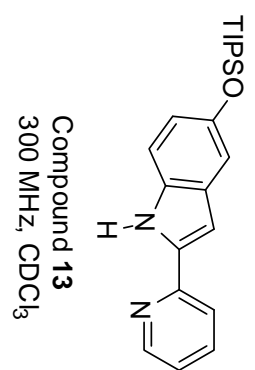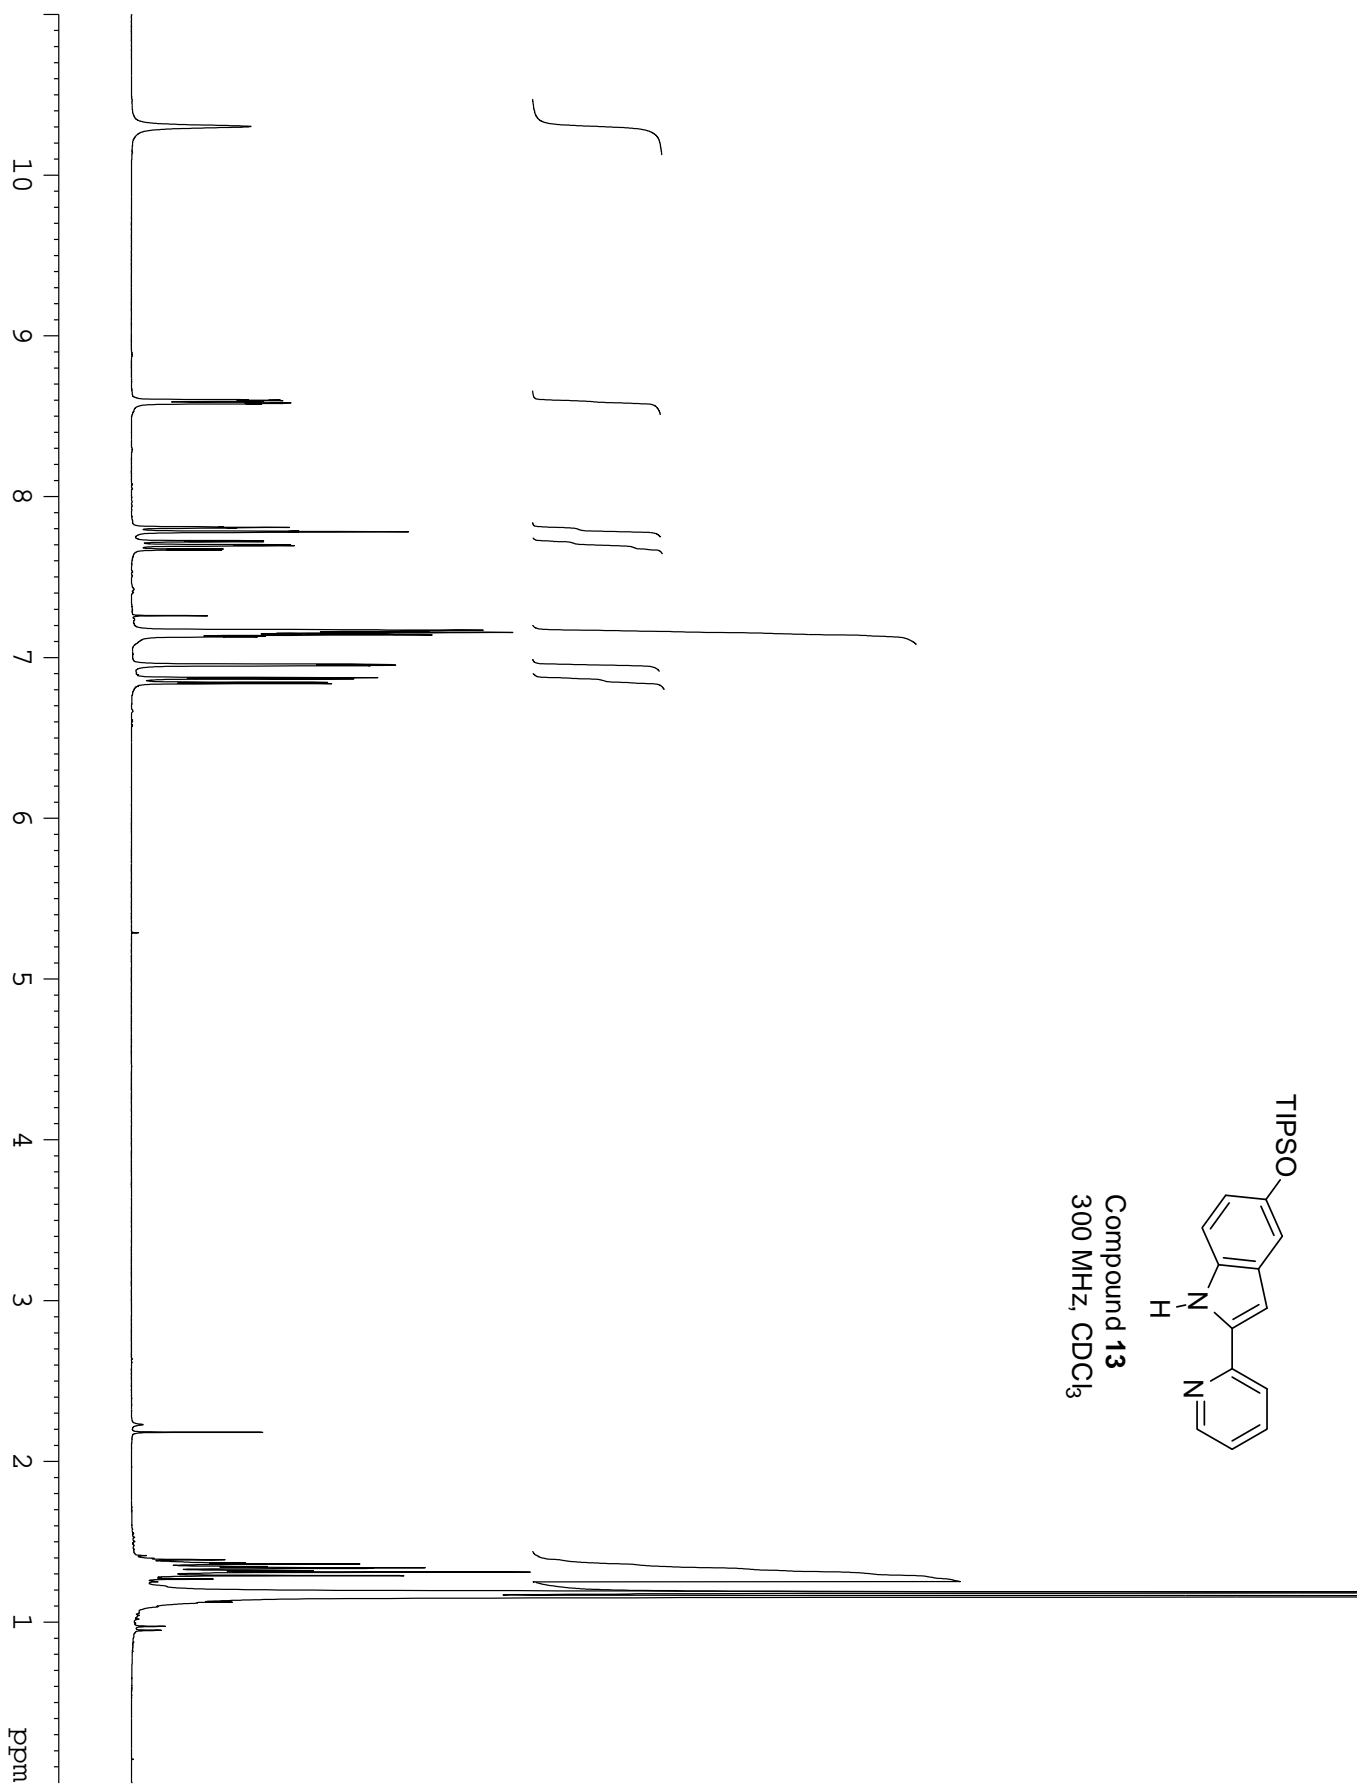

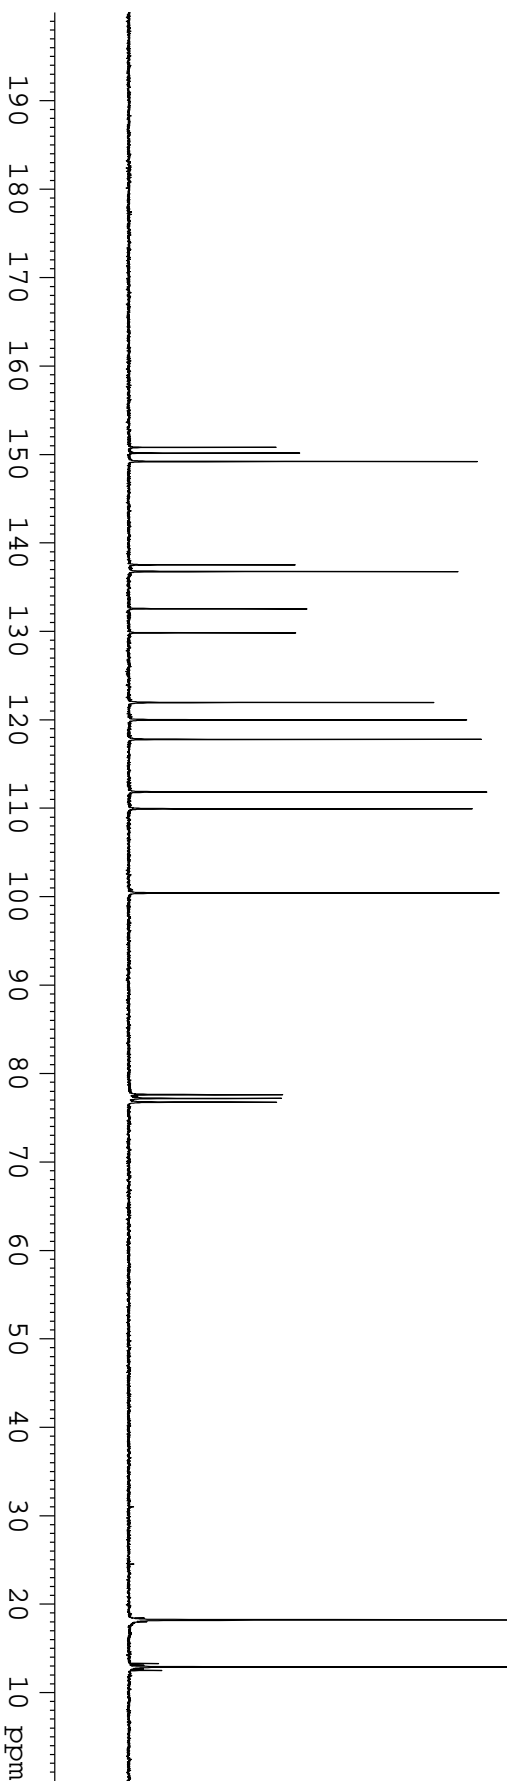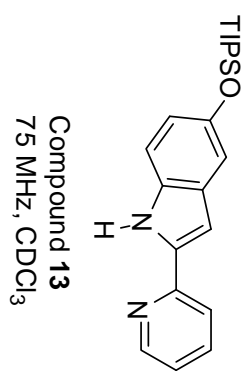

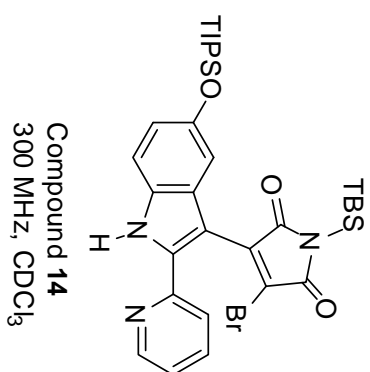

Compound 14  
300 MHz, CDCl<sub>3</sub>

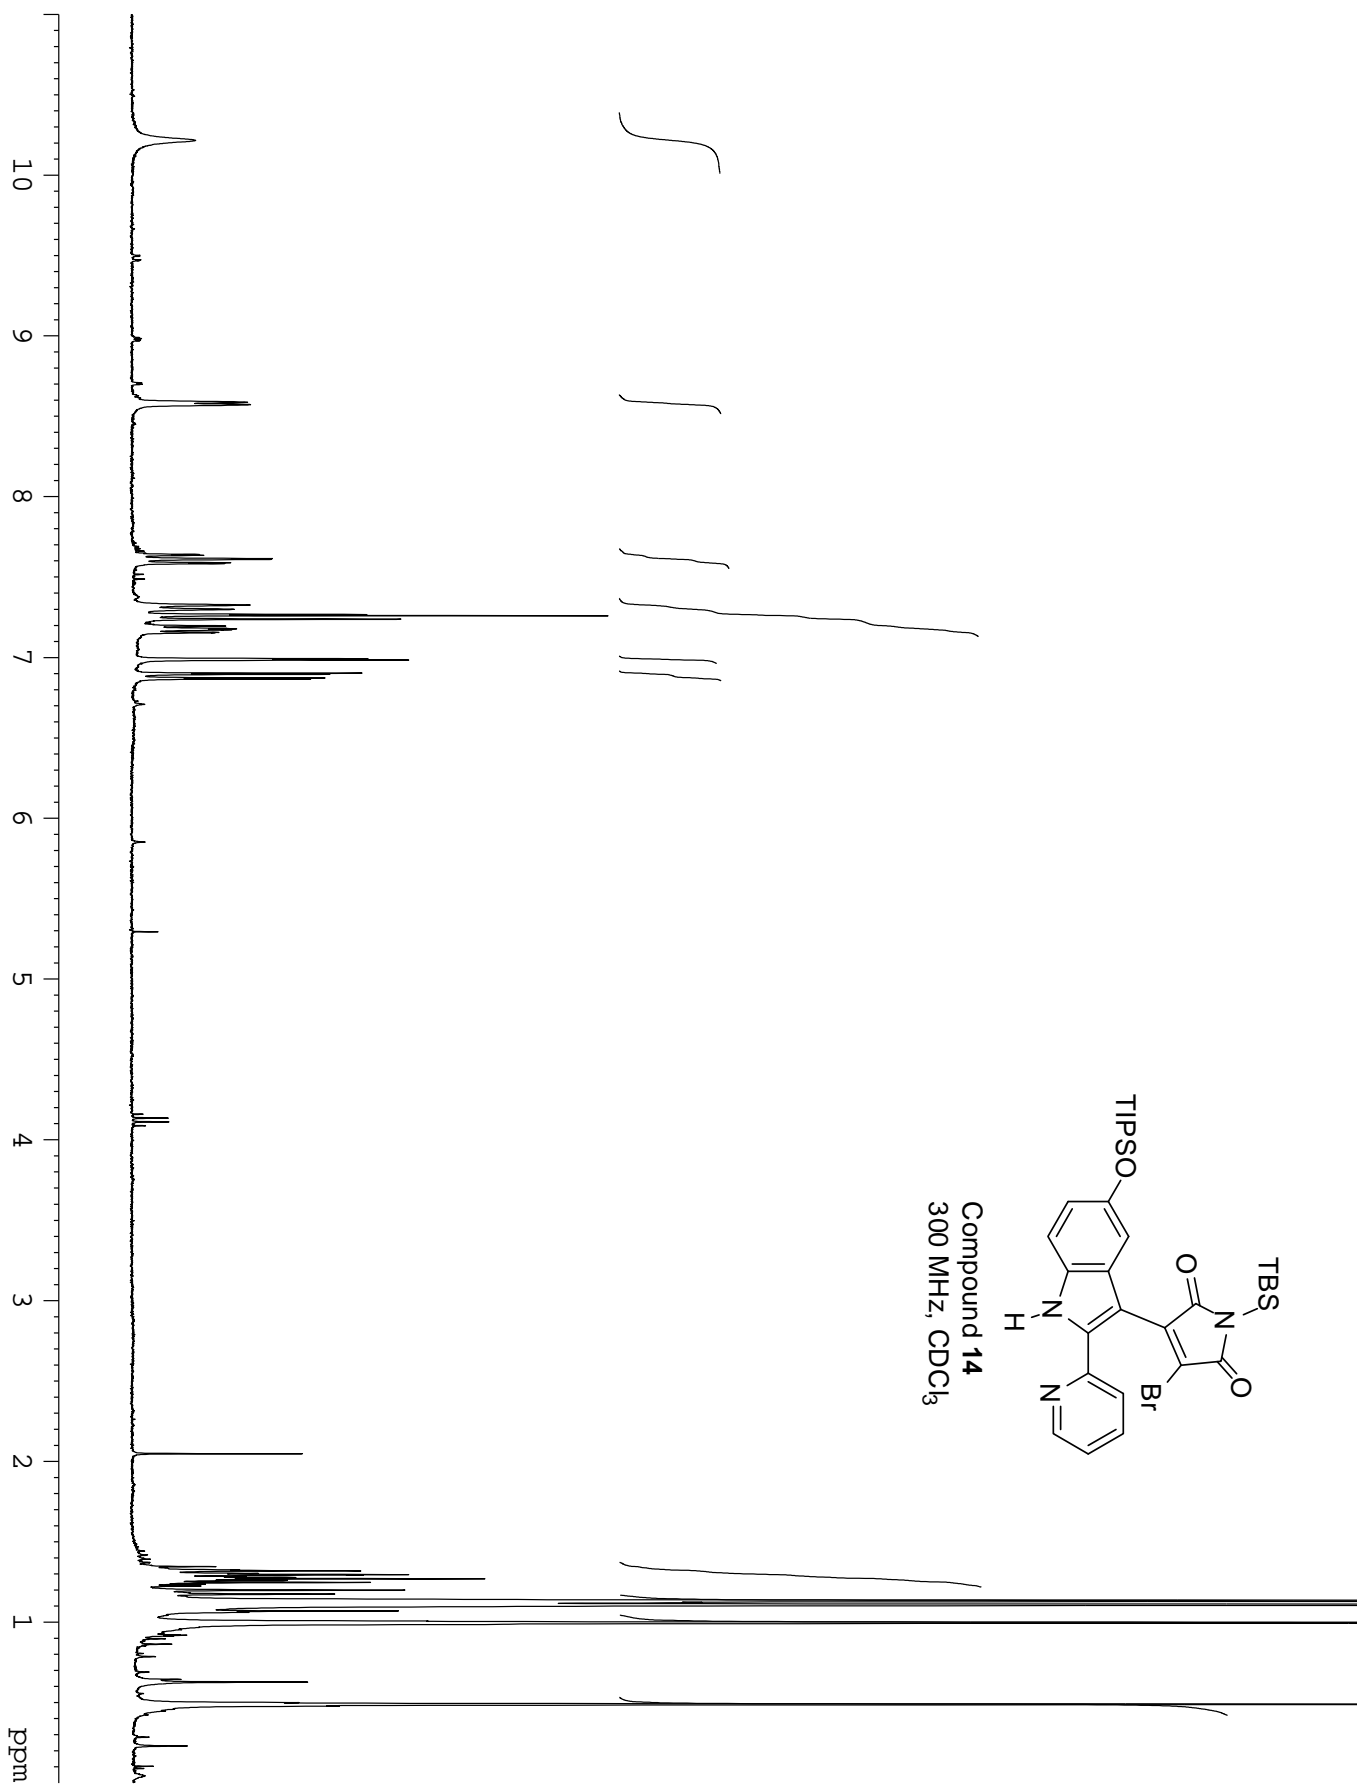



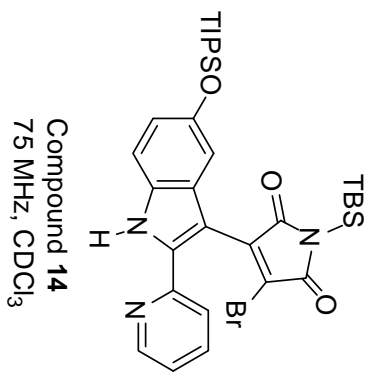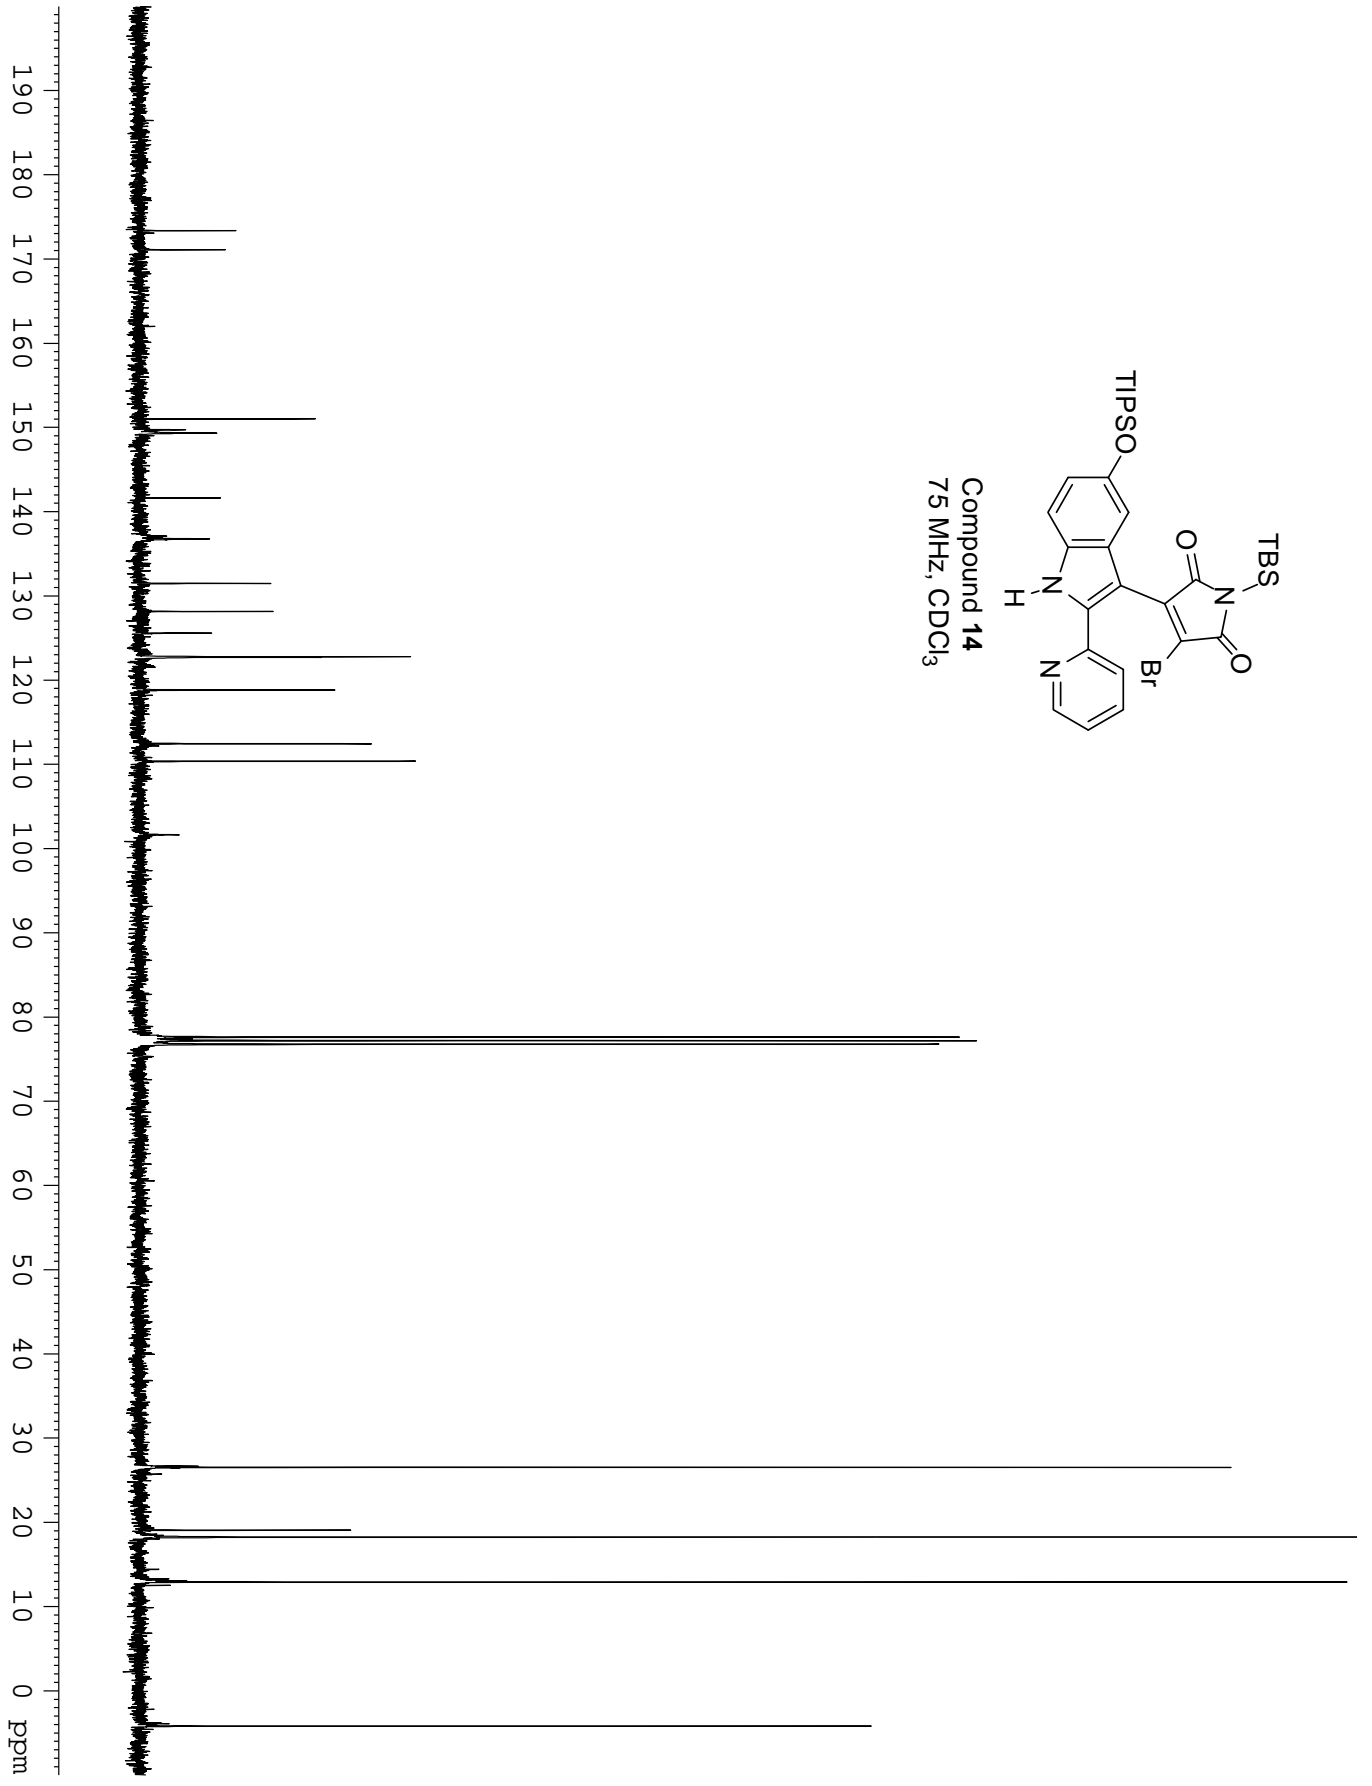

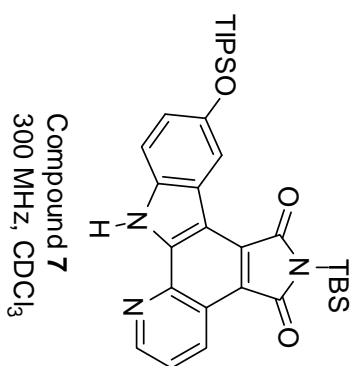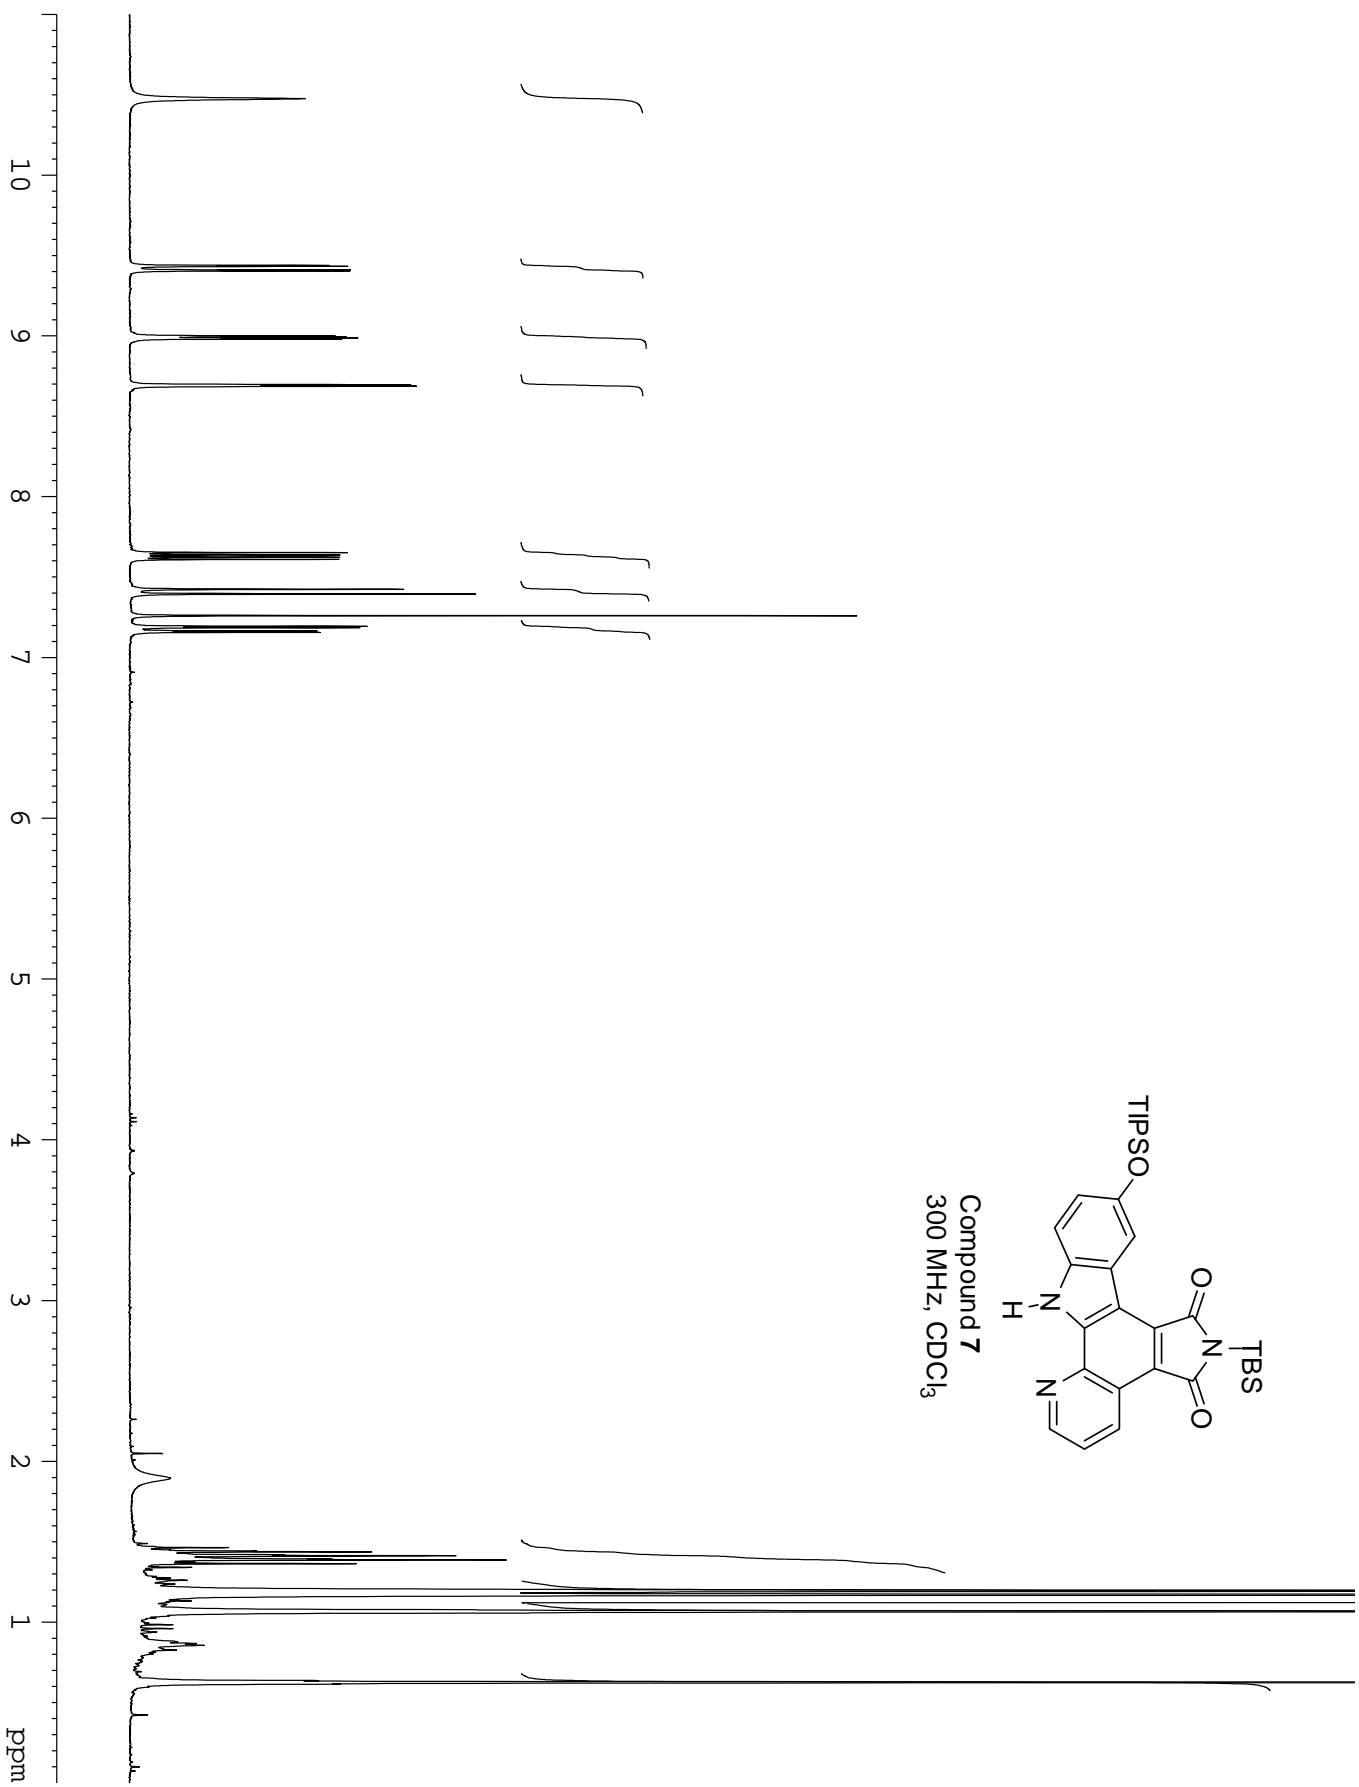

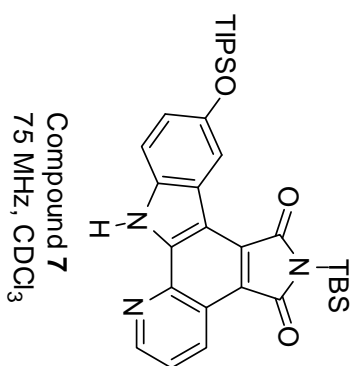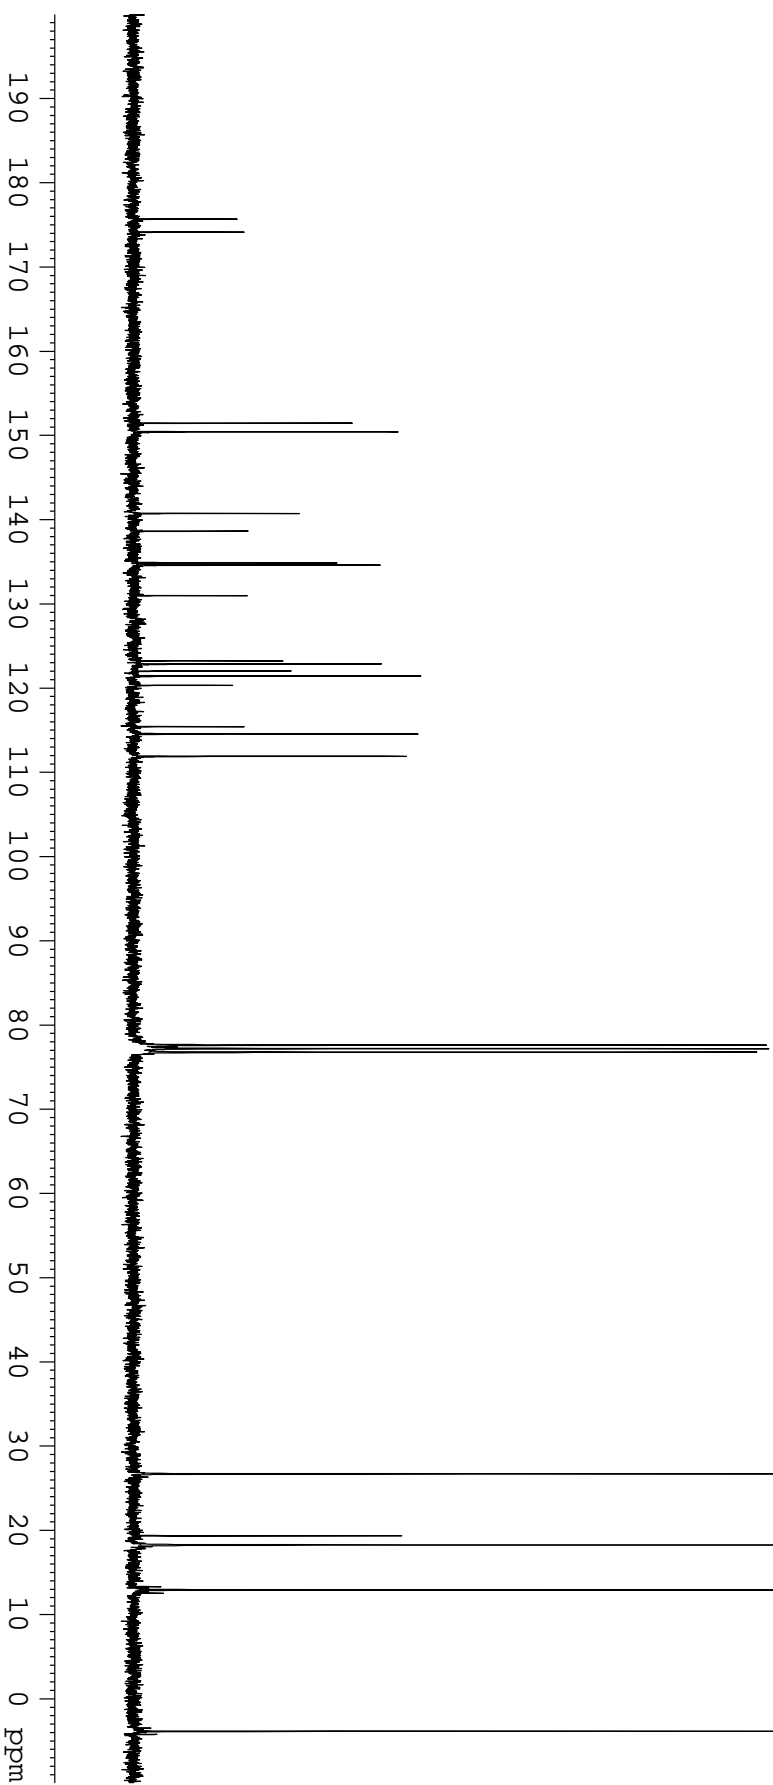

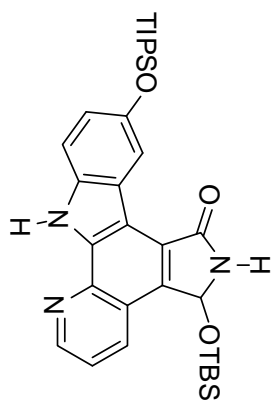

Compound **15**  
300 MHz, DMSO-*d*<sub>6</sub>

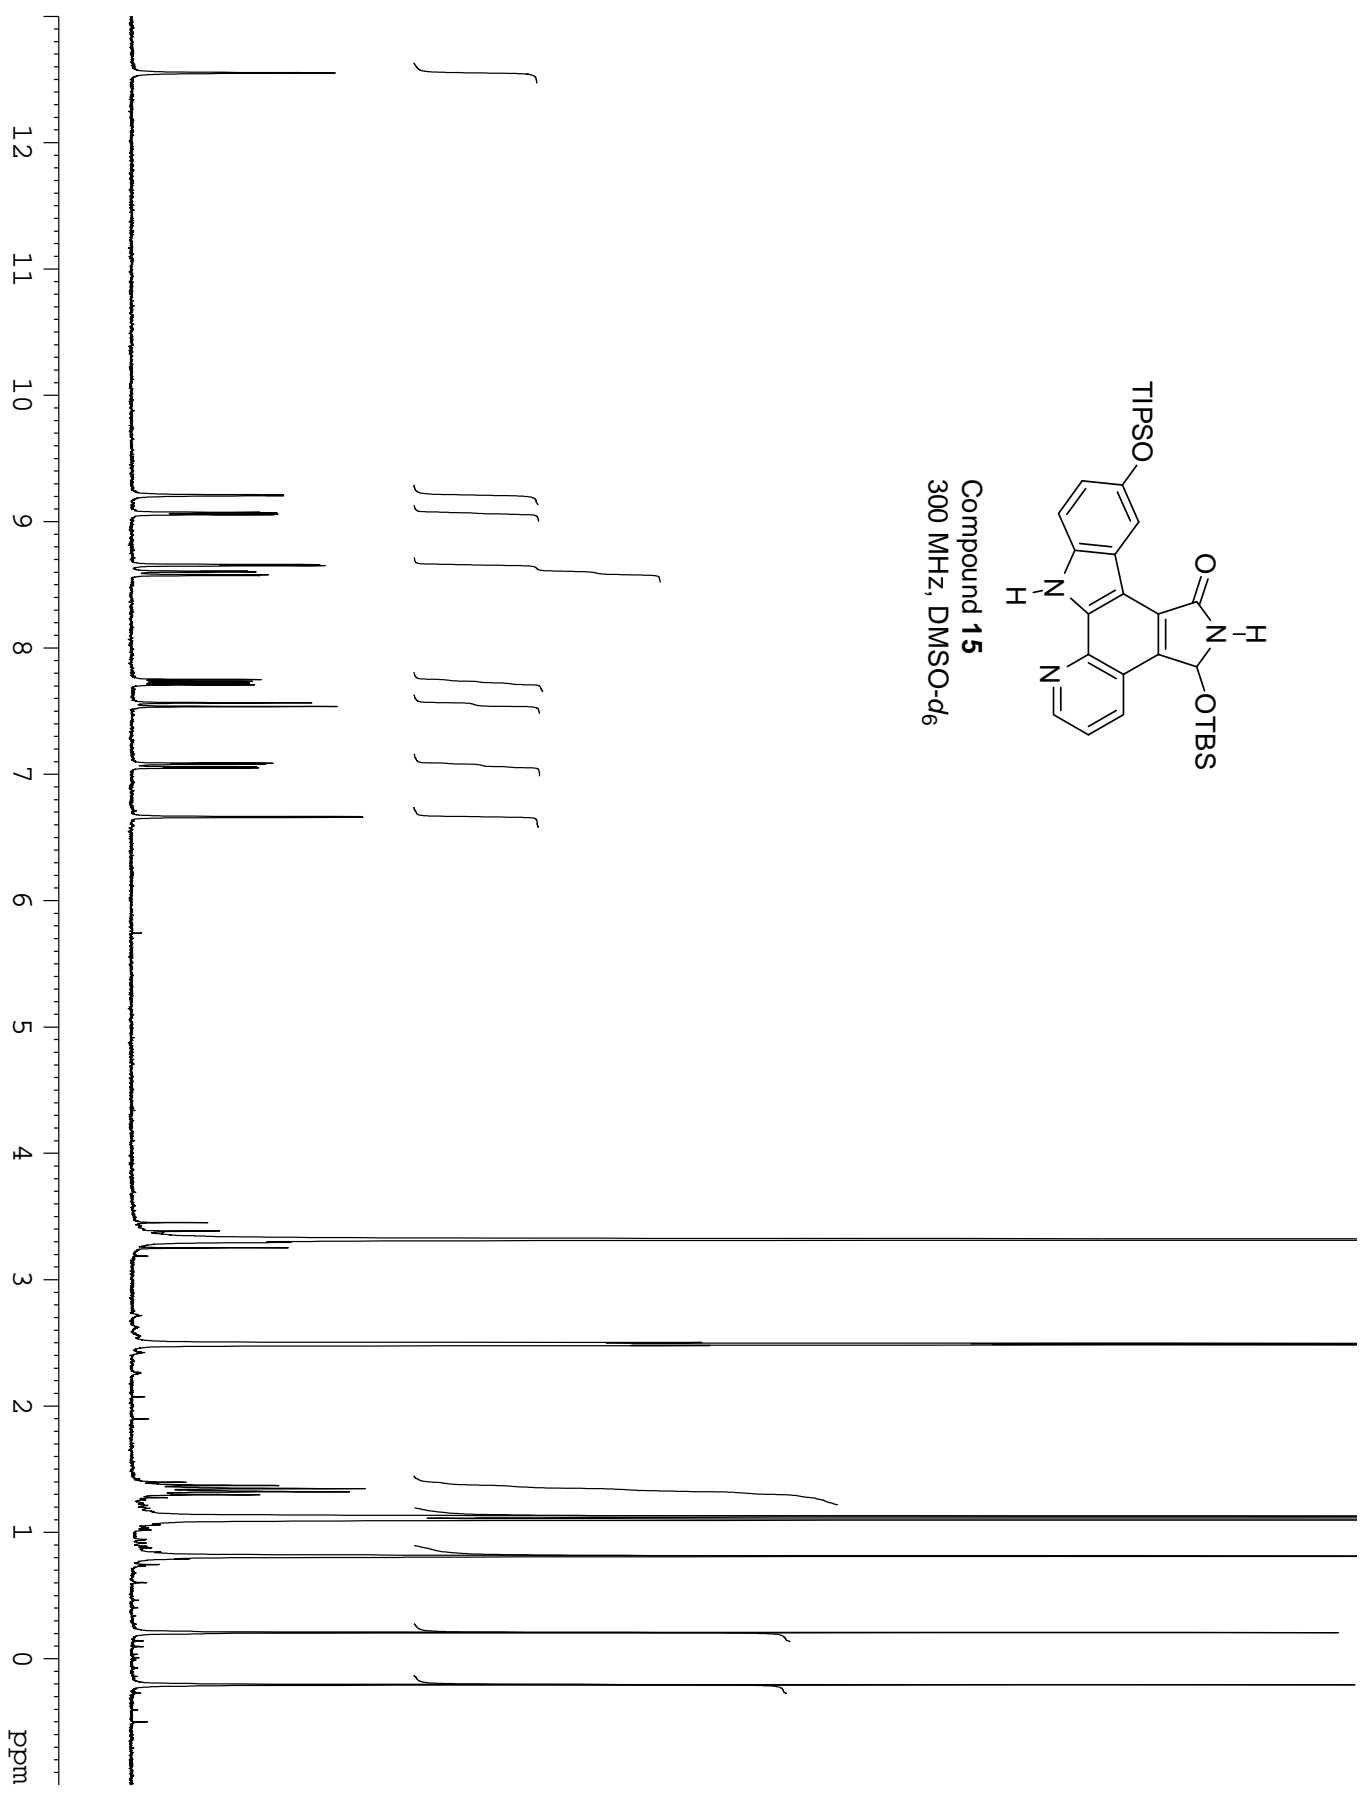

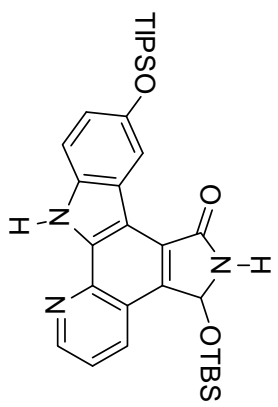

Compound 15  
100 MHz, DMSO-*d*<sub>6</sub>

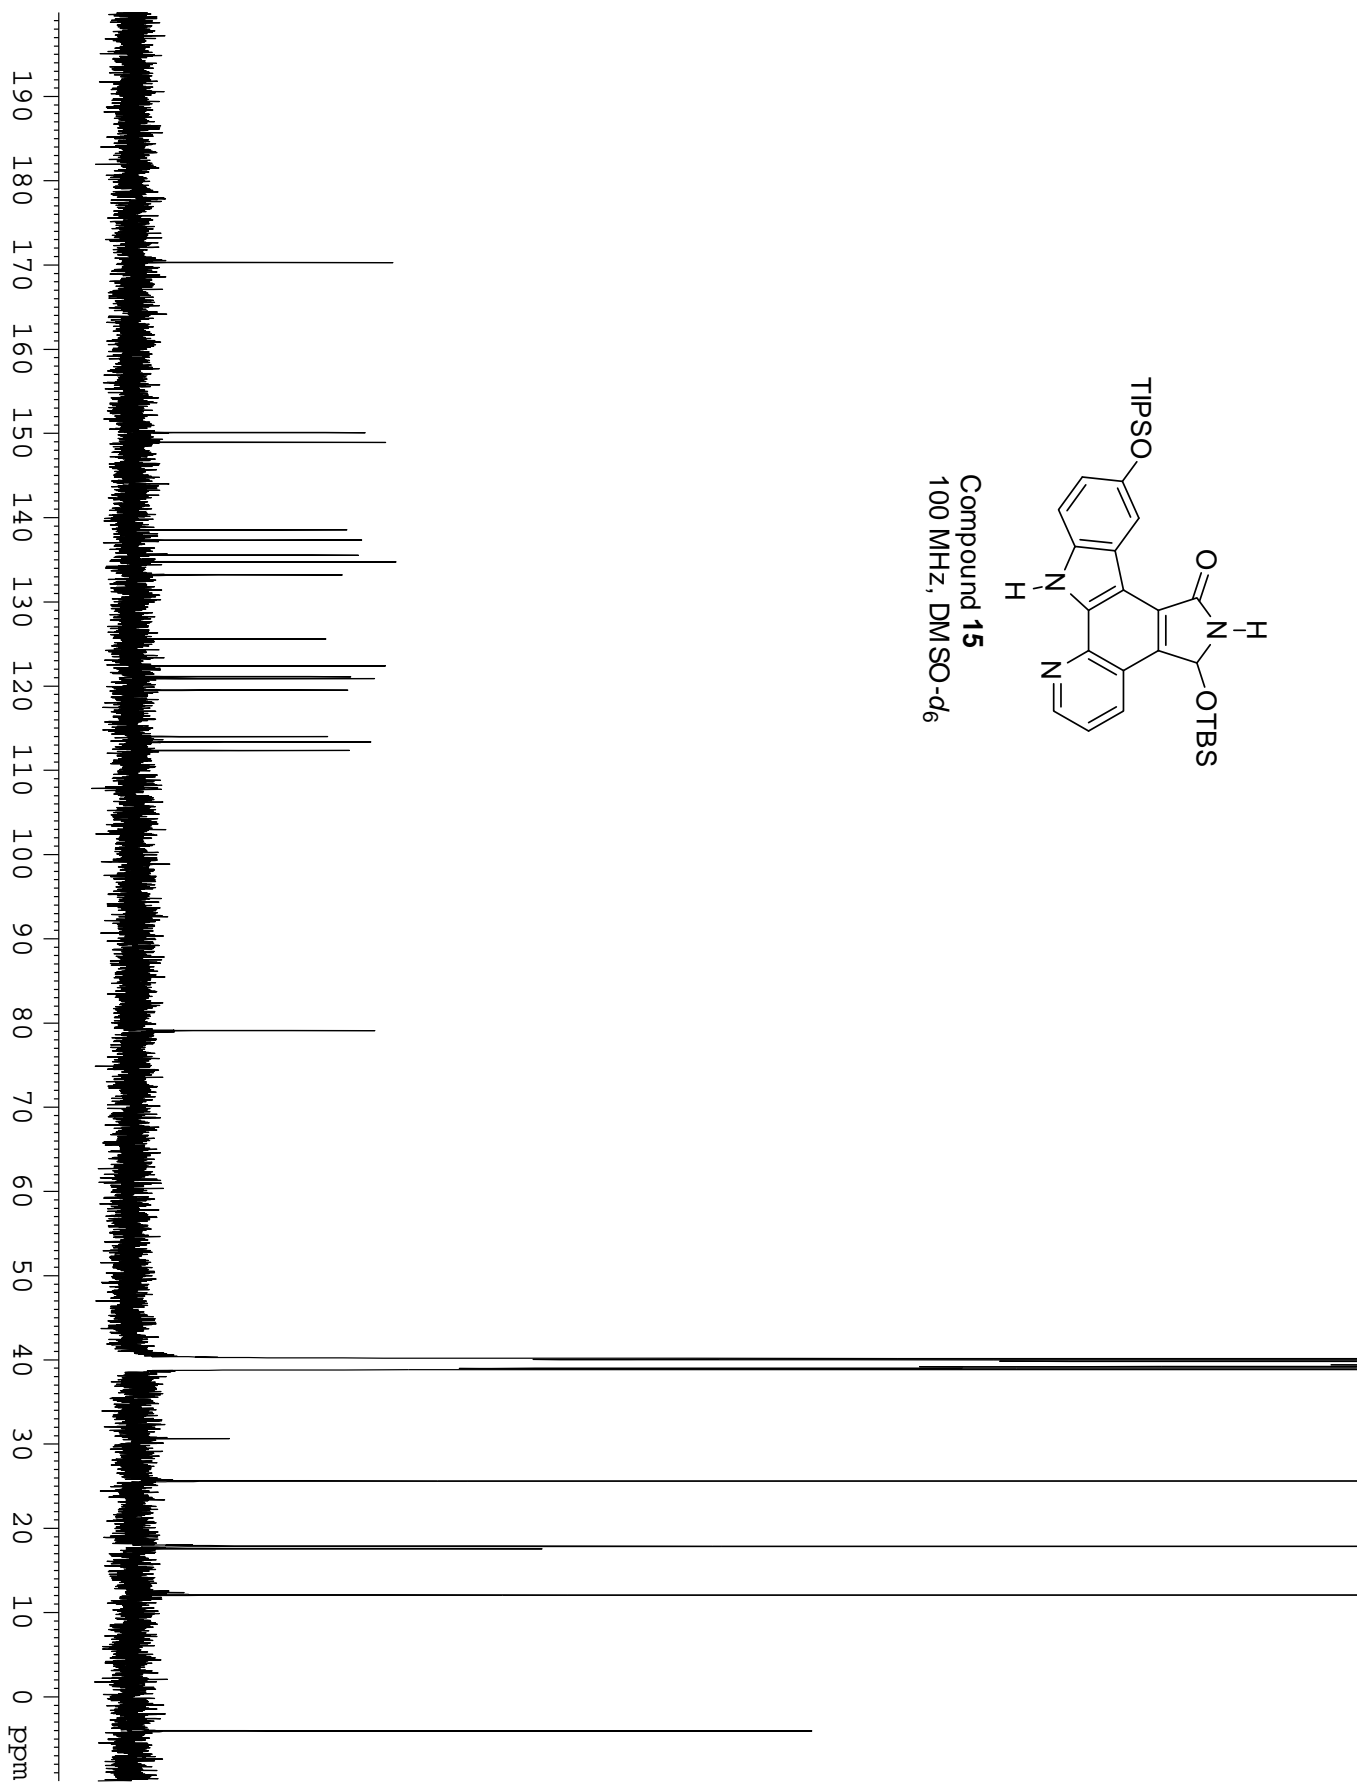

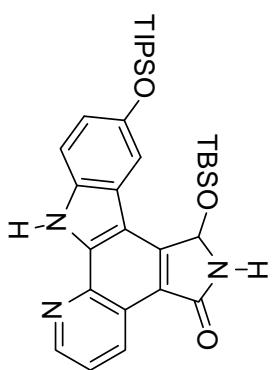

Compound **16**  
300 MHz, DMSO-*d*<sub>6</sub>

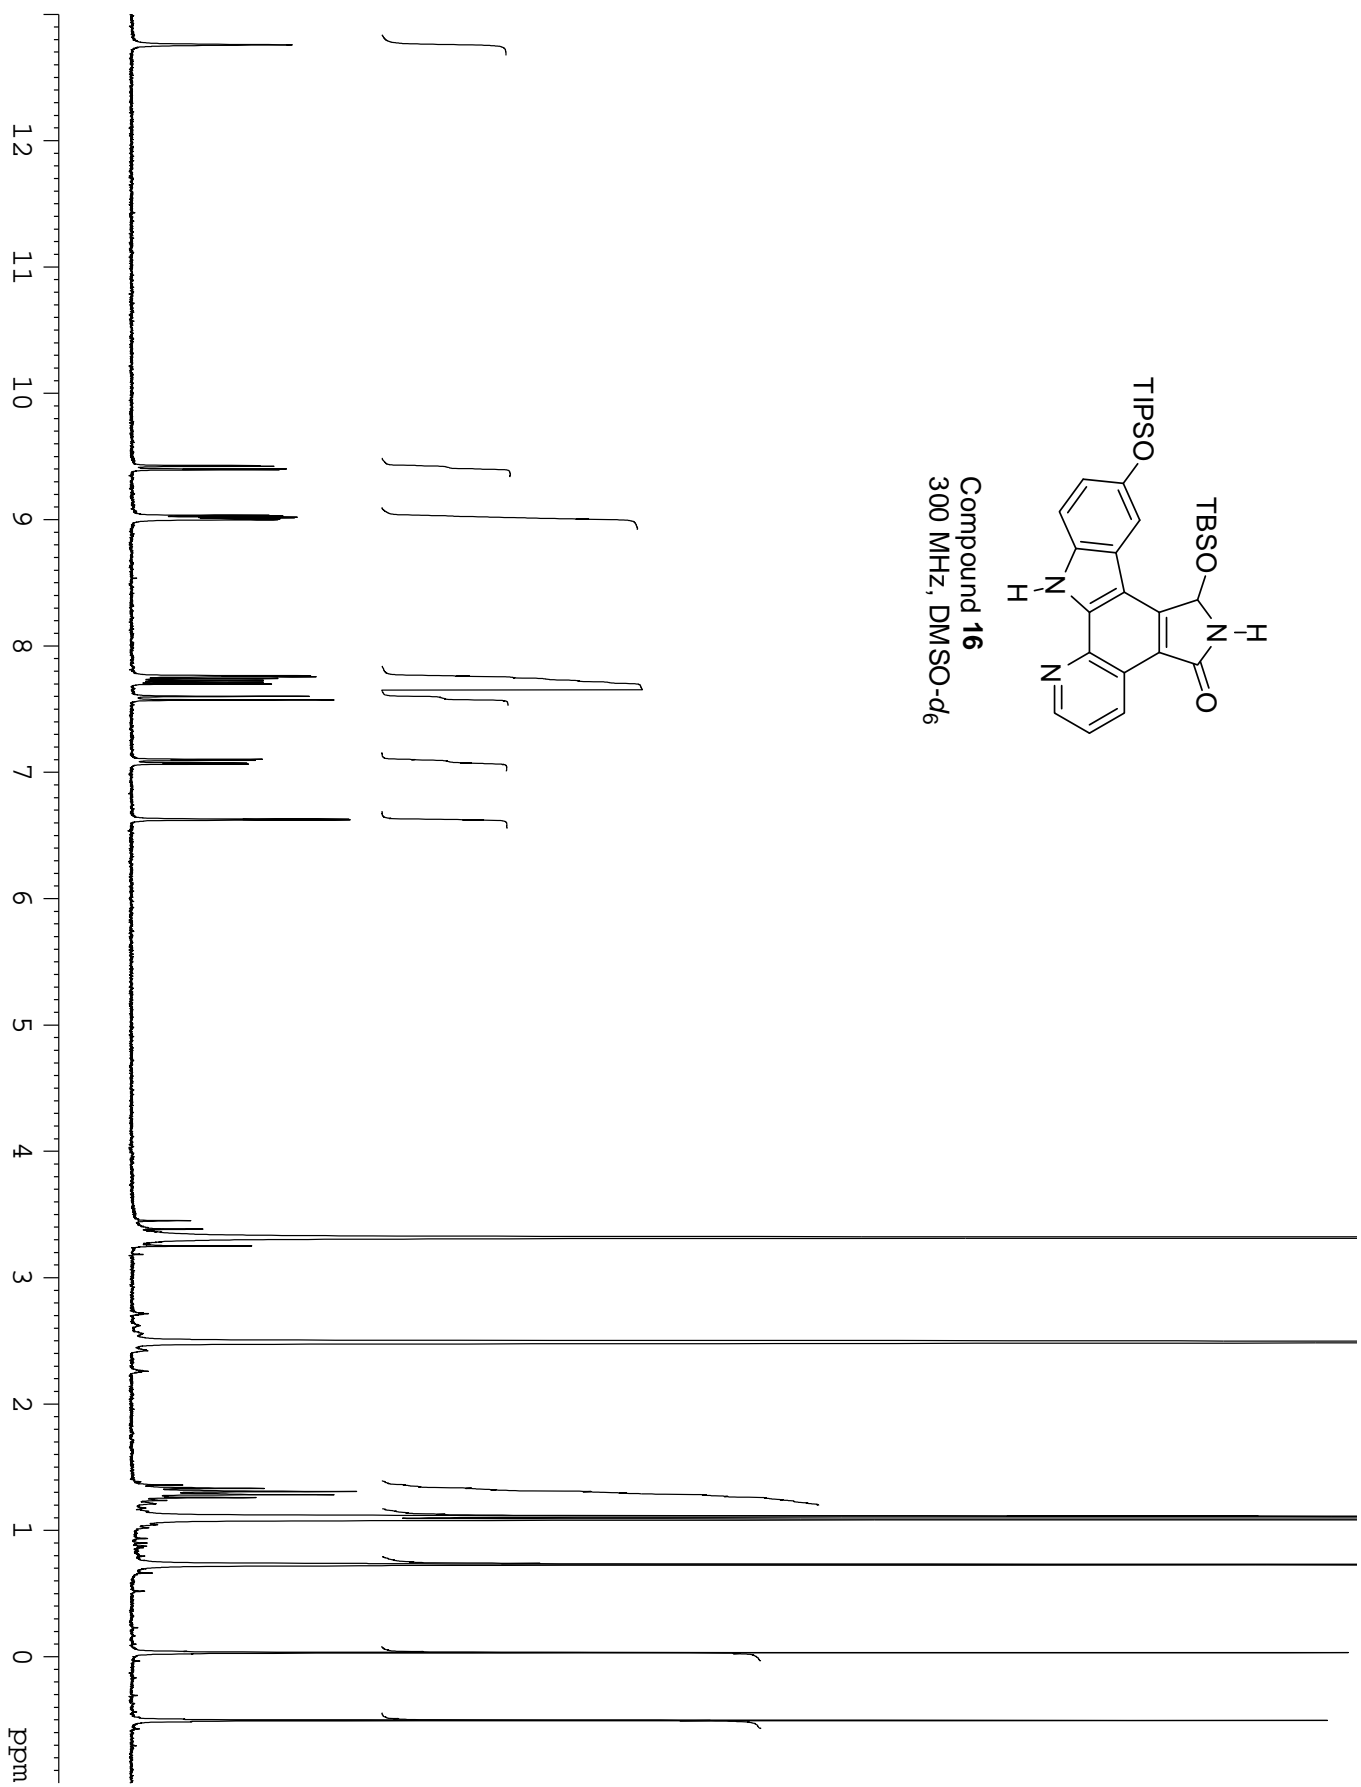

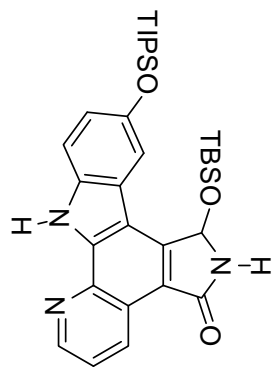

Compound **16**  
100 MHz, DMSO-*d*<sub>6</sub>

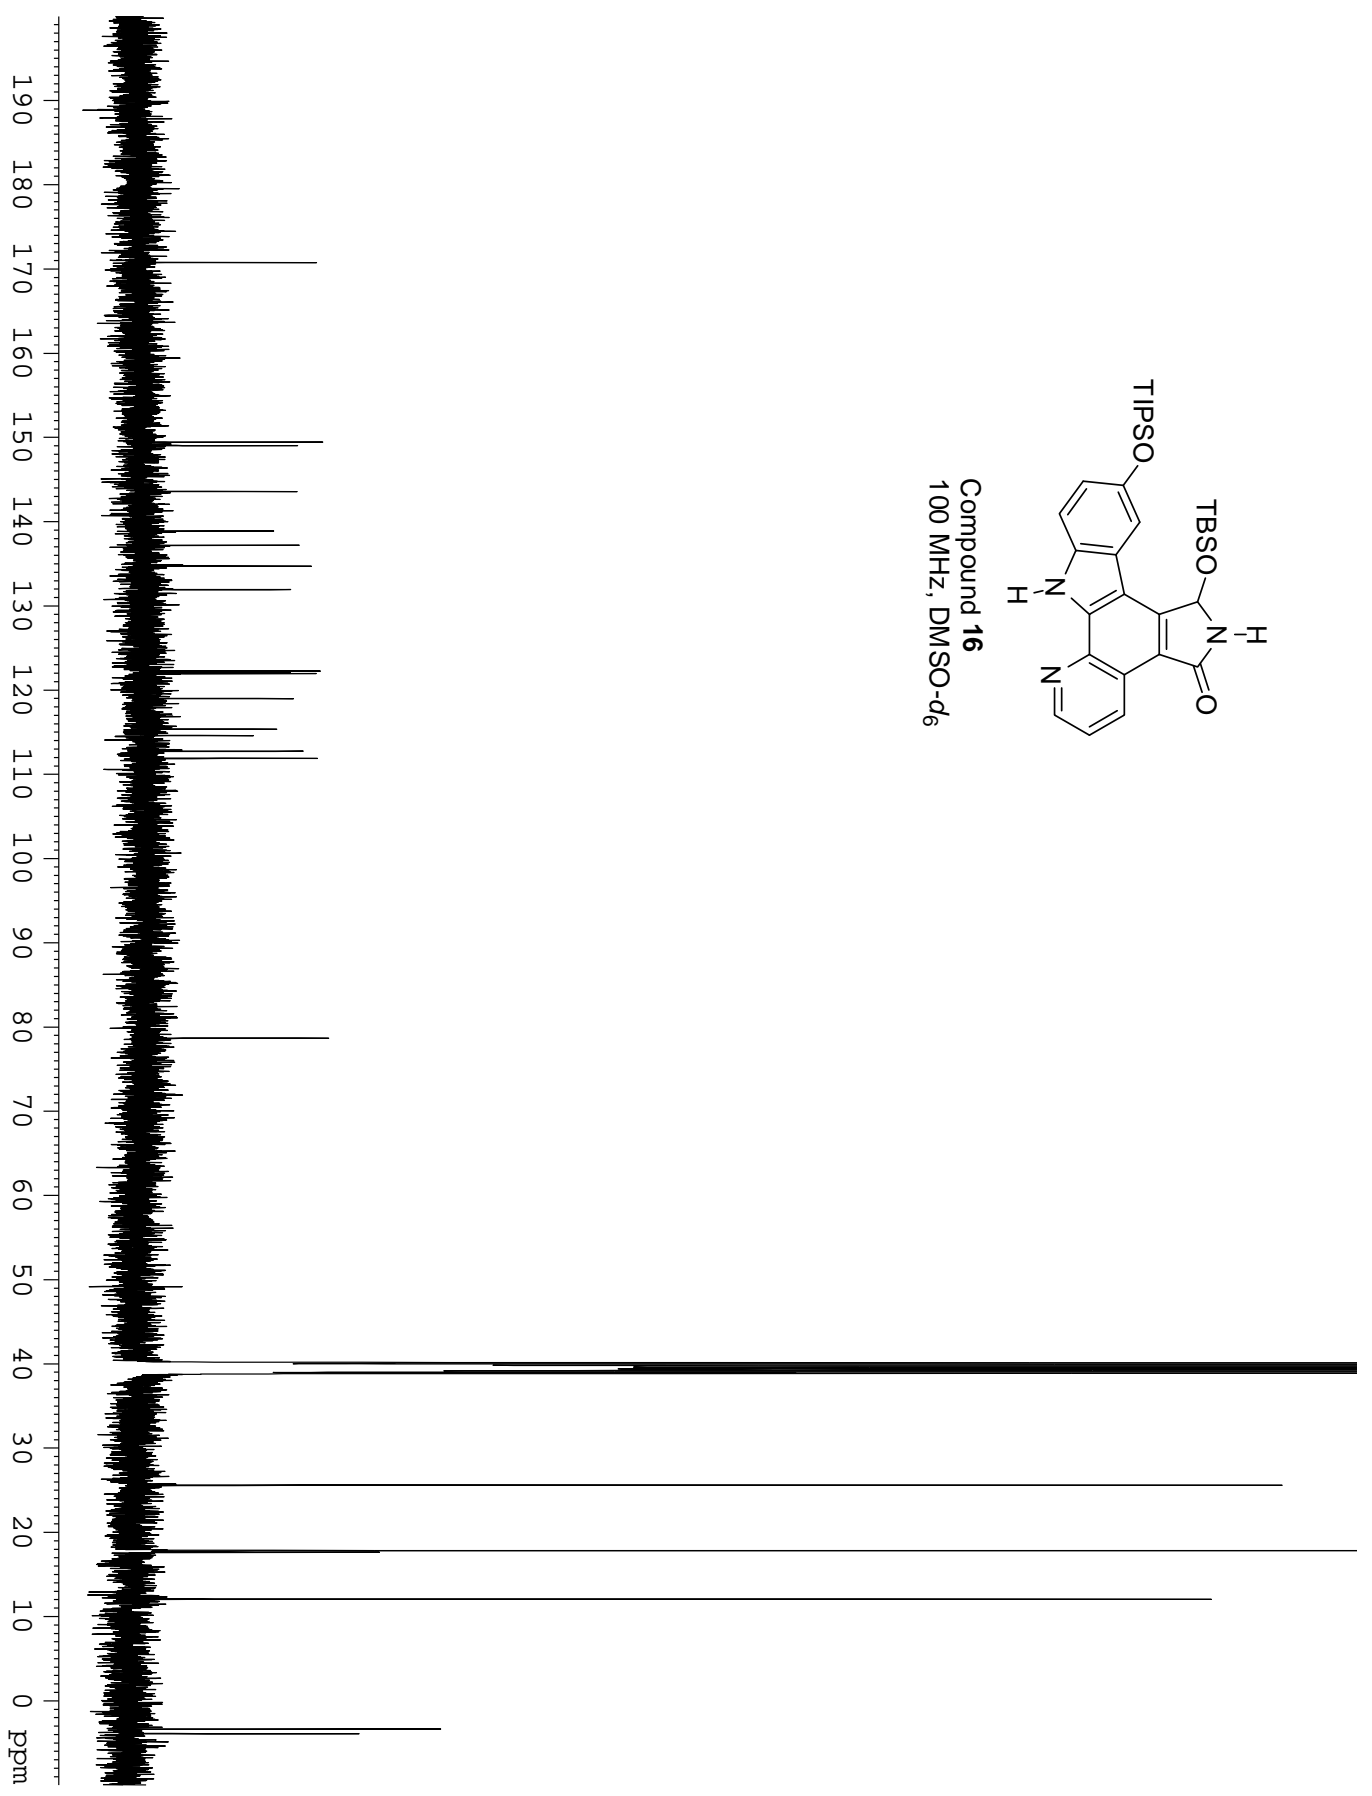

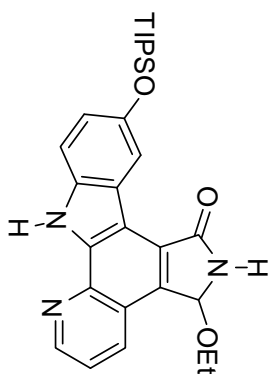

Compound 17  
300 MHz, DMSO-*d*<sub>6</sub>

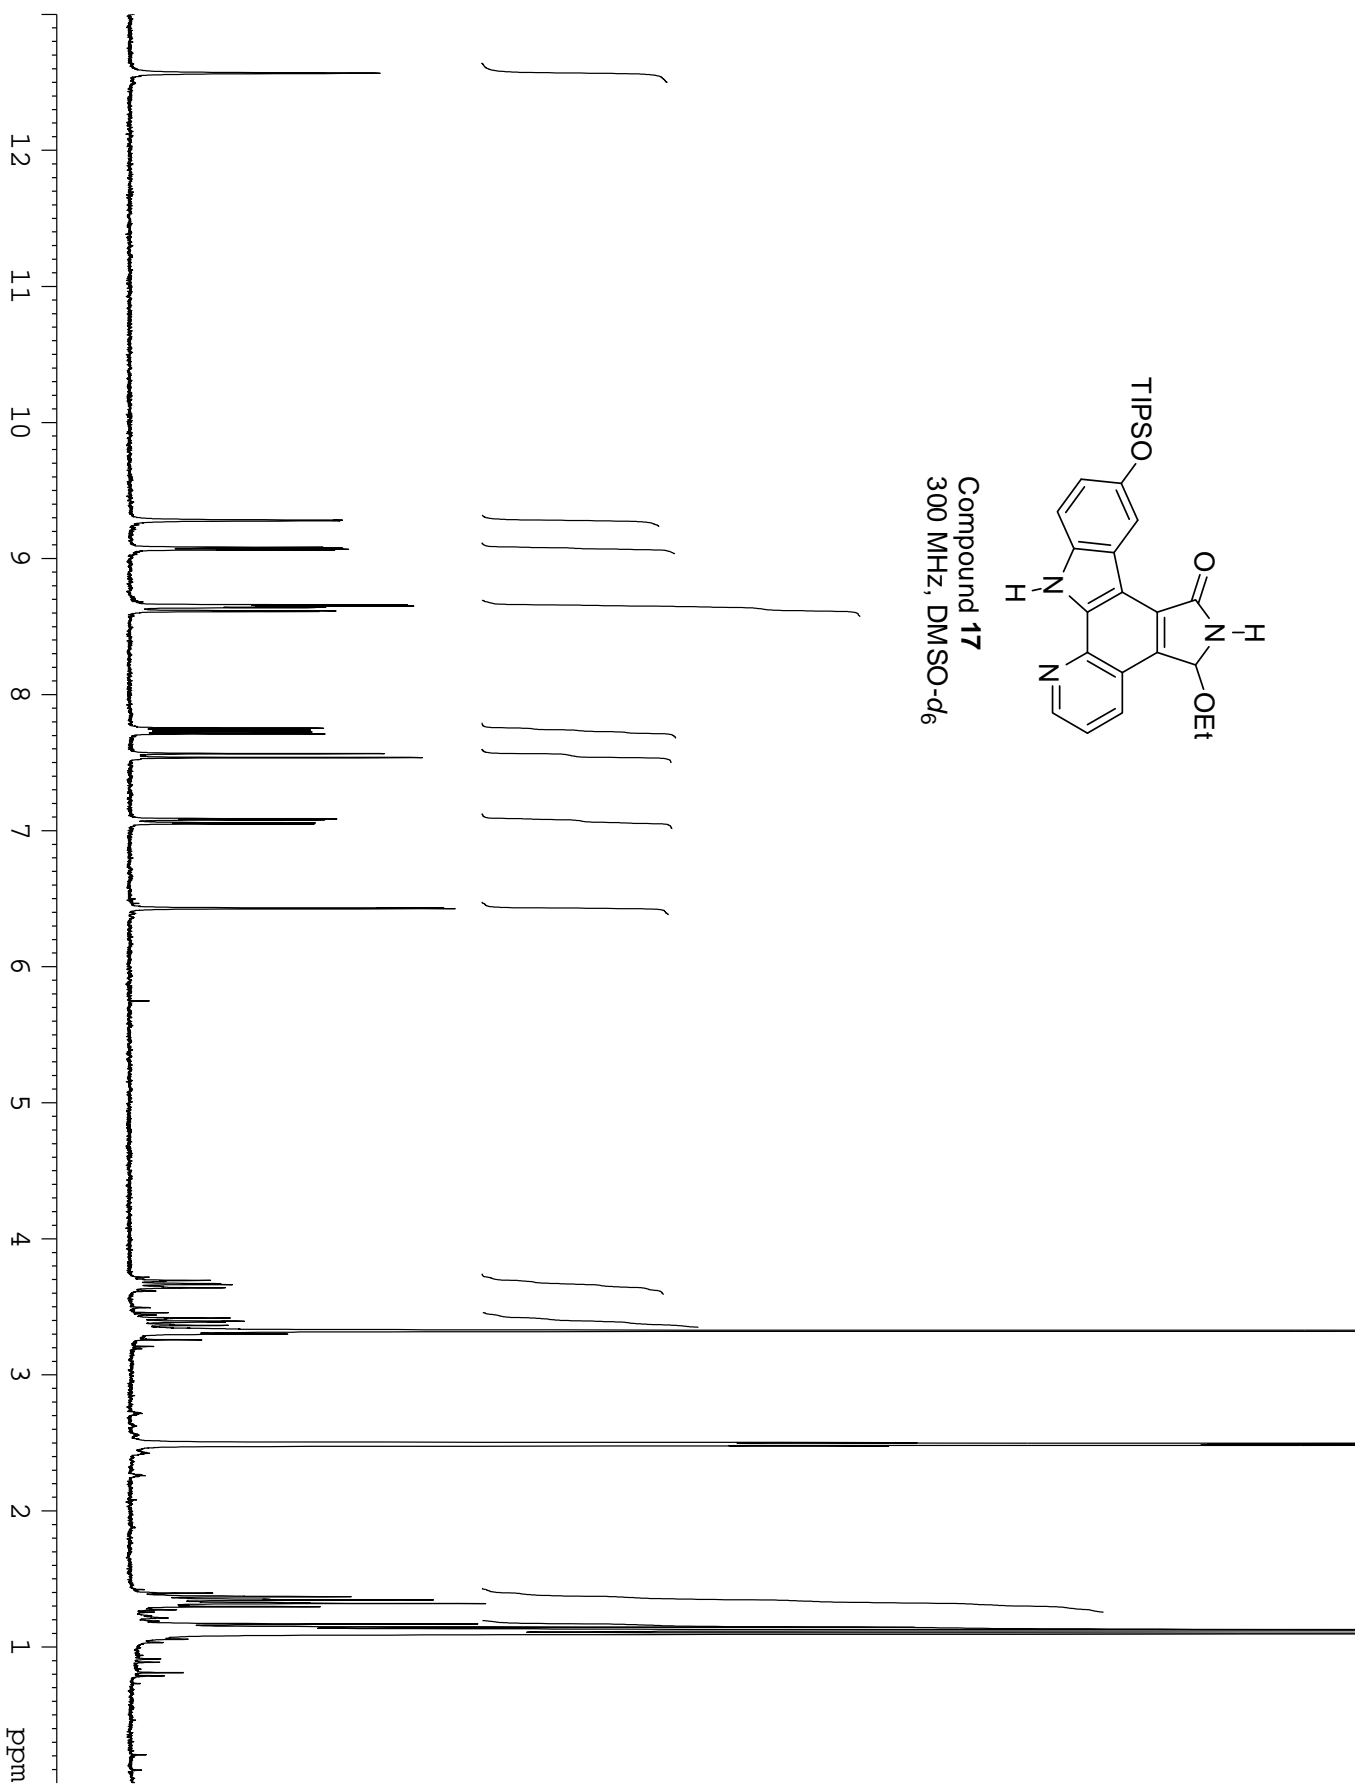



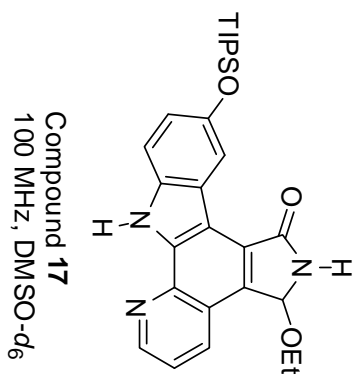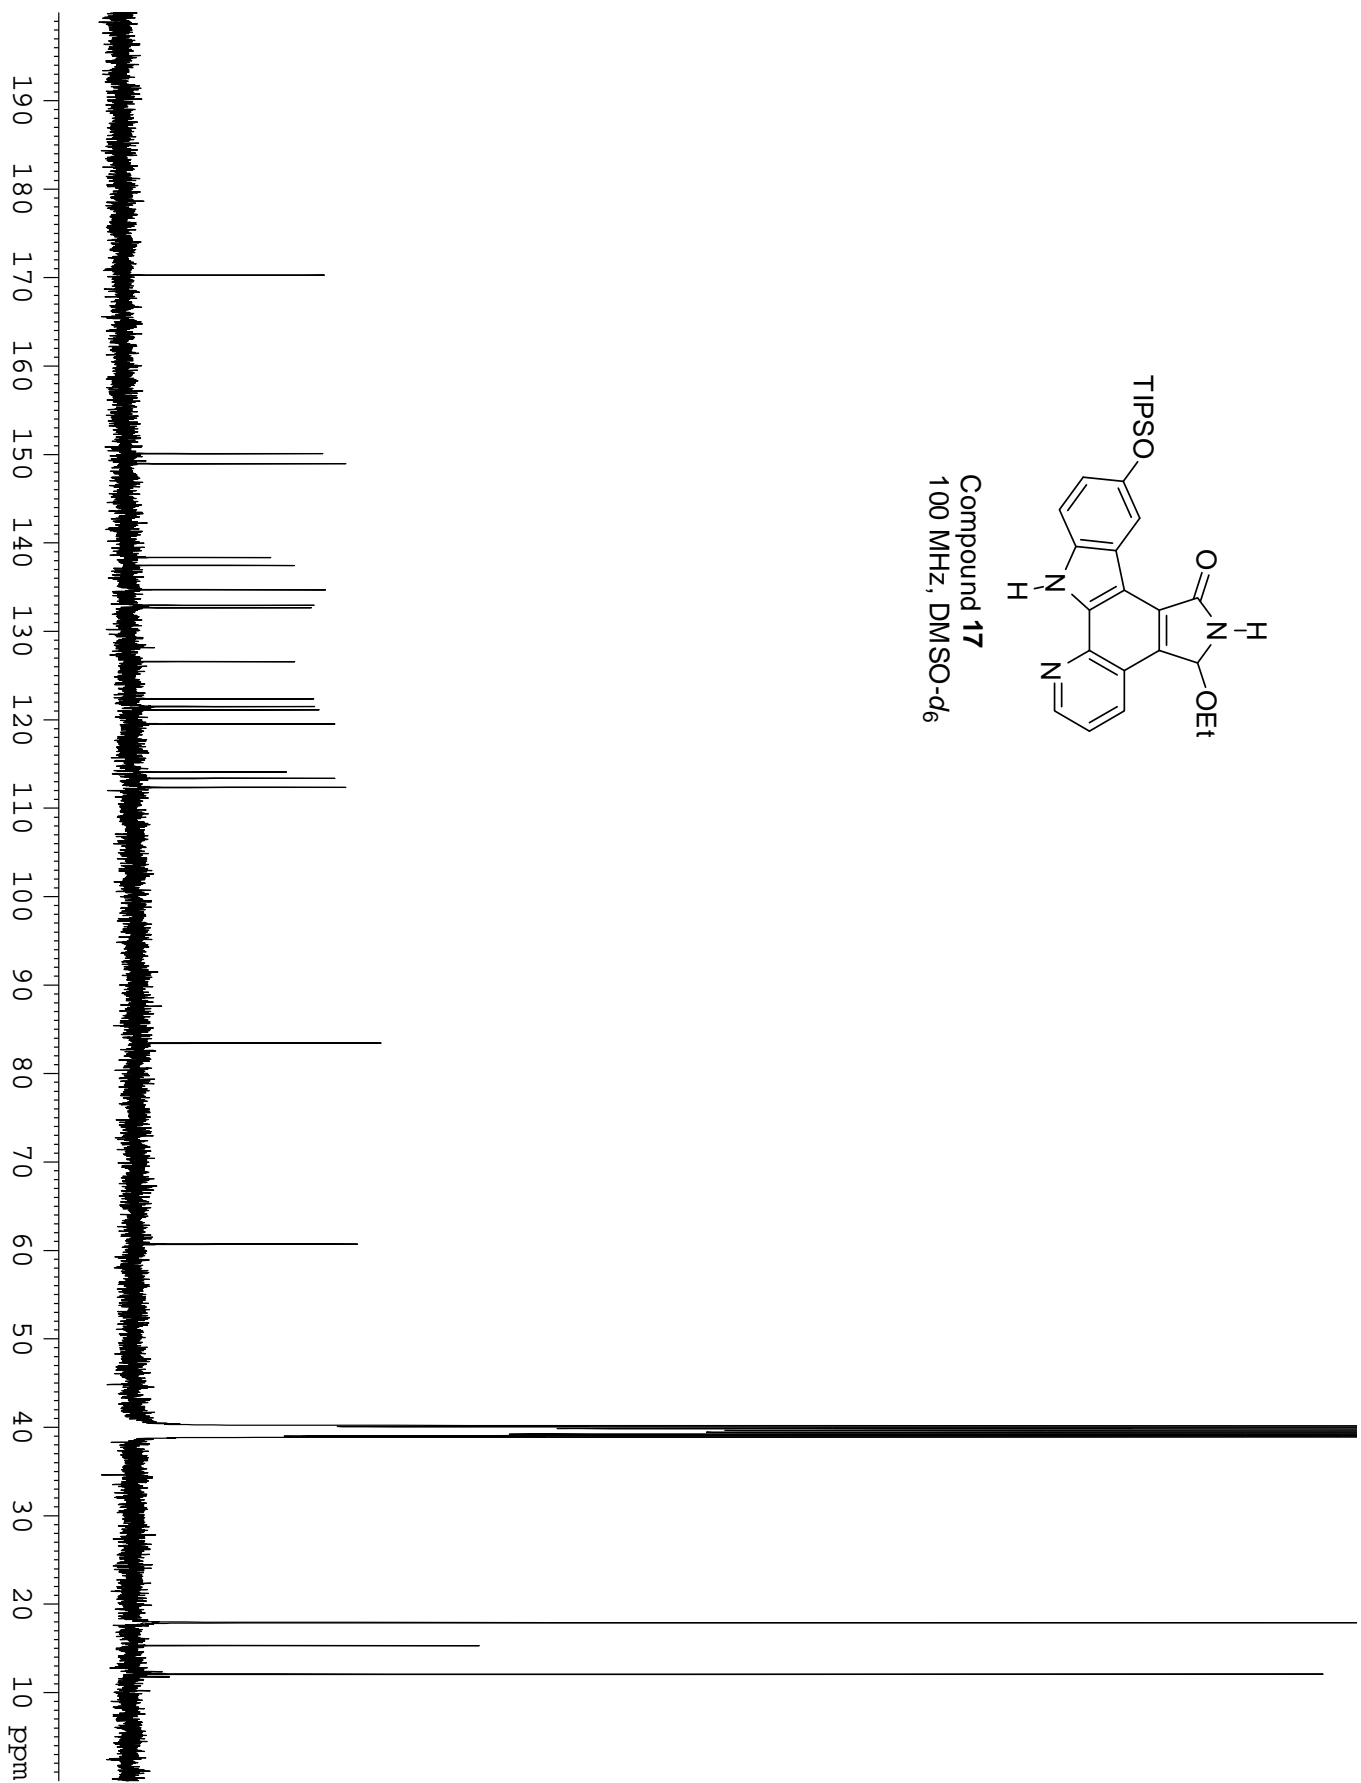

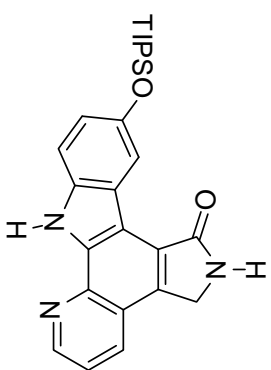

Compound 5  
400 MHz, 373K, DMSO-d<sub>6</sub>

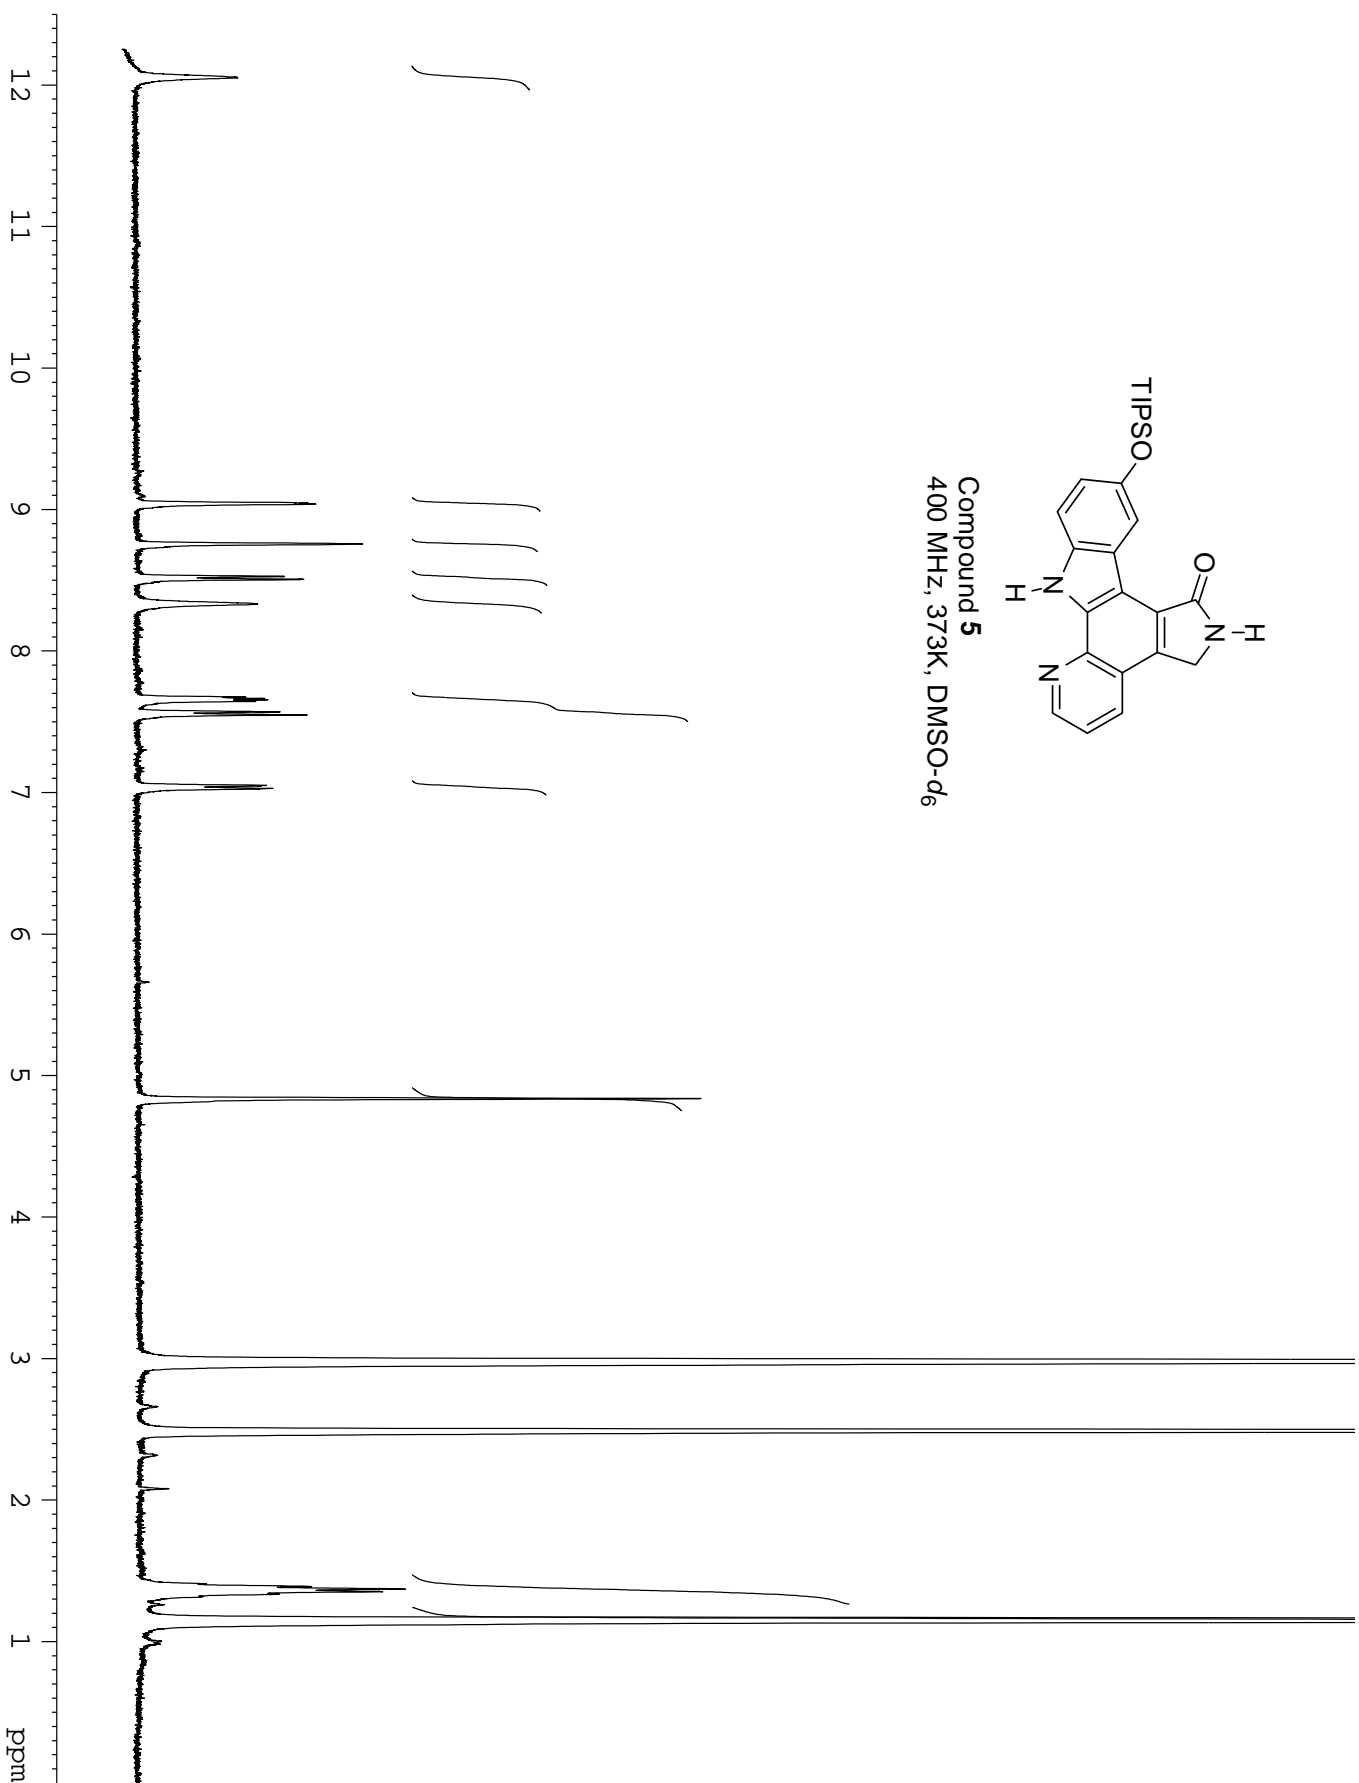

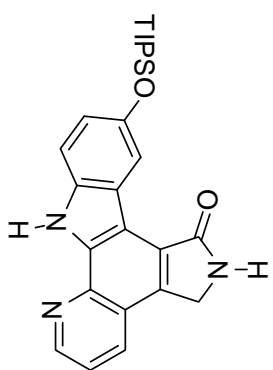

Compound **5**  
100 MHz, 373K, DMSO-*d*<sub>6</sub>

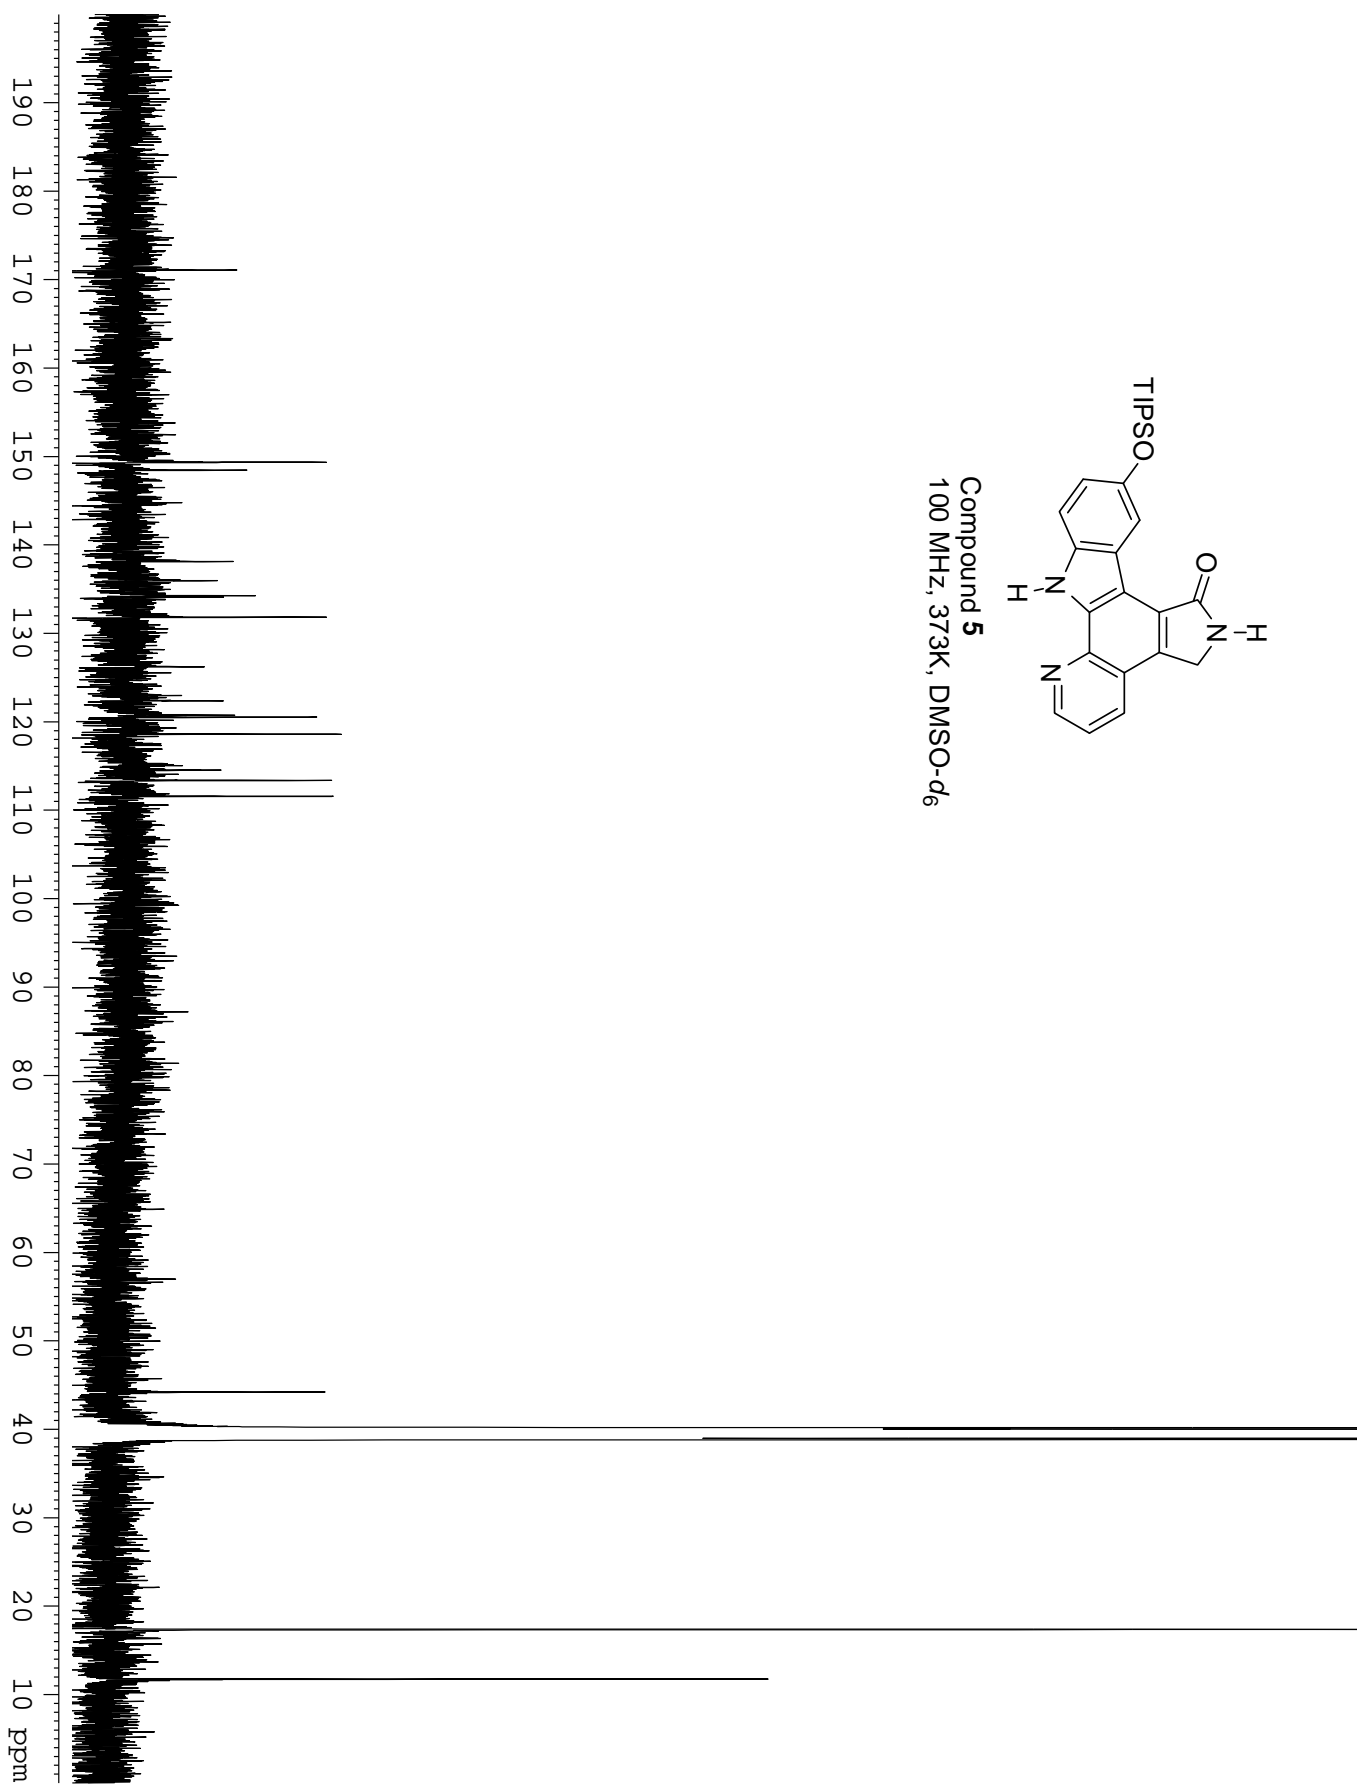

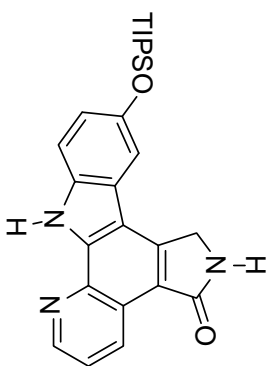

Compound 6  
500 MHz, 373K, DMSO-d<sub>6</sub>

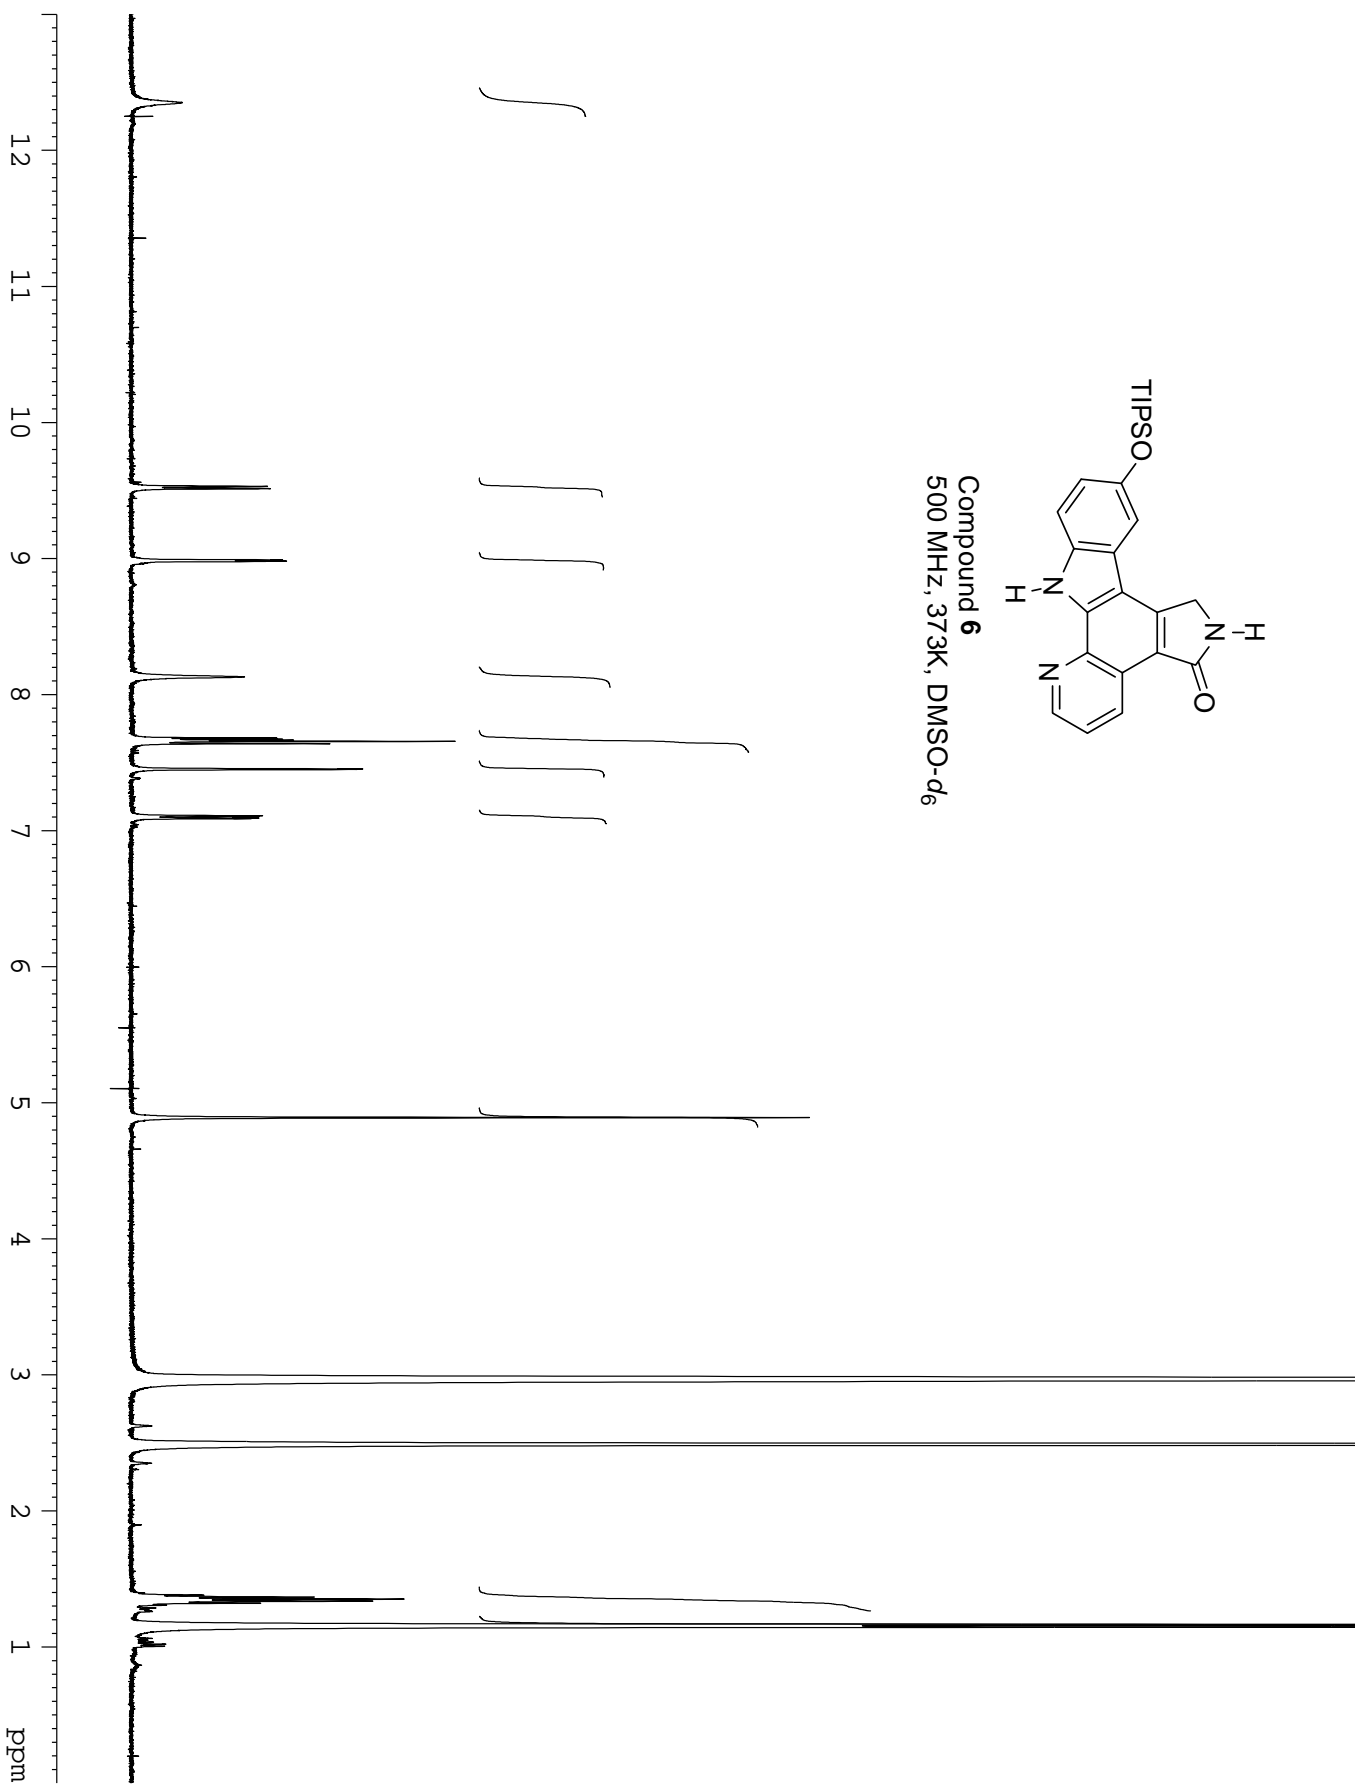

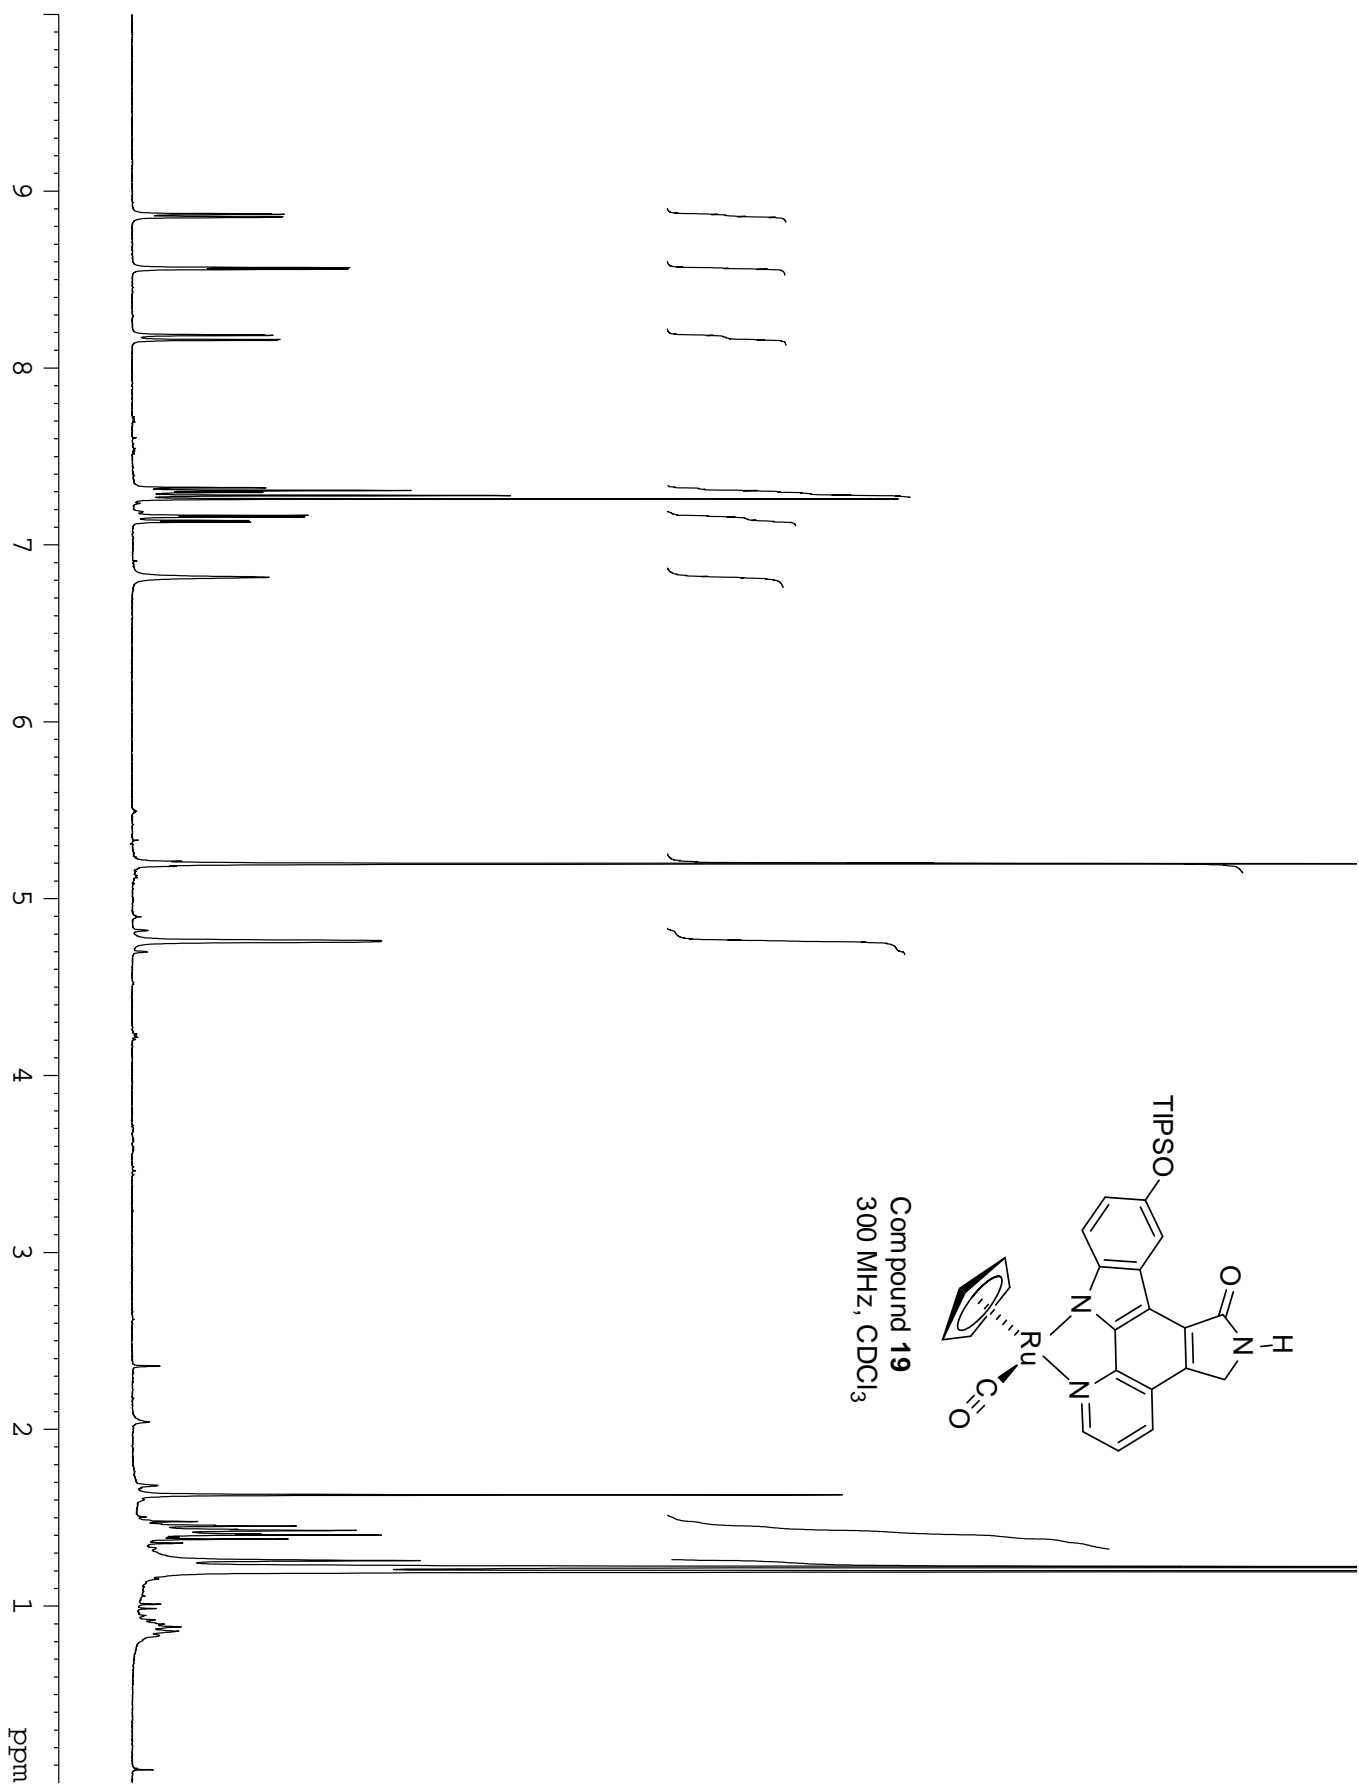

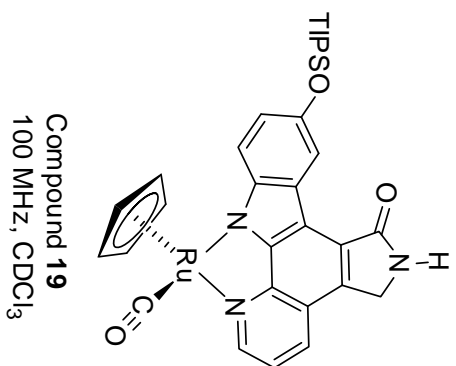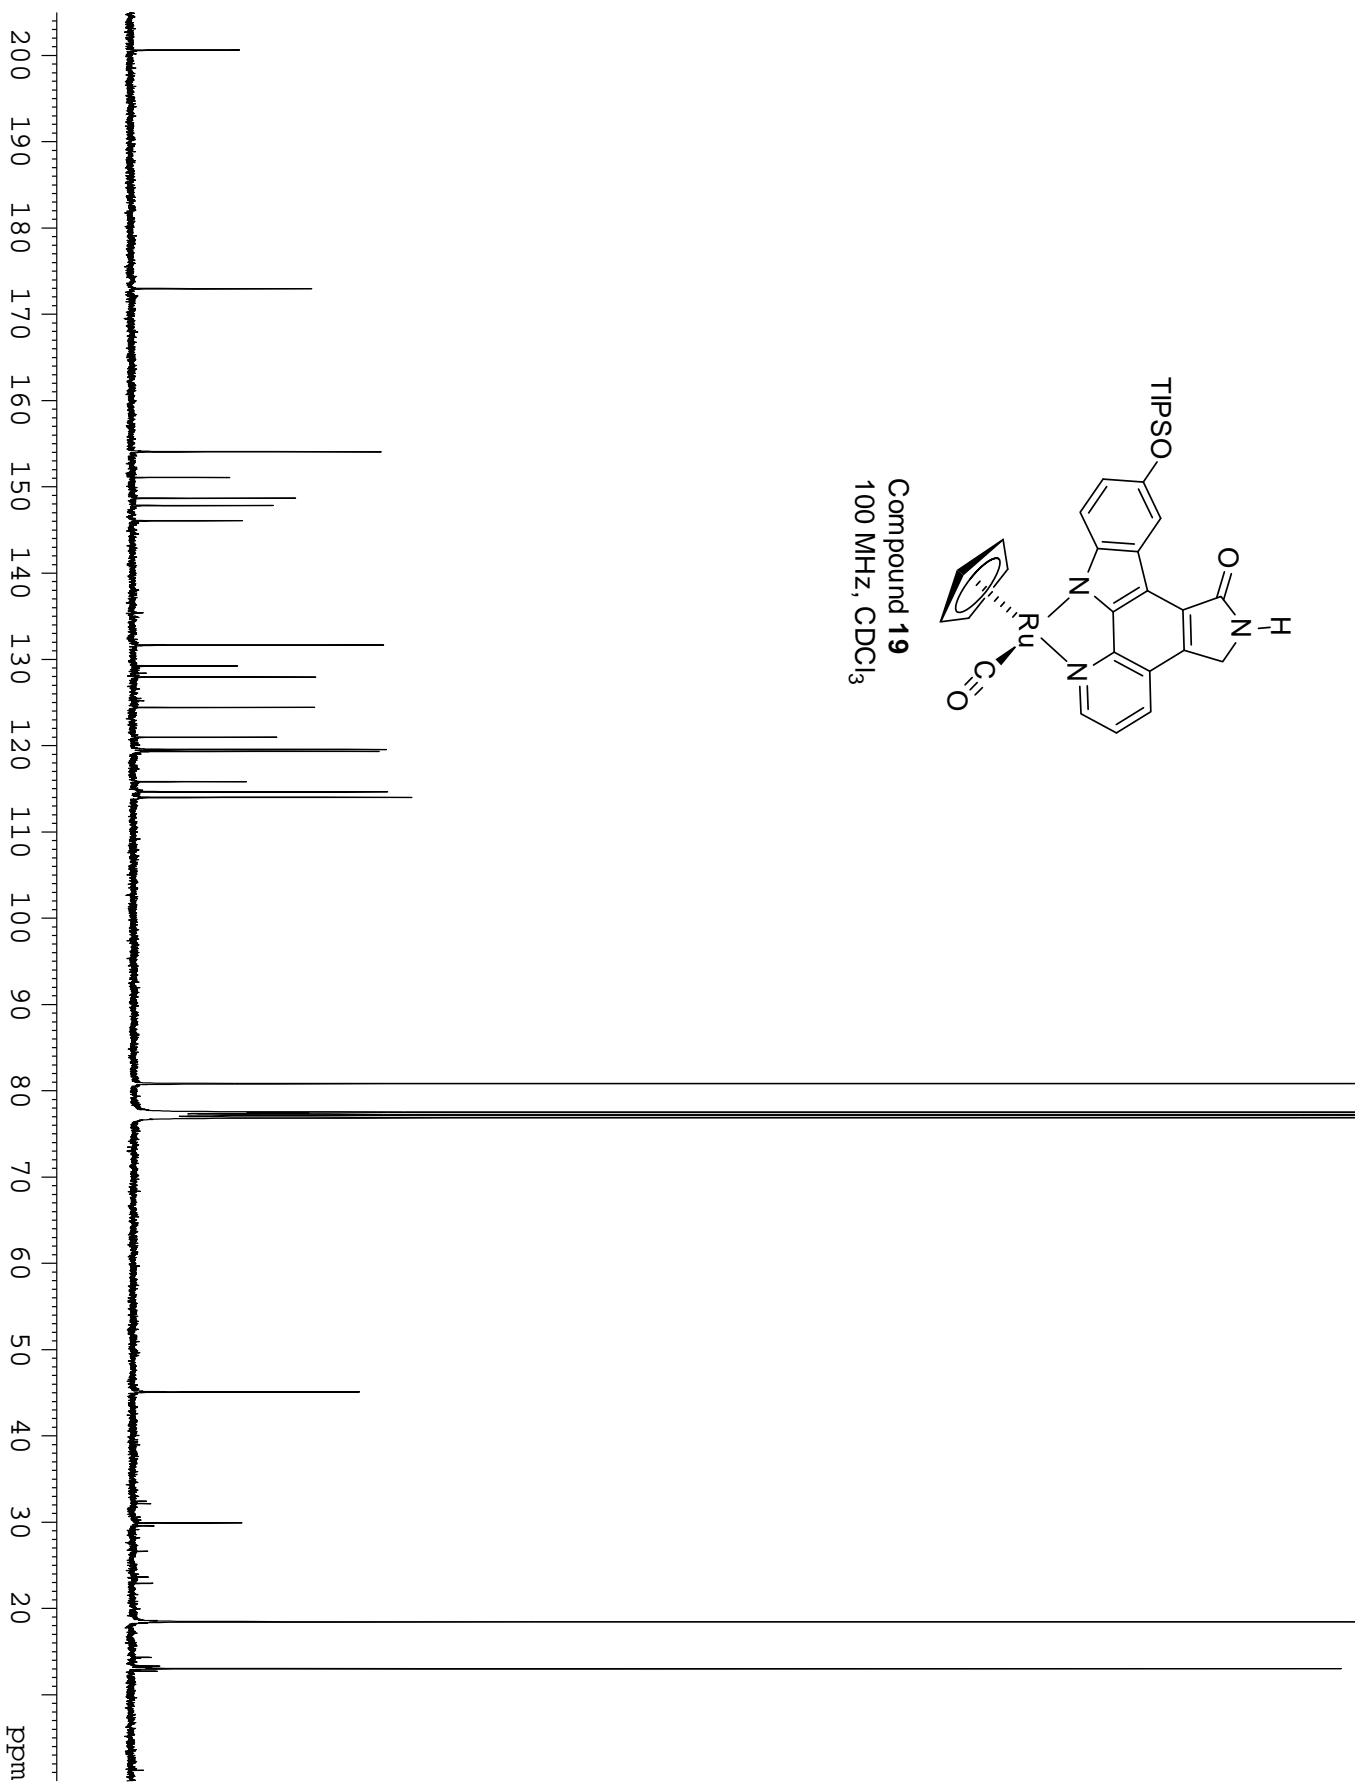

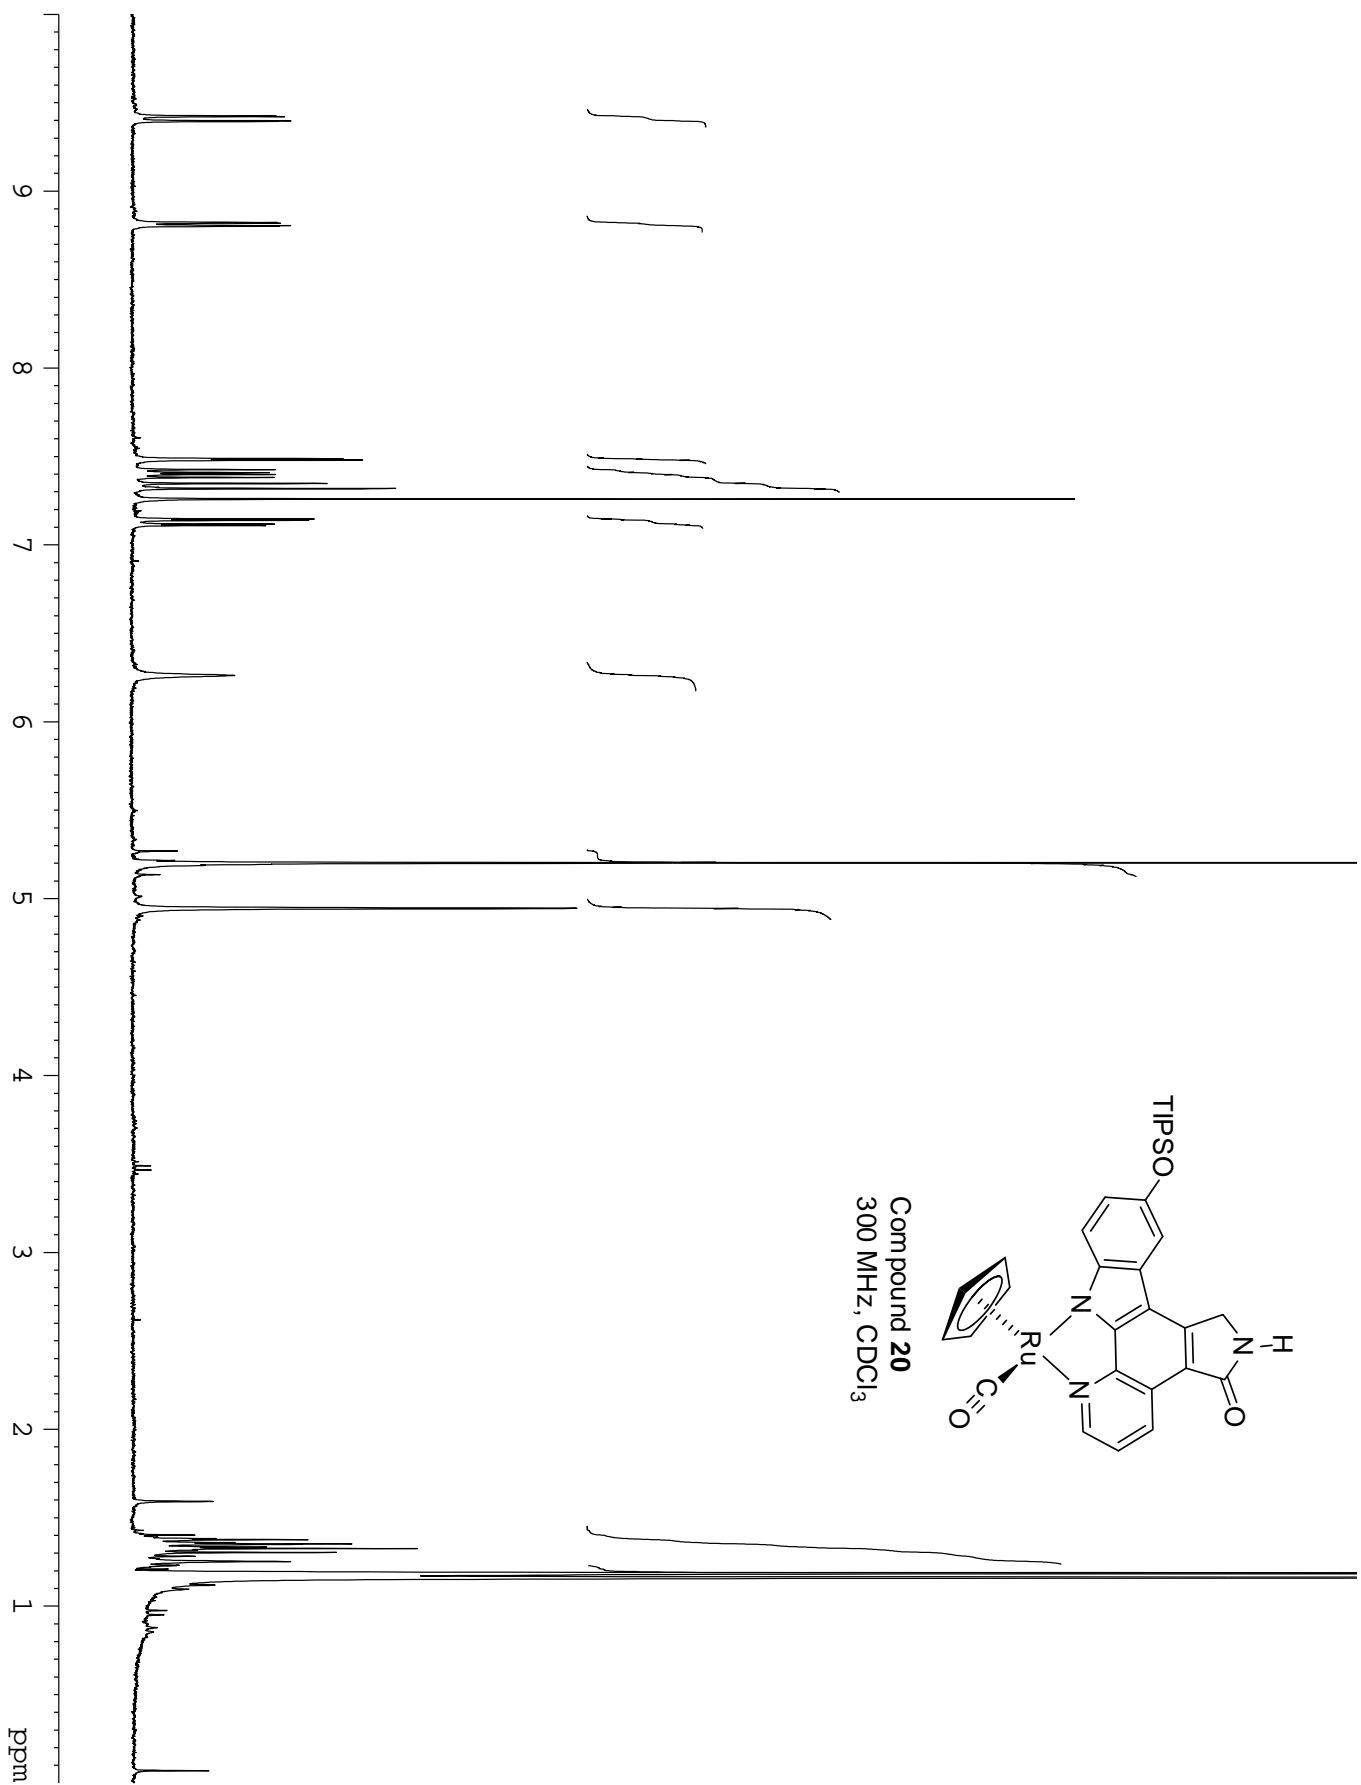

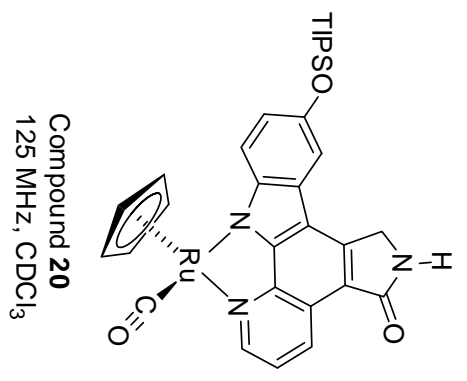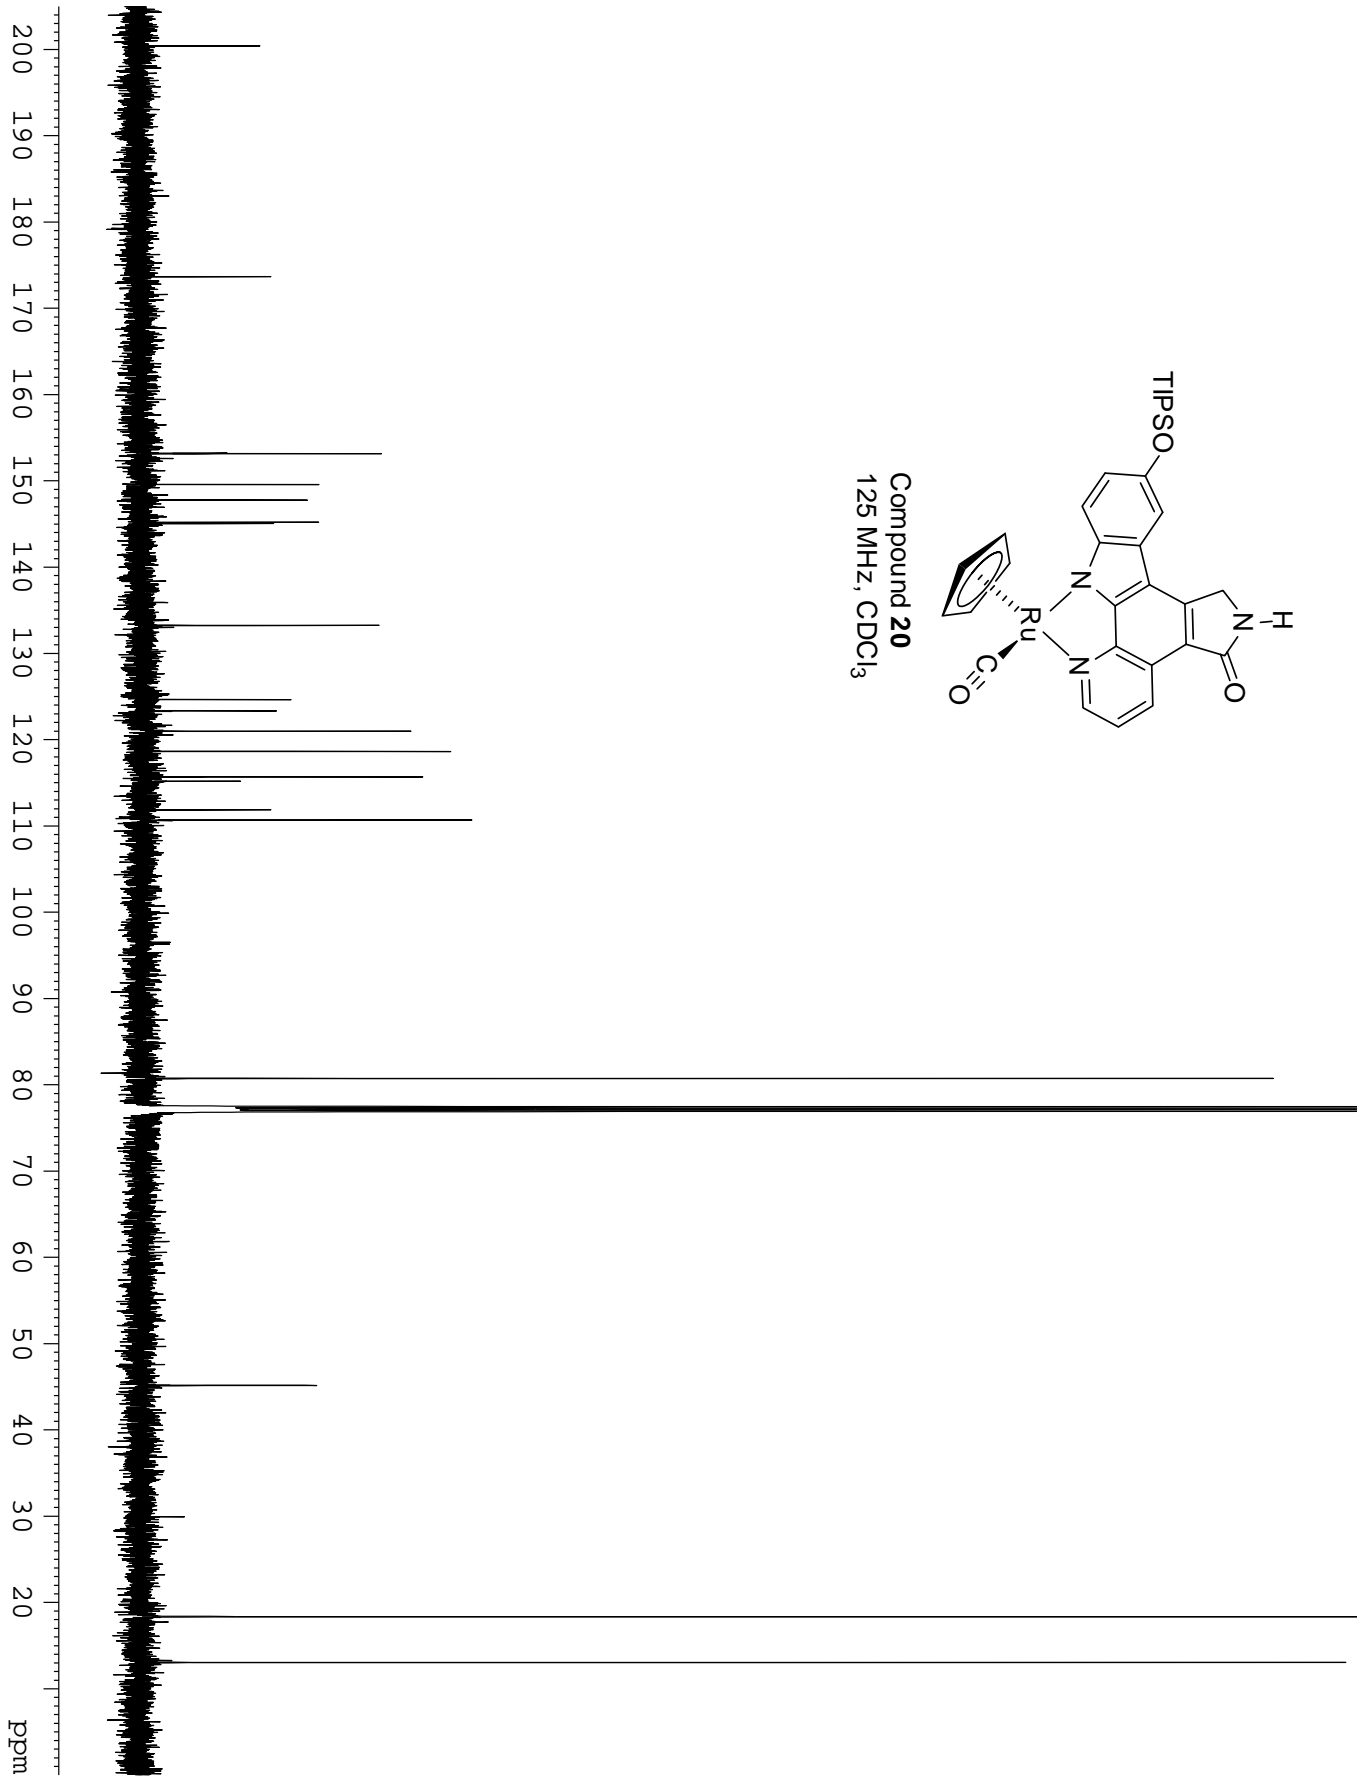



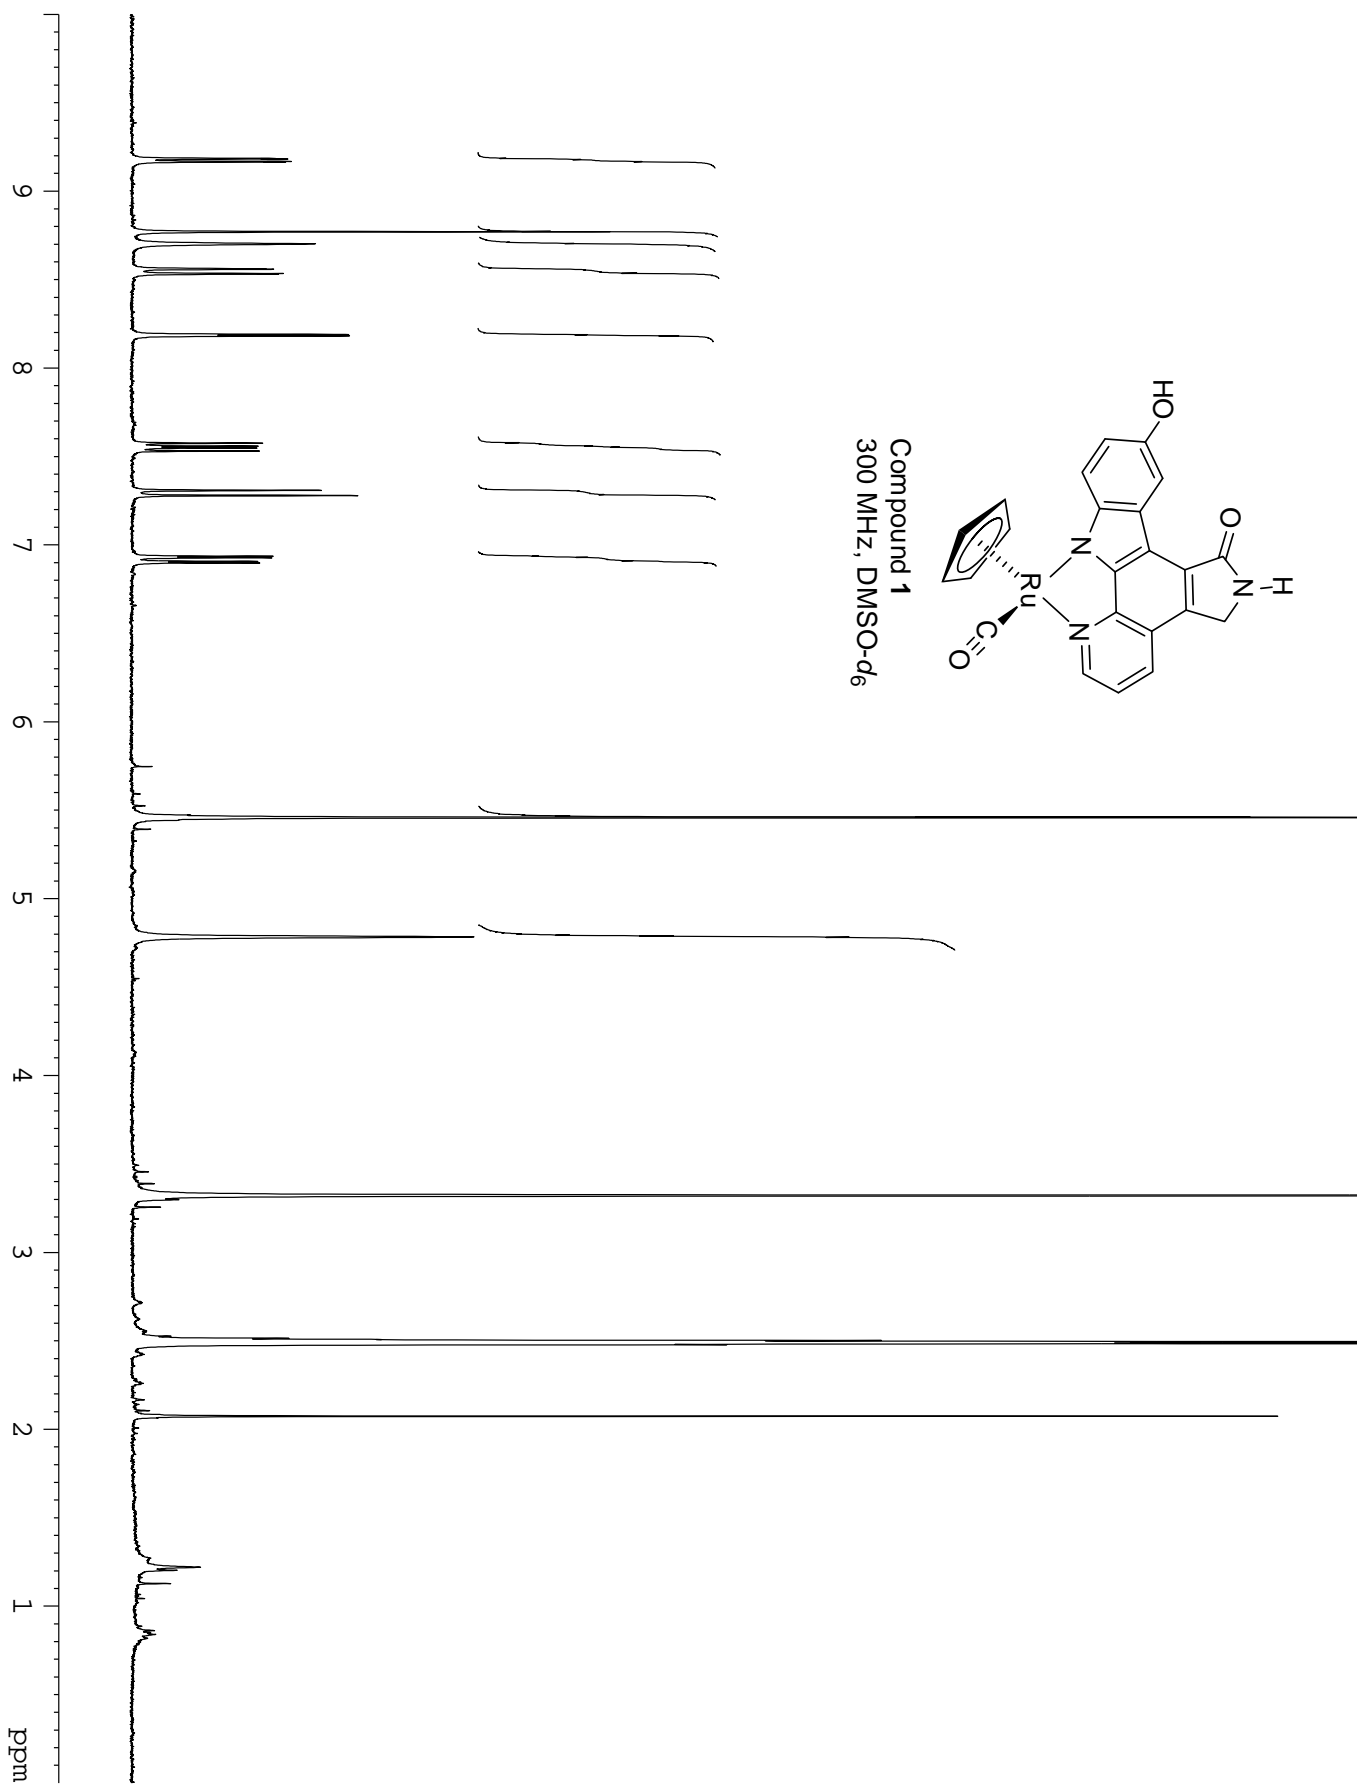

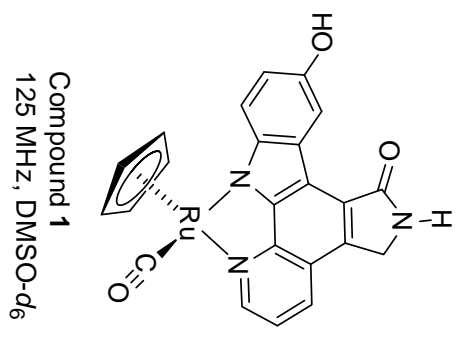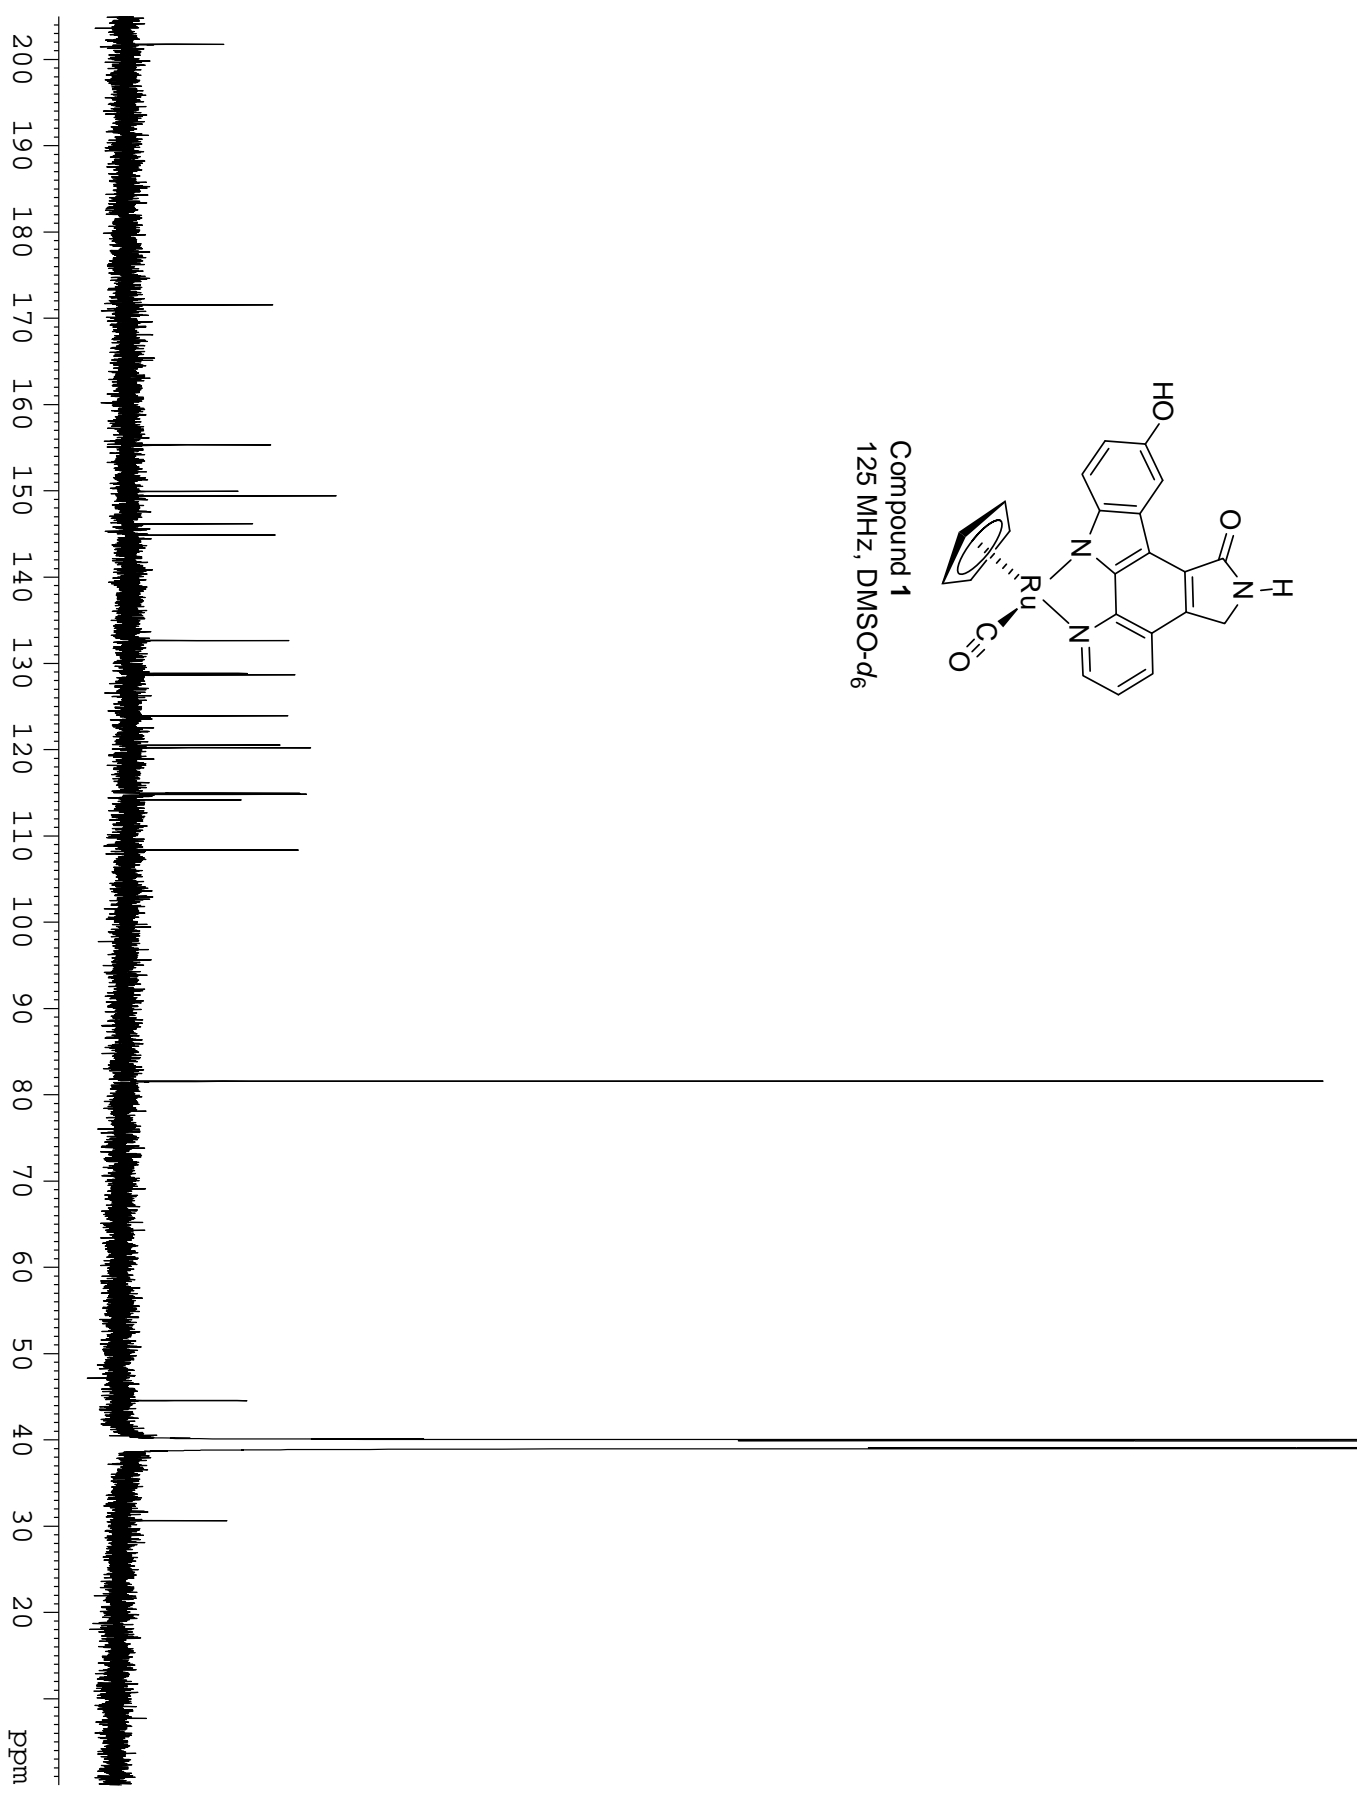

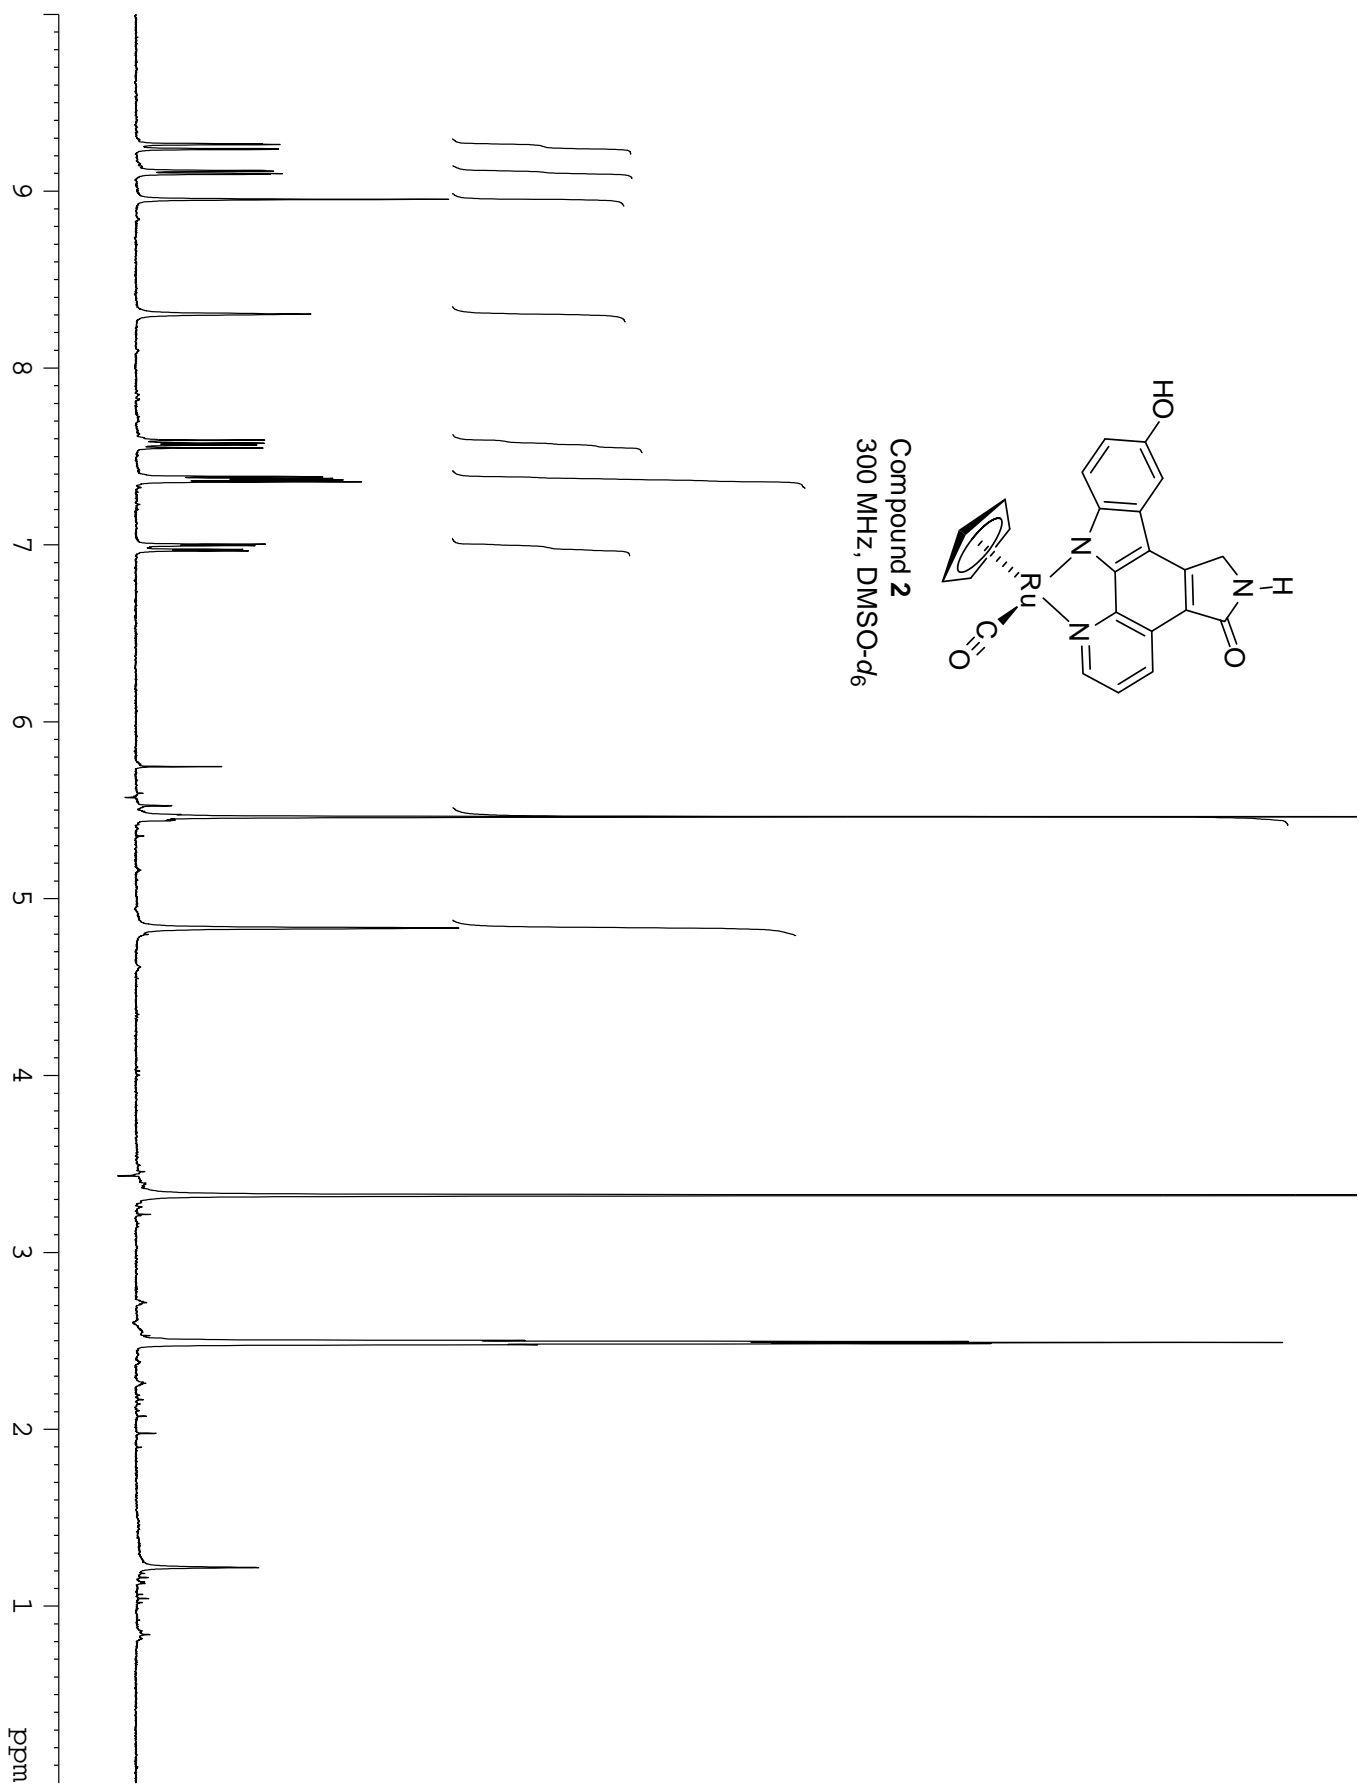

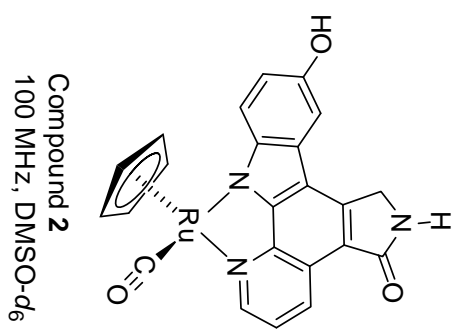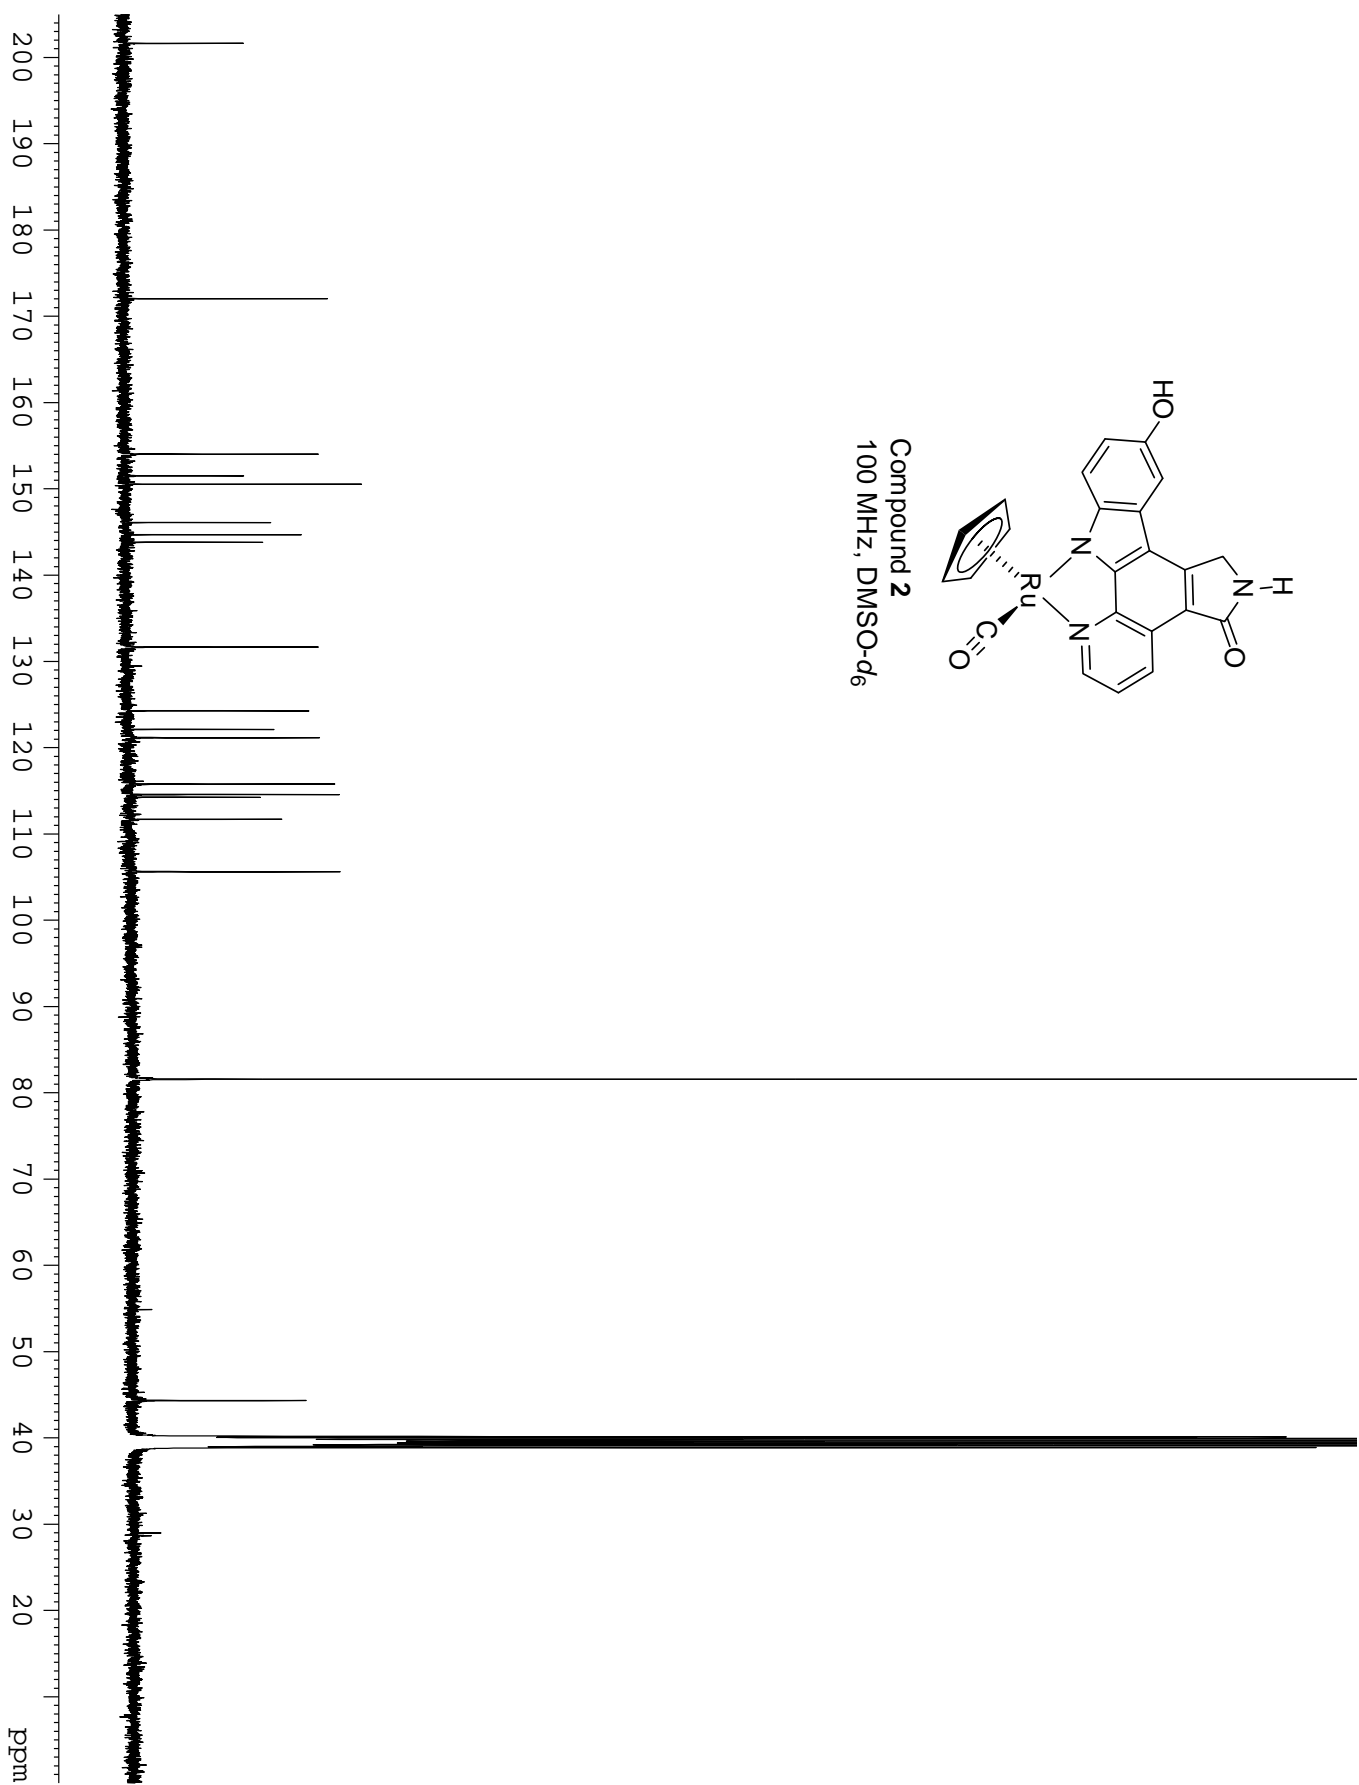

TIPSO

Boc

Compound **23**  
300 MHz, CDCl<sub>3</sub>

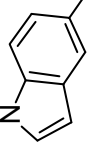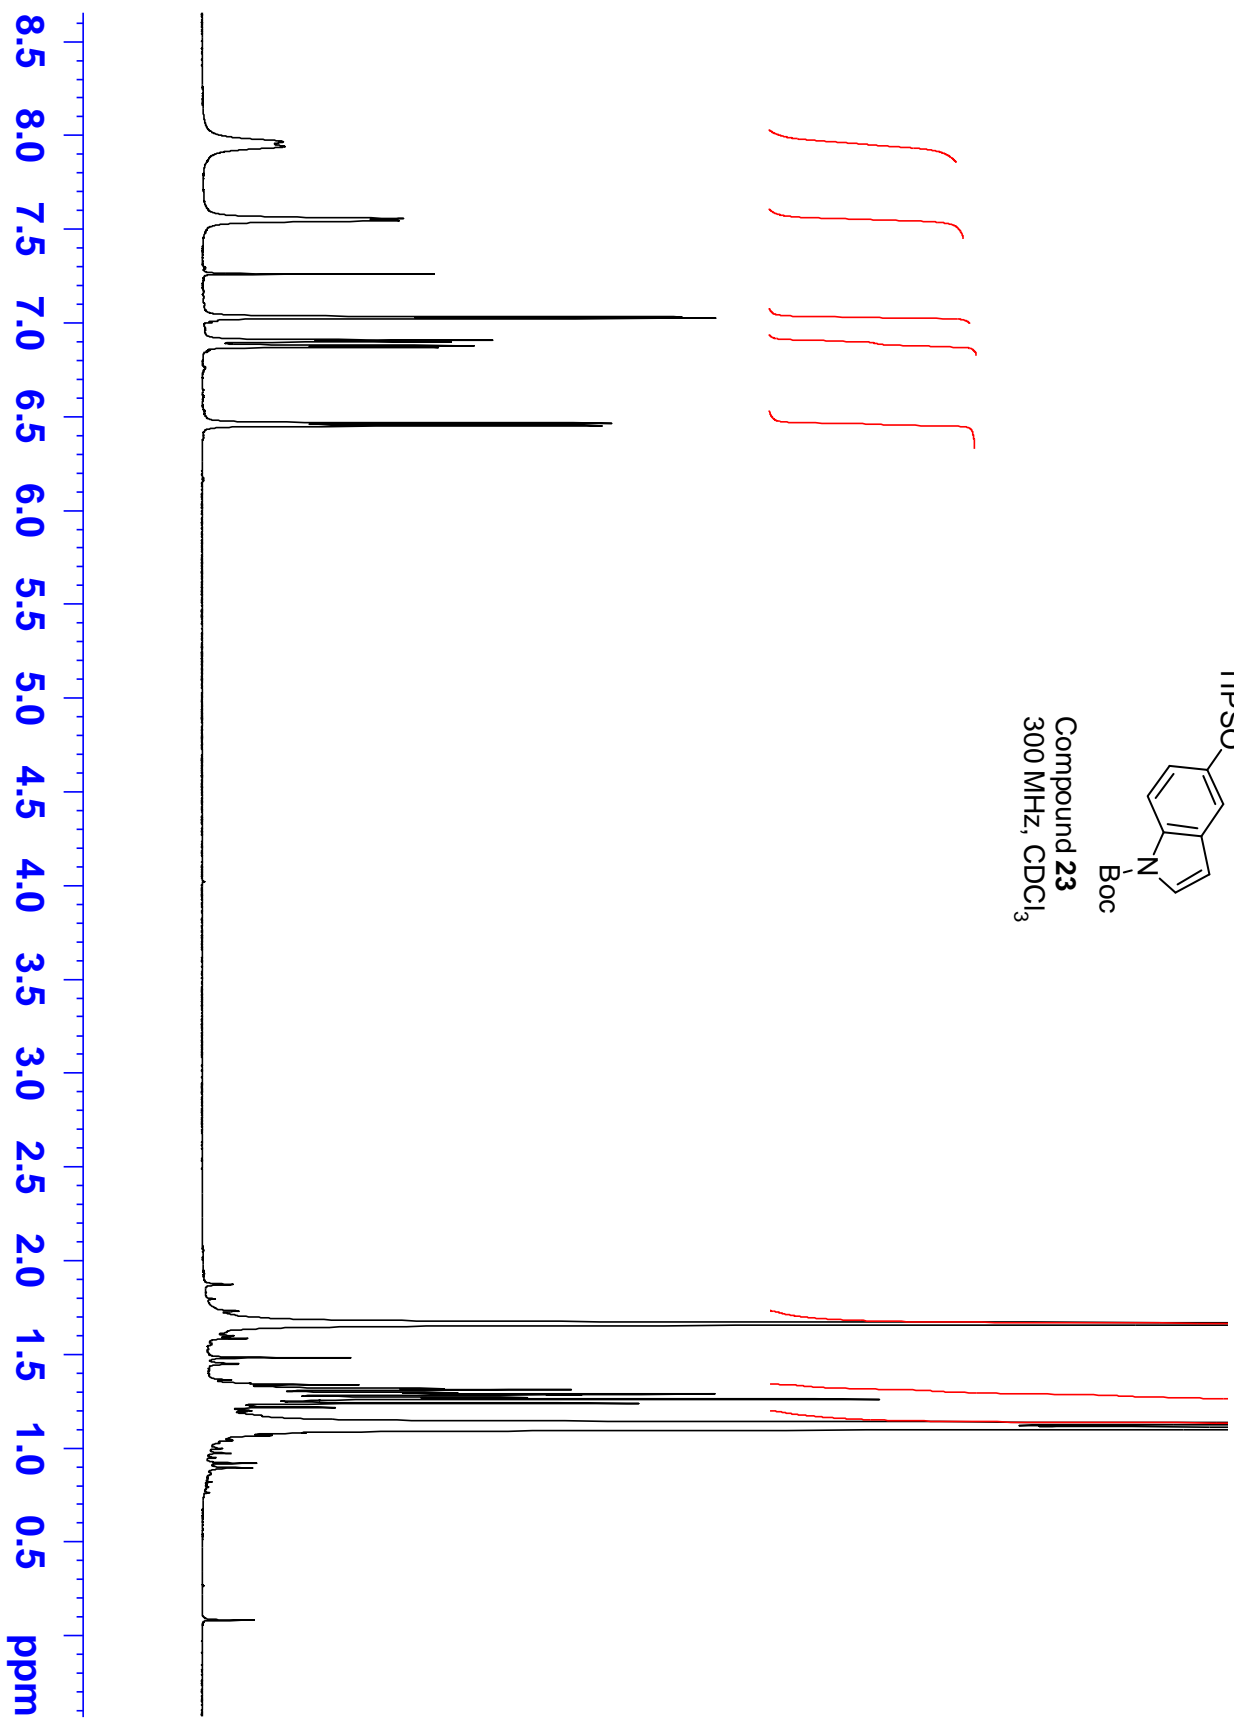

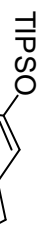

Boc

Compound **23**  
75 MHz, CDCl<sub>3</sub>

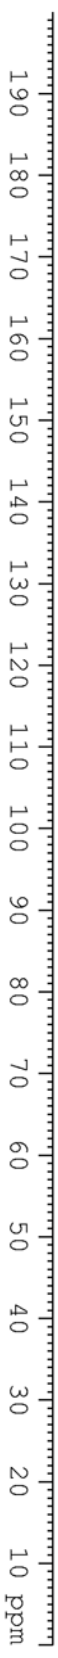

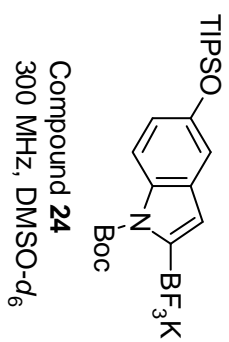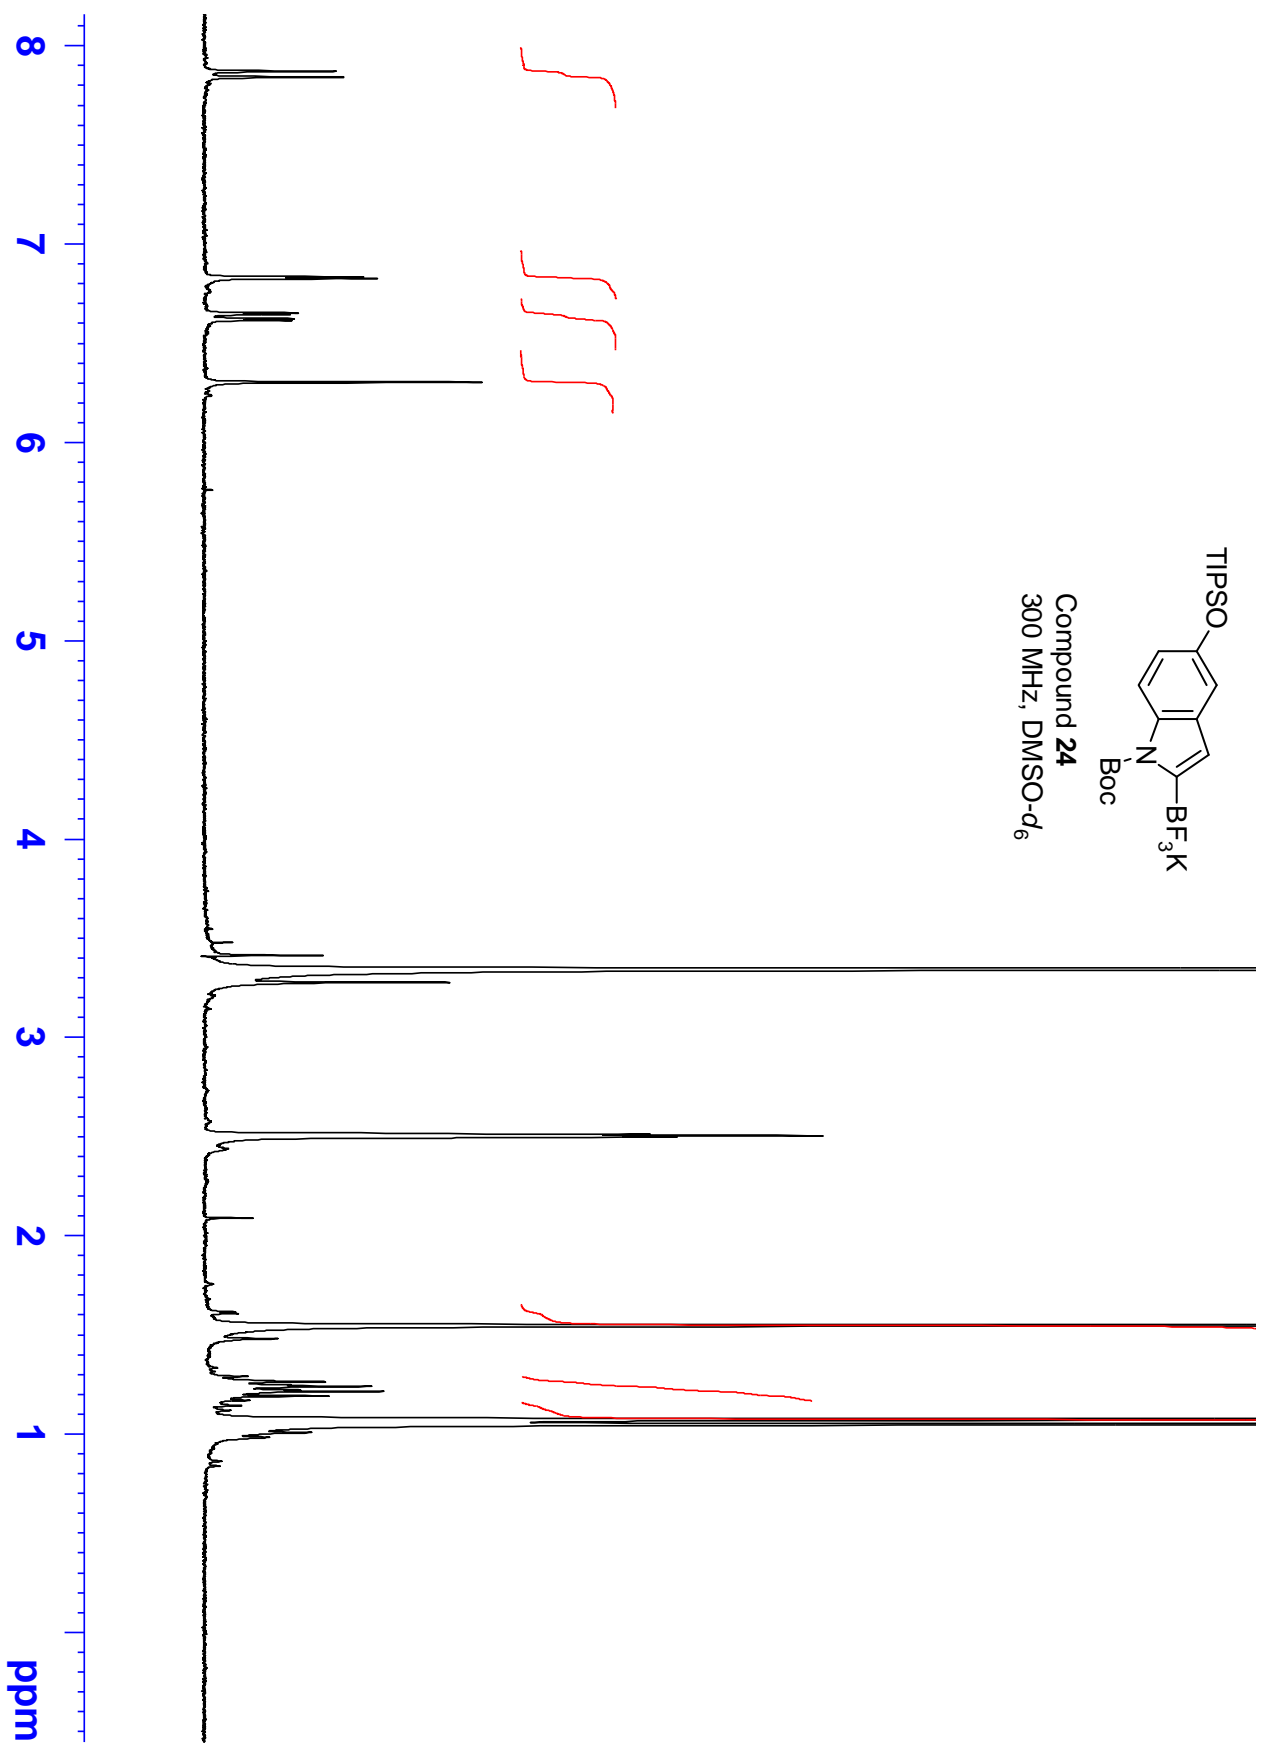

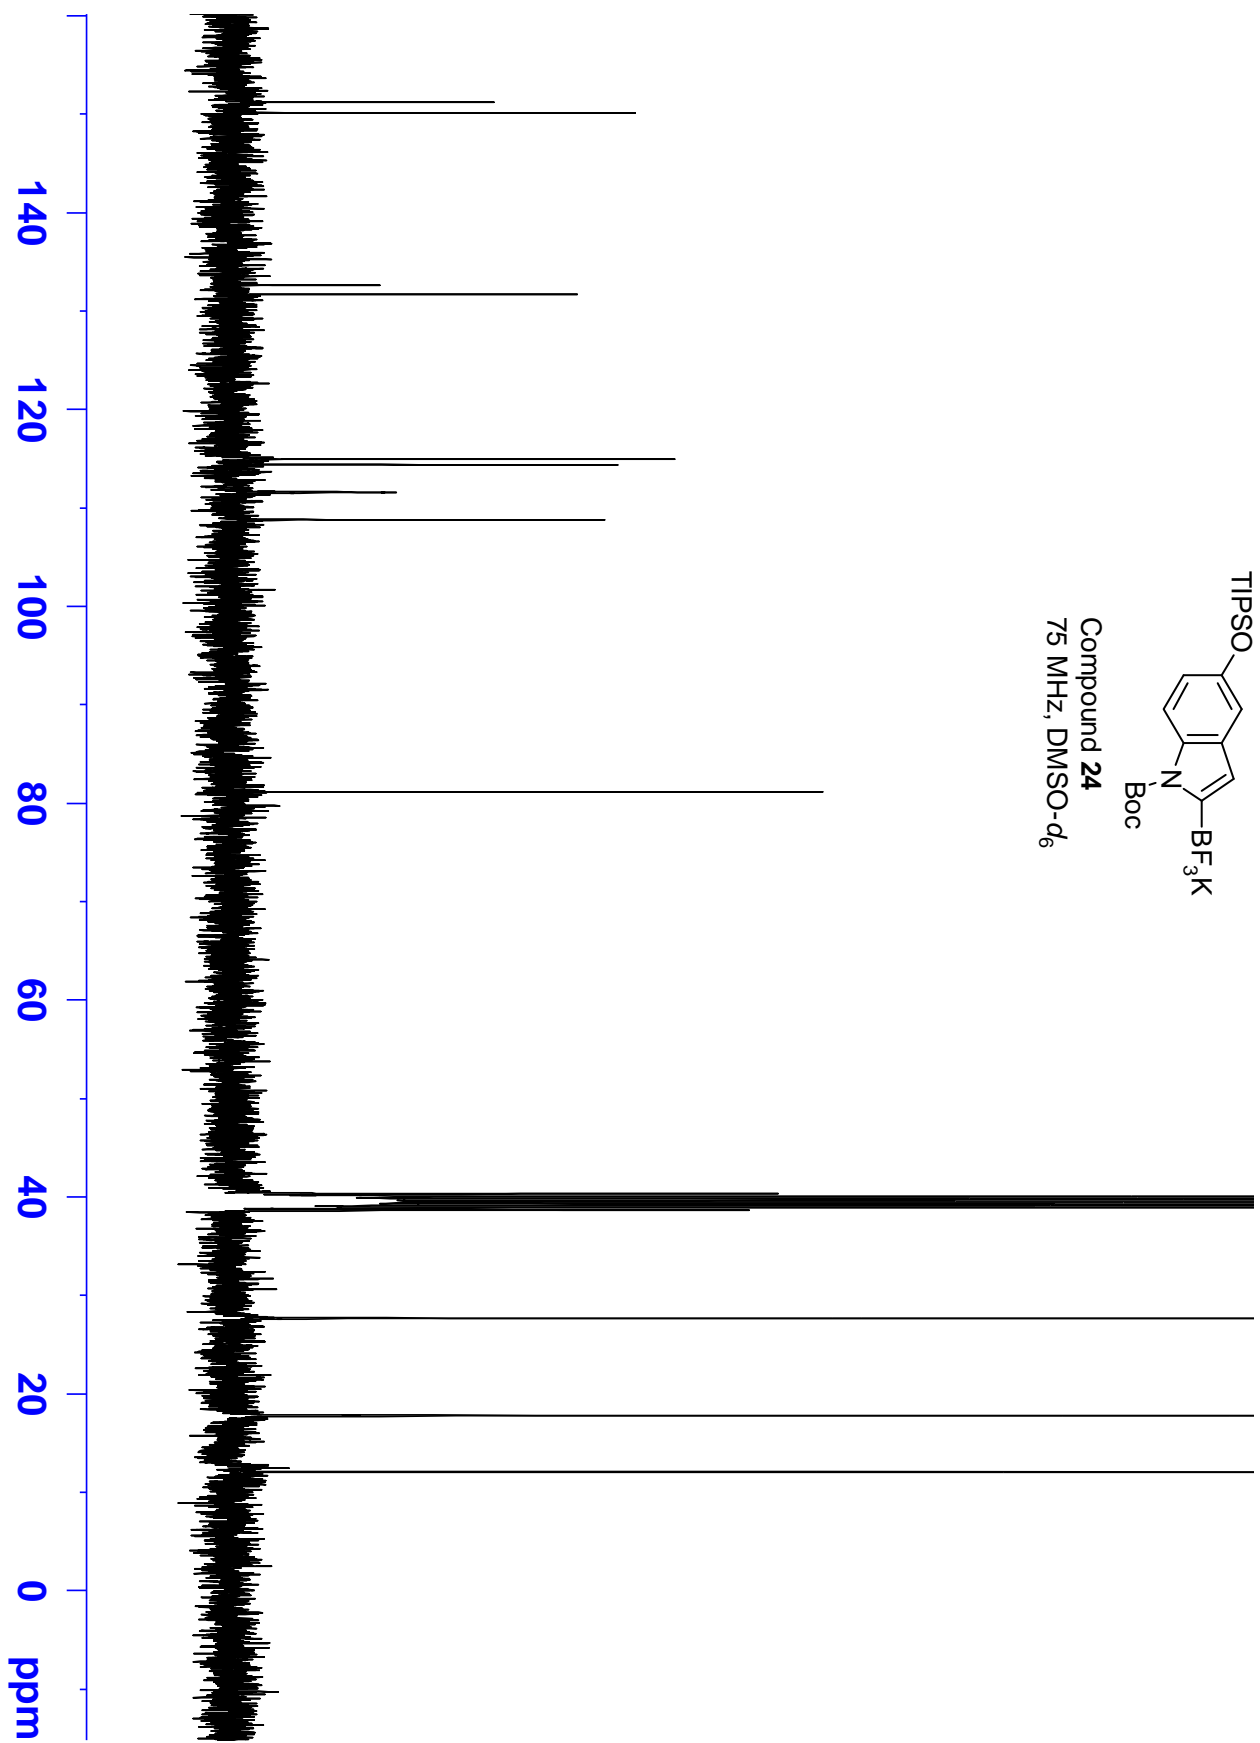



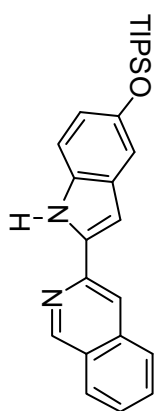

Compound **26**  
300 MHz, CDCl<sub>3</sub>

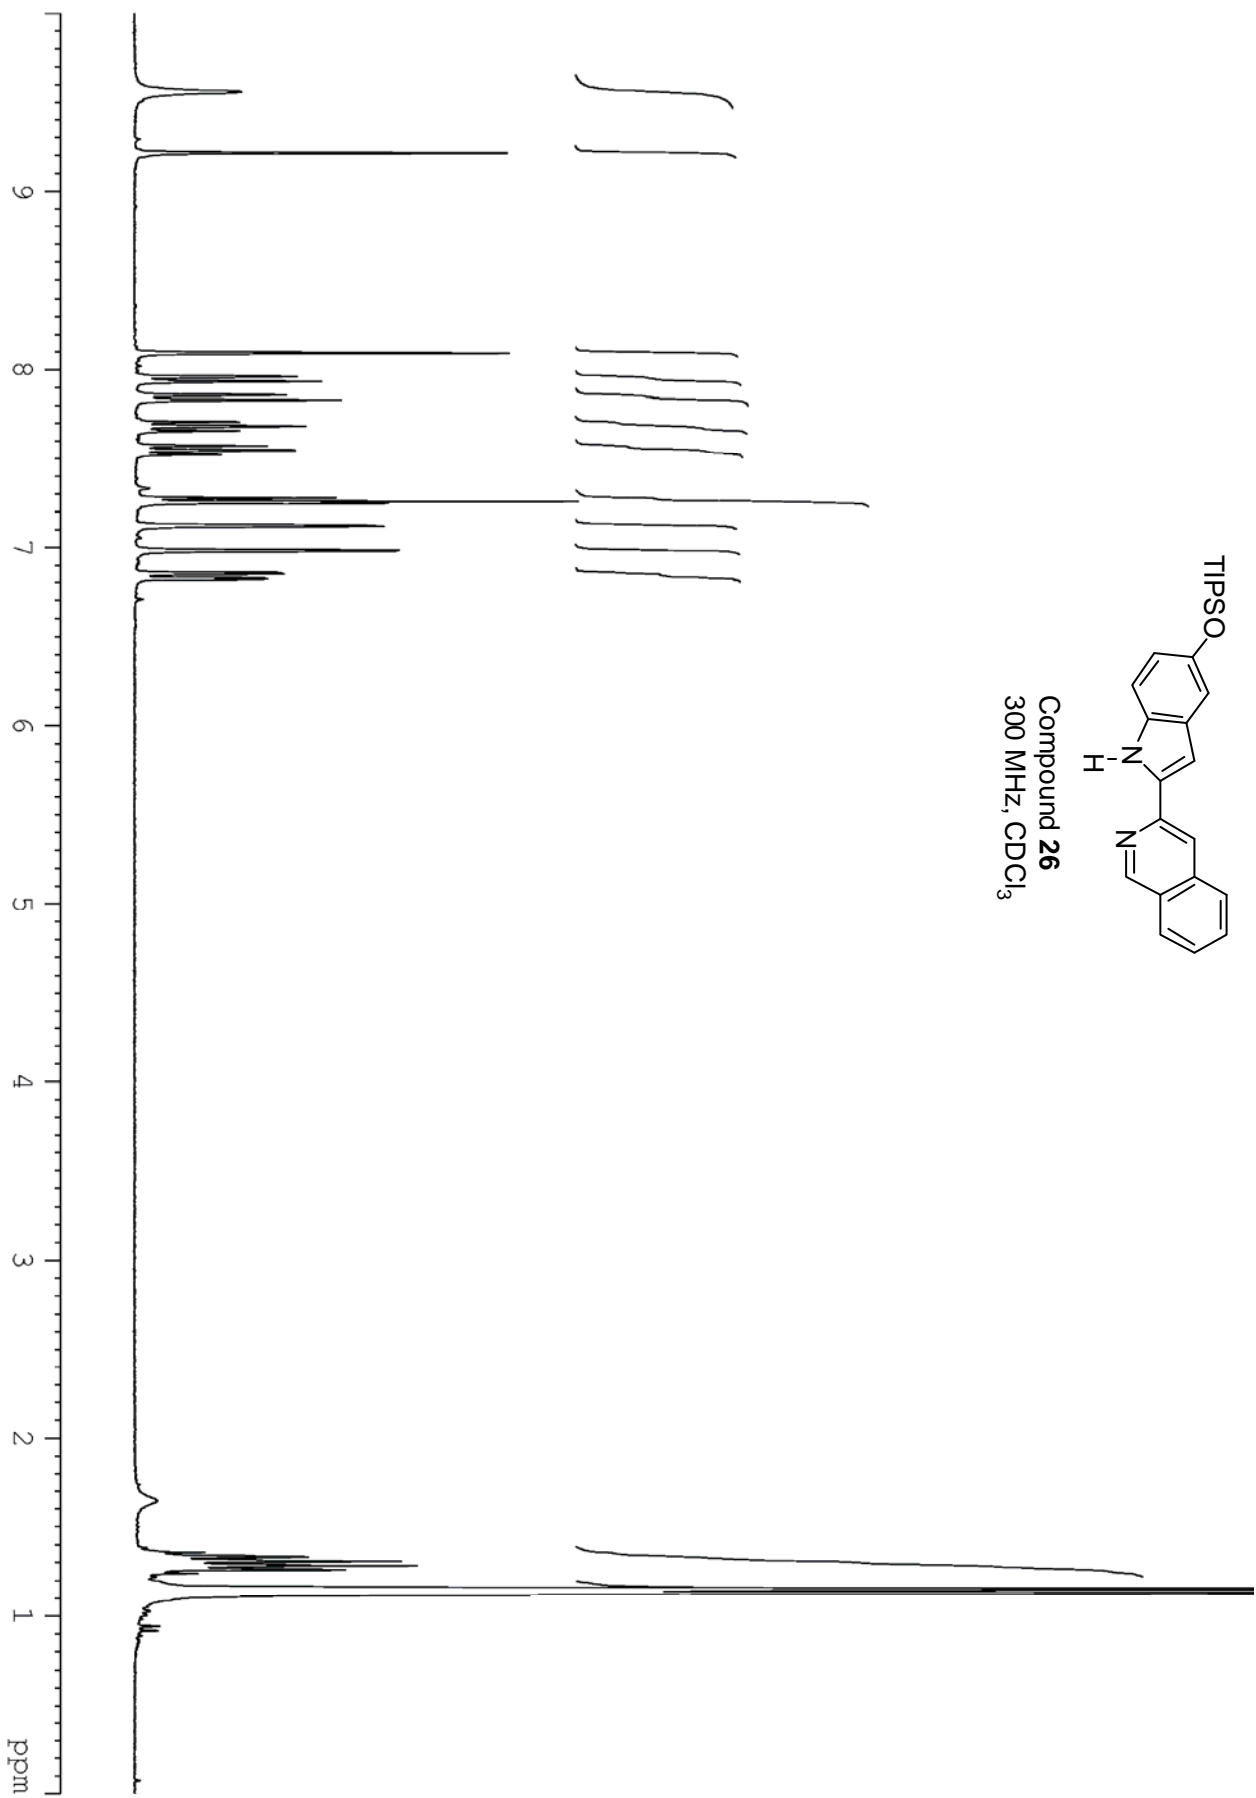

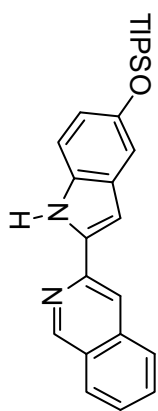

Compound 26  
75 MHz, CDCl<sub>3</sub>

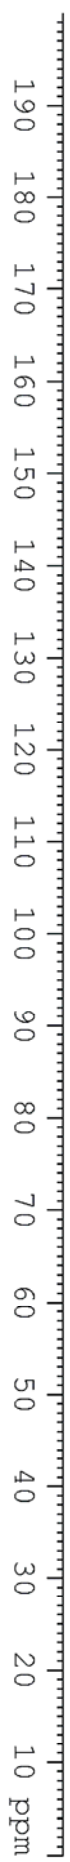

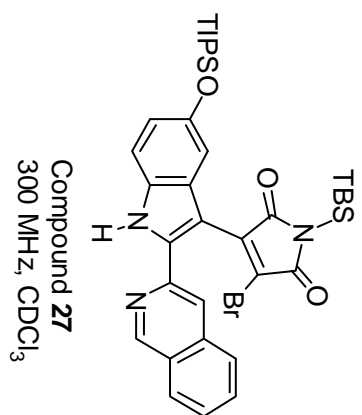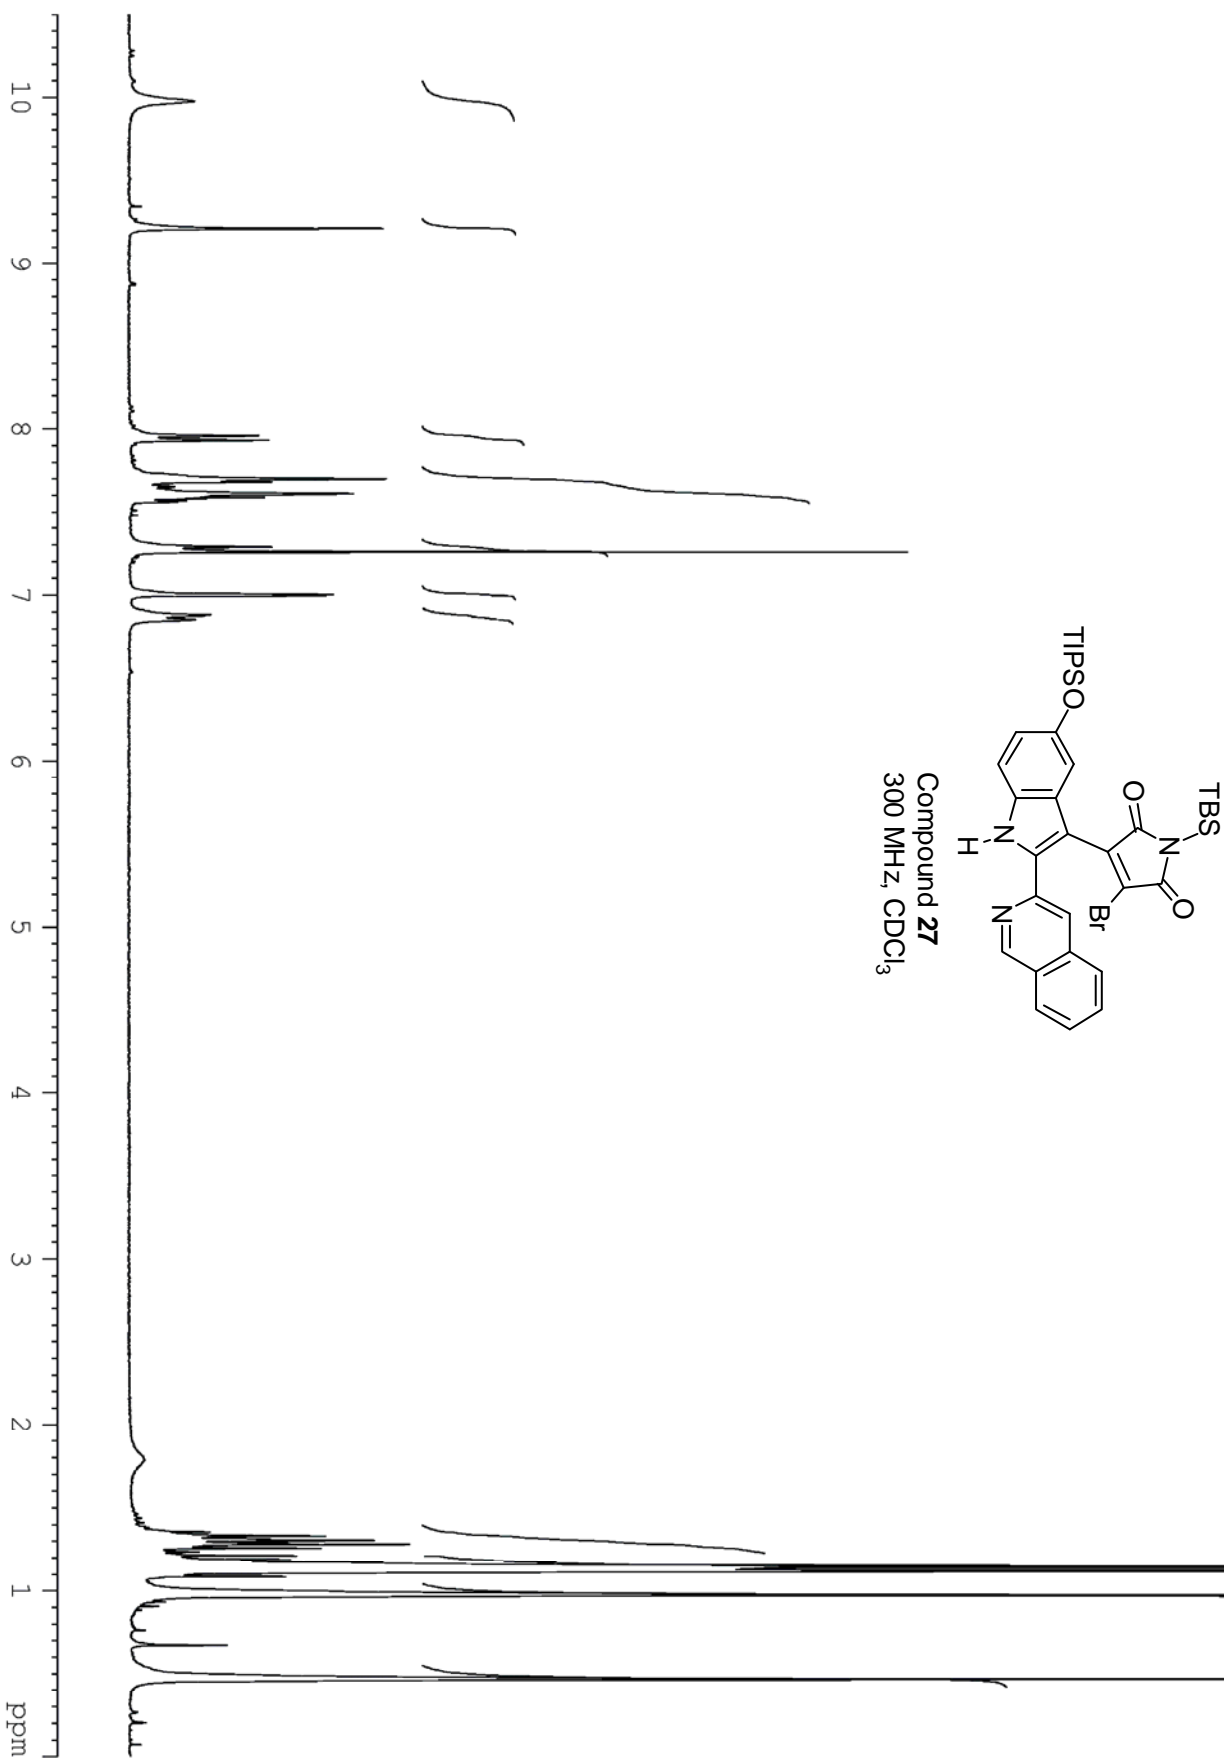

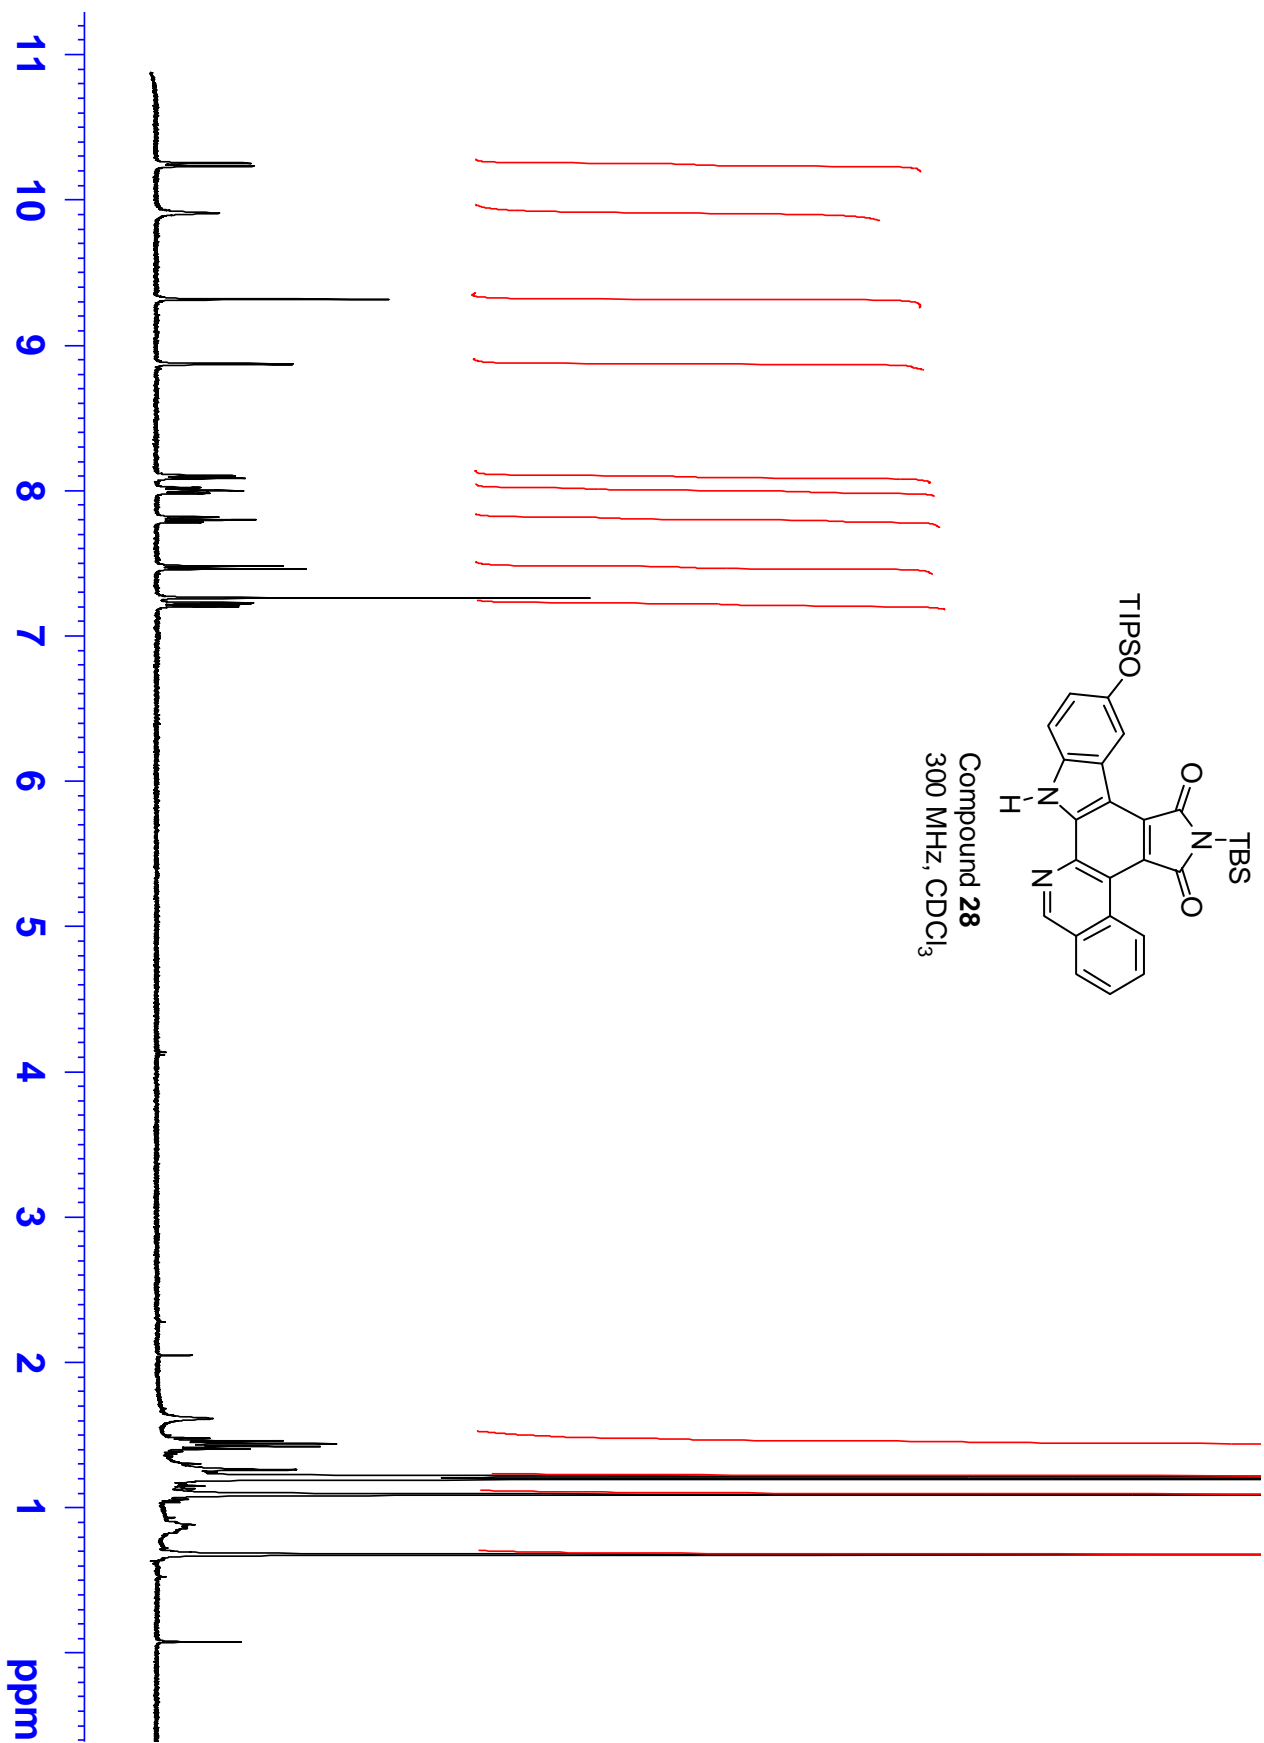

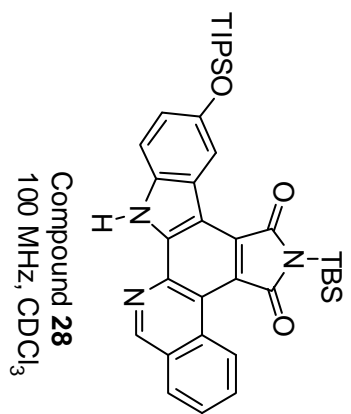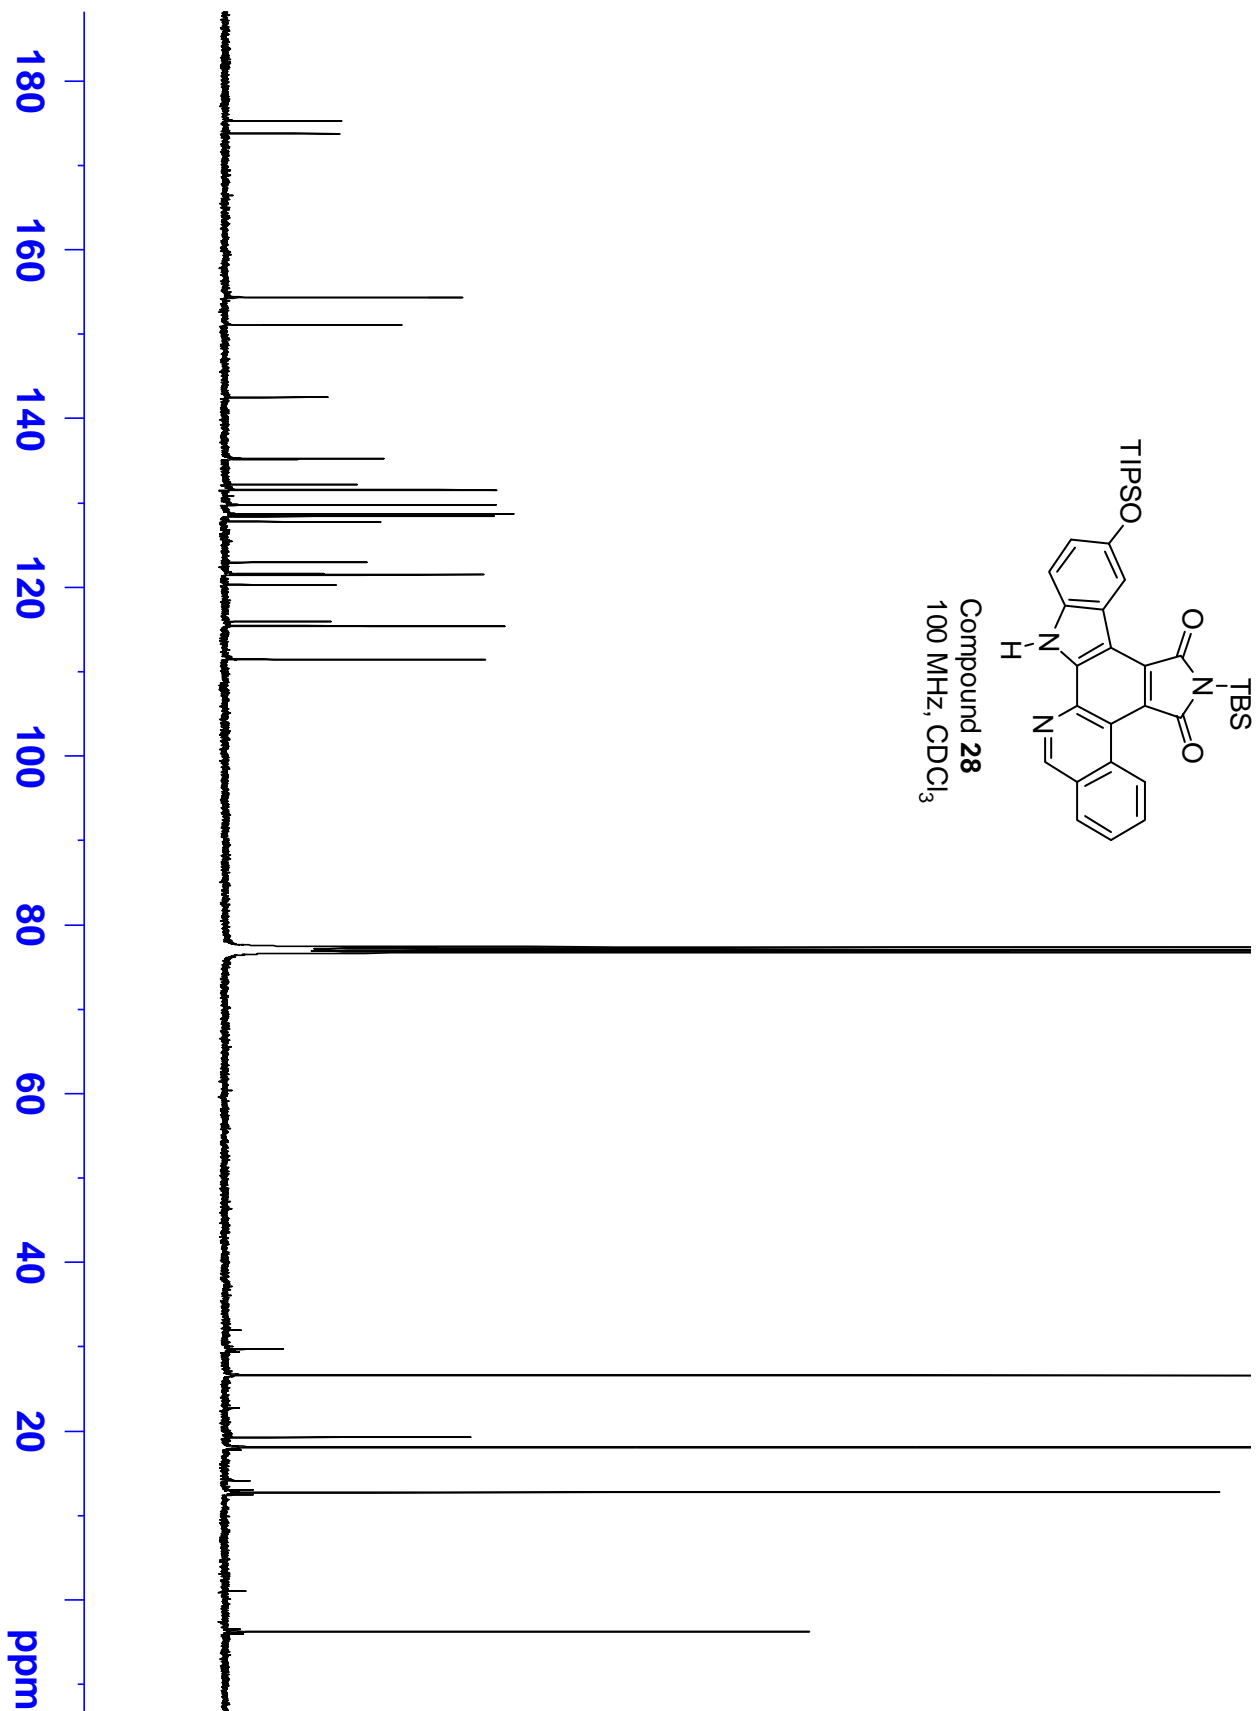

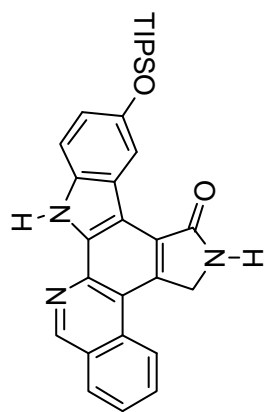

Compound 29  
300 MHz, DMSO-d<sub>6</sub>

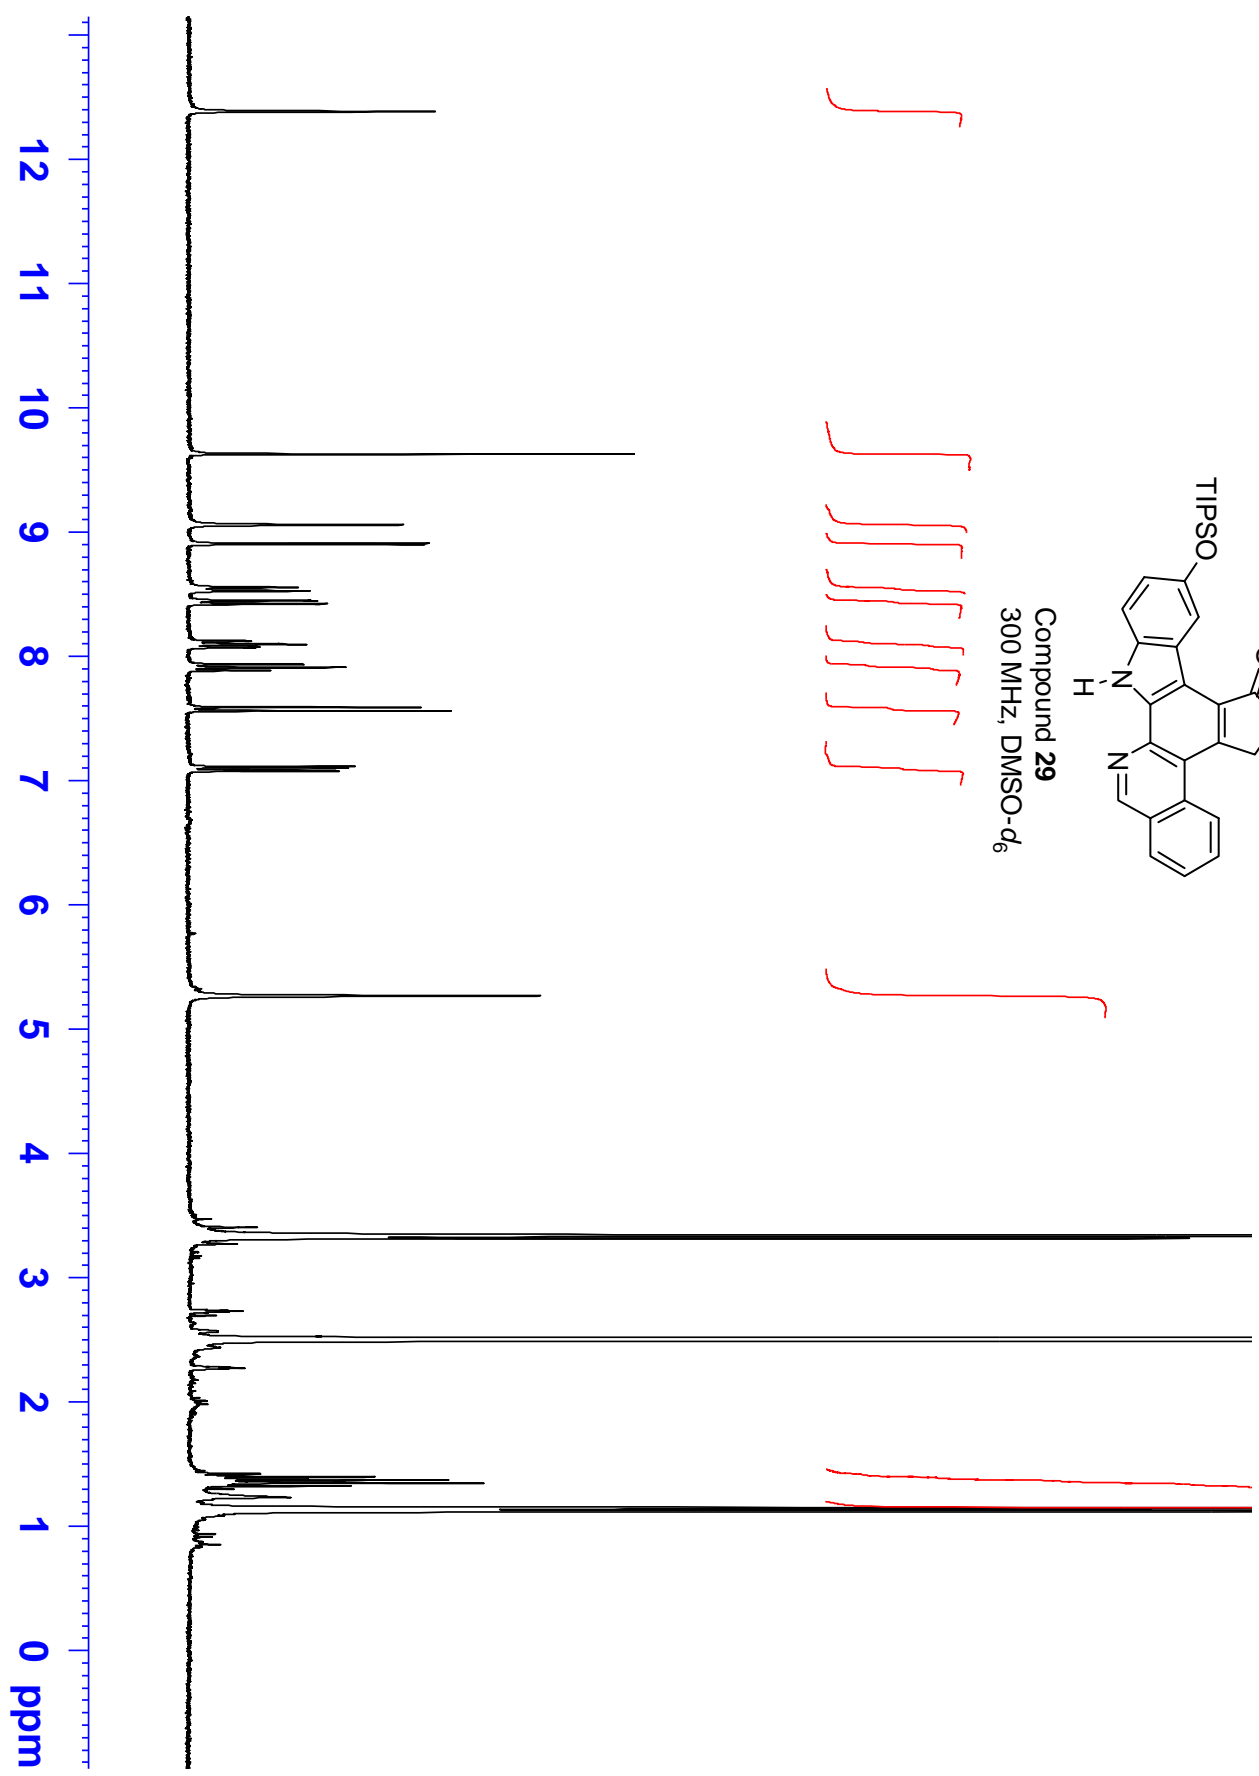

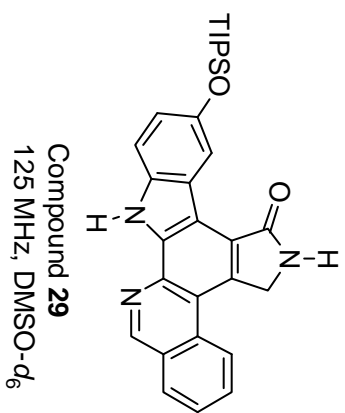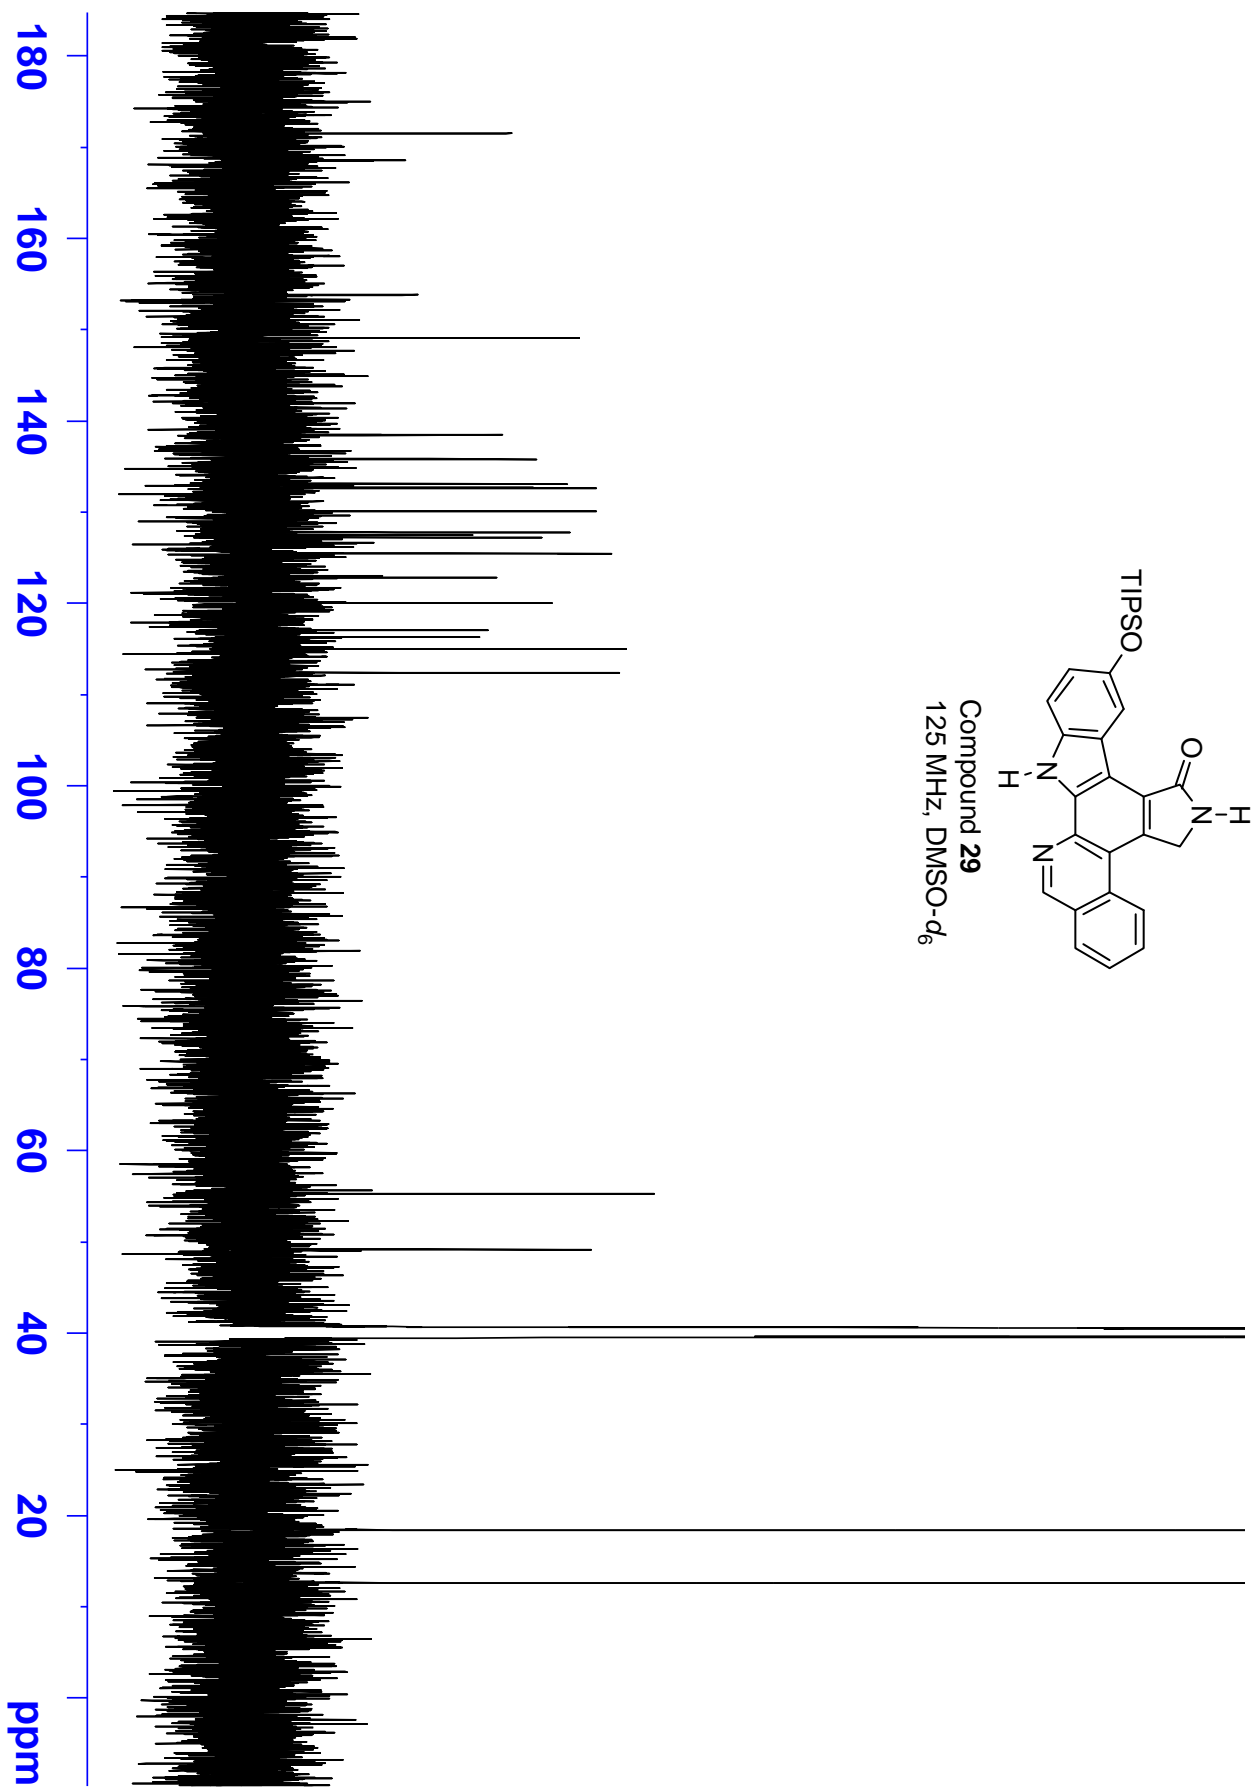

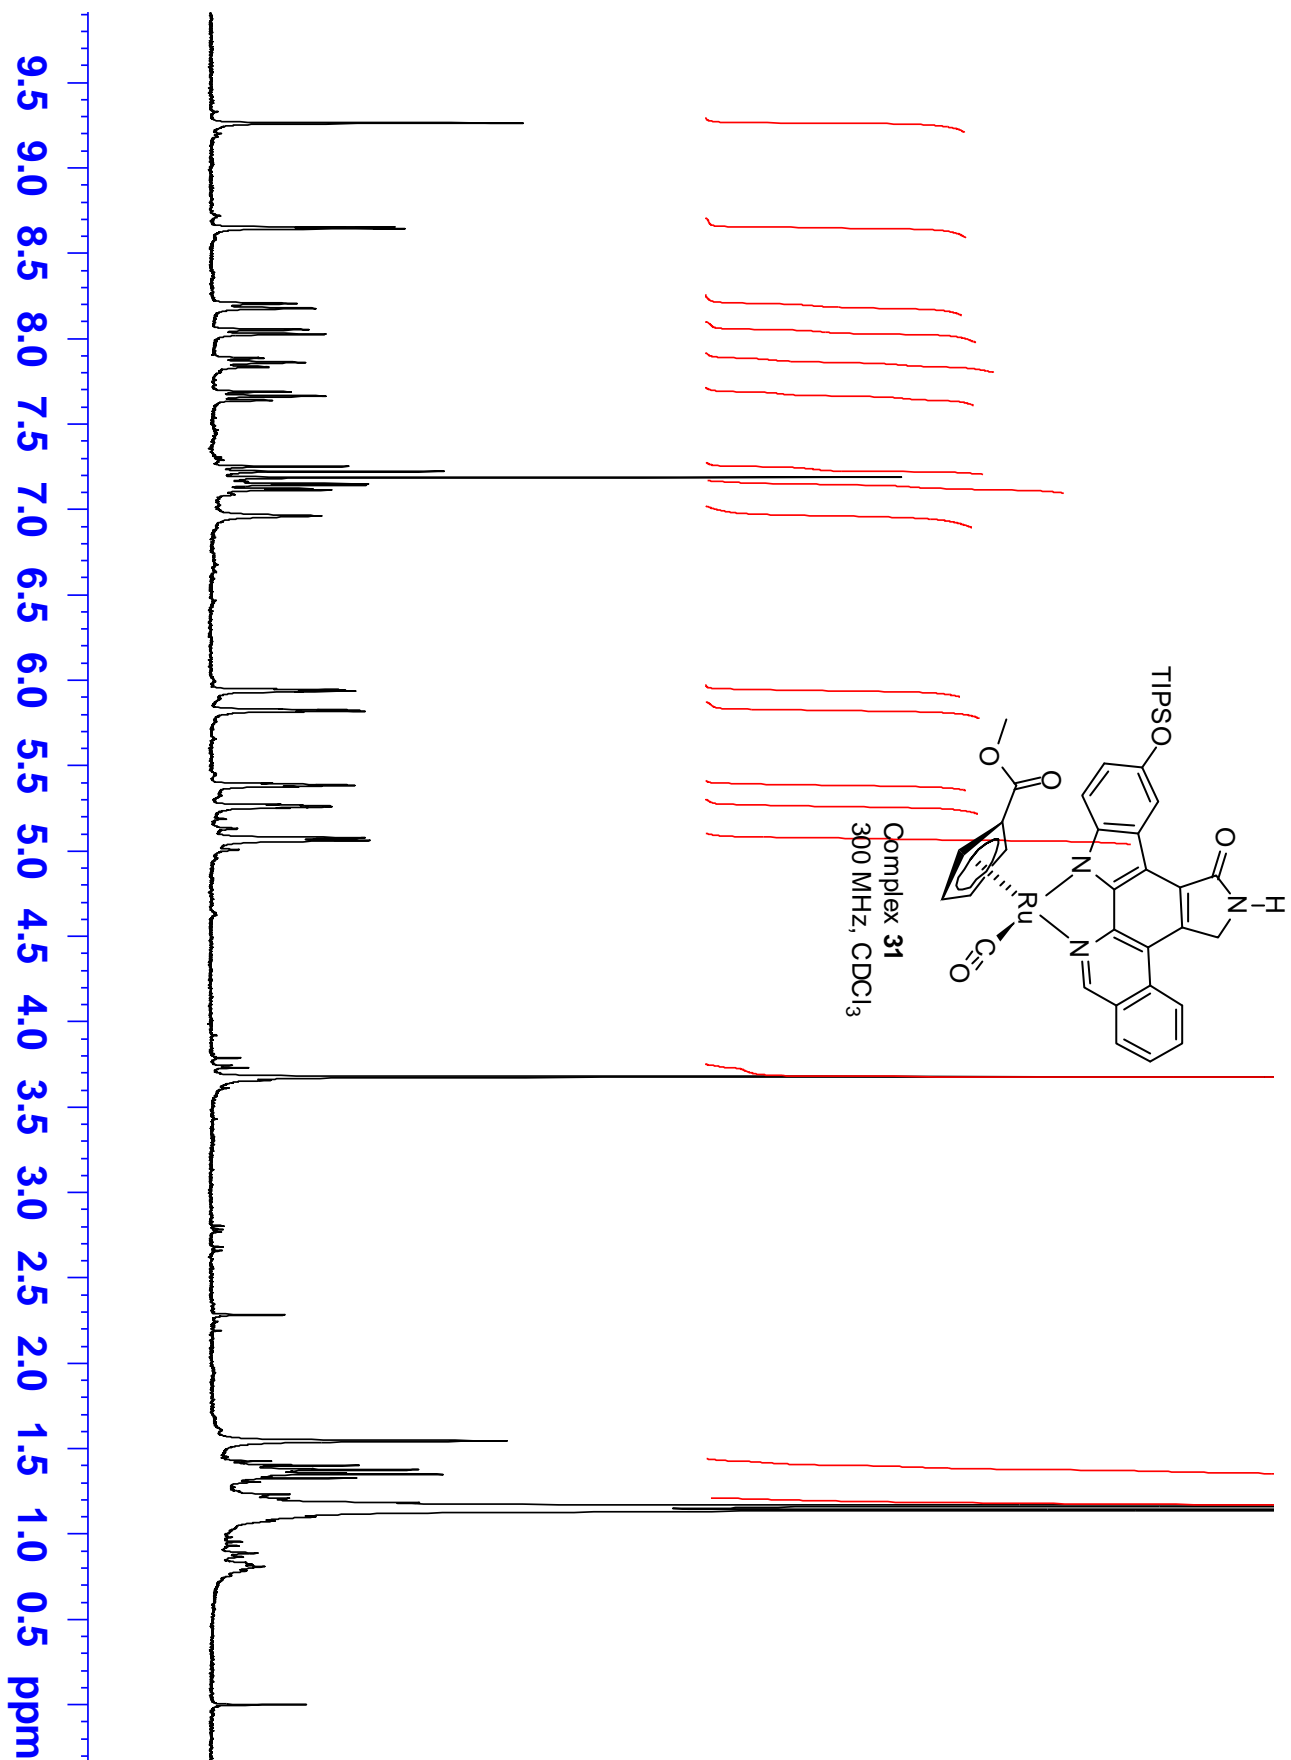



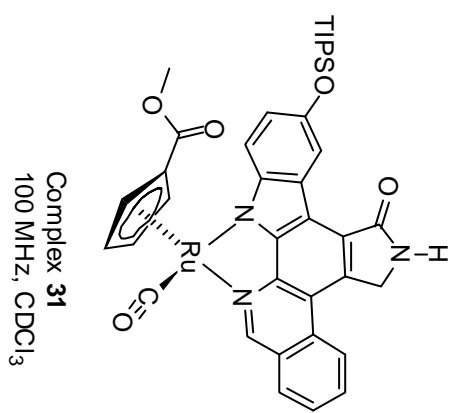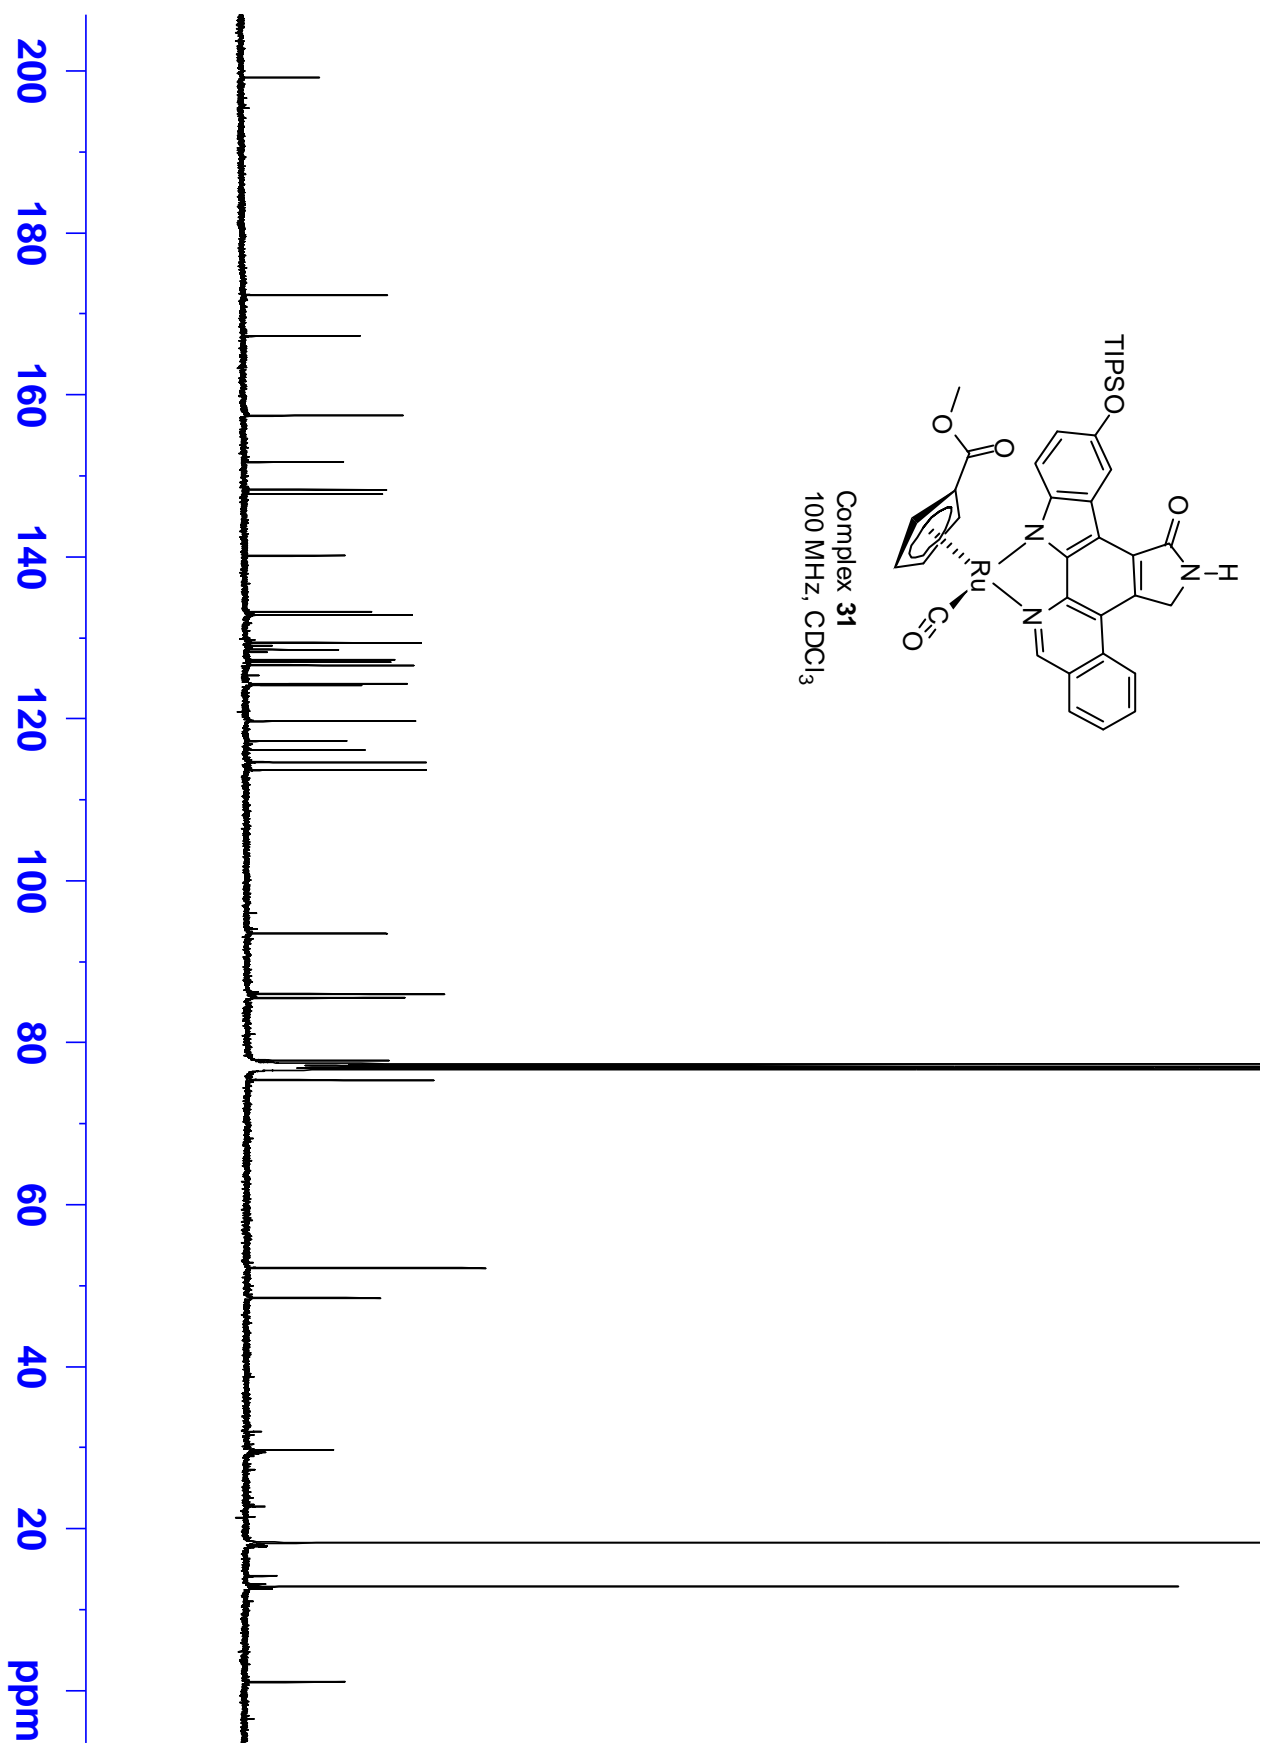

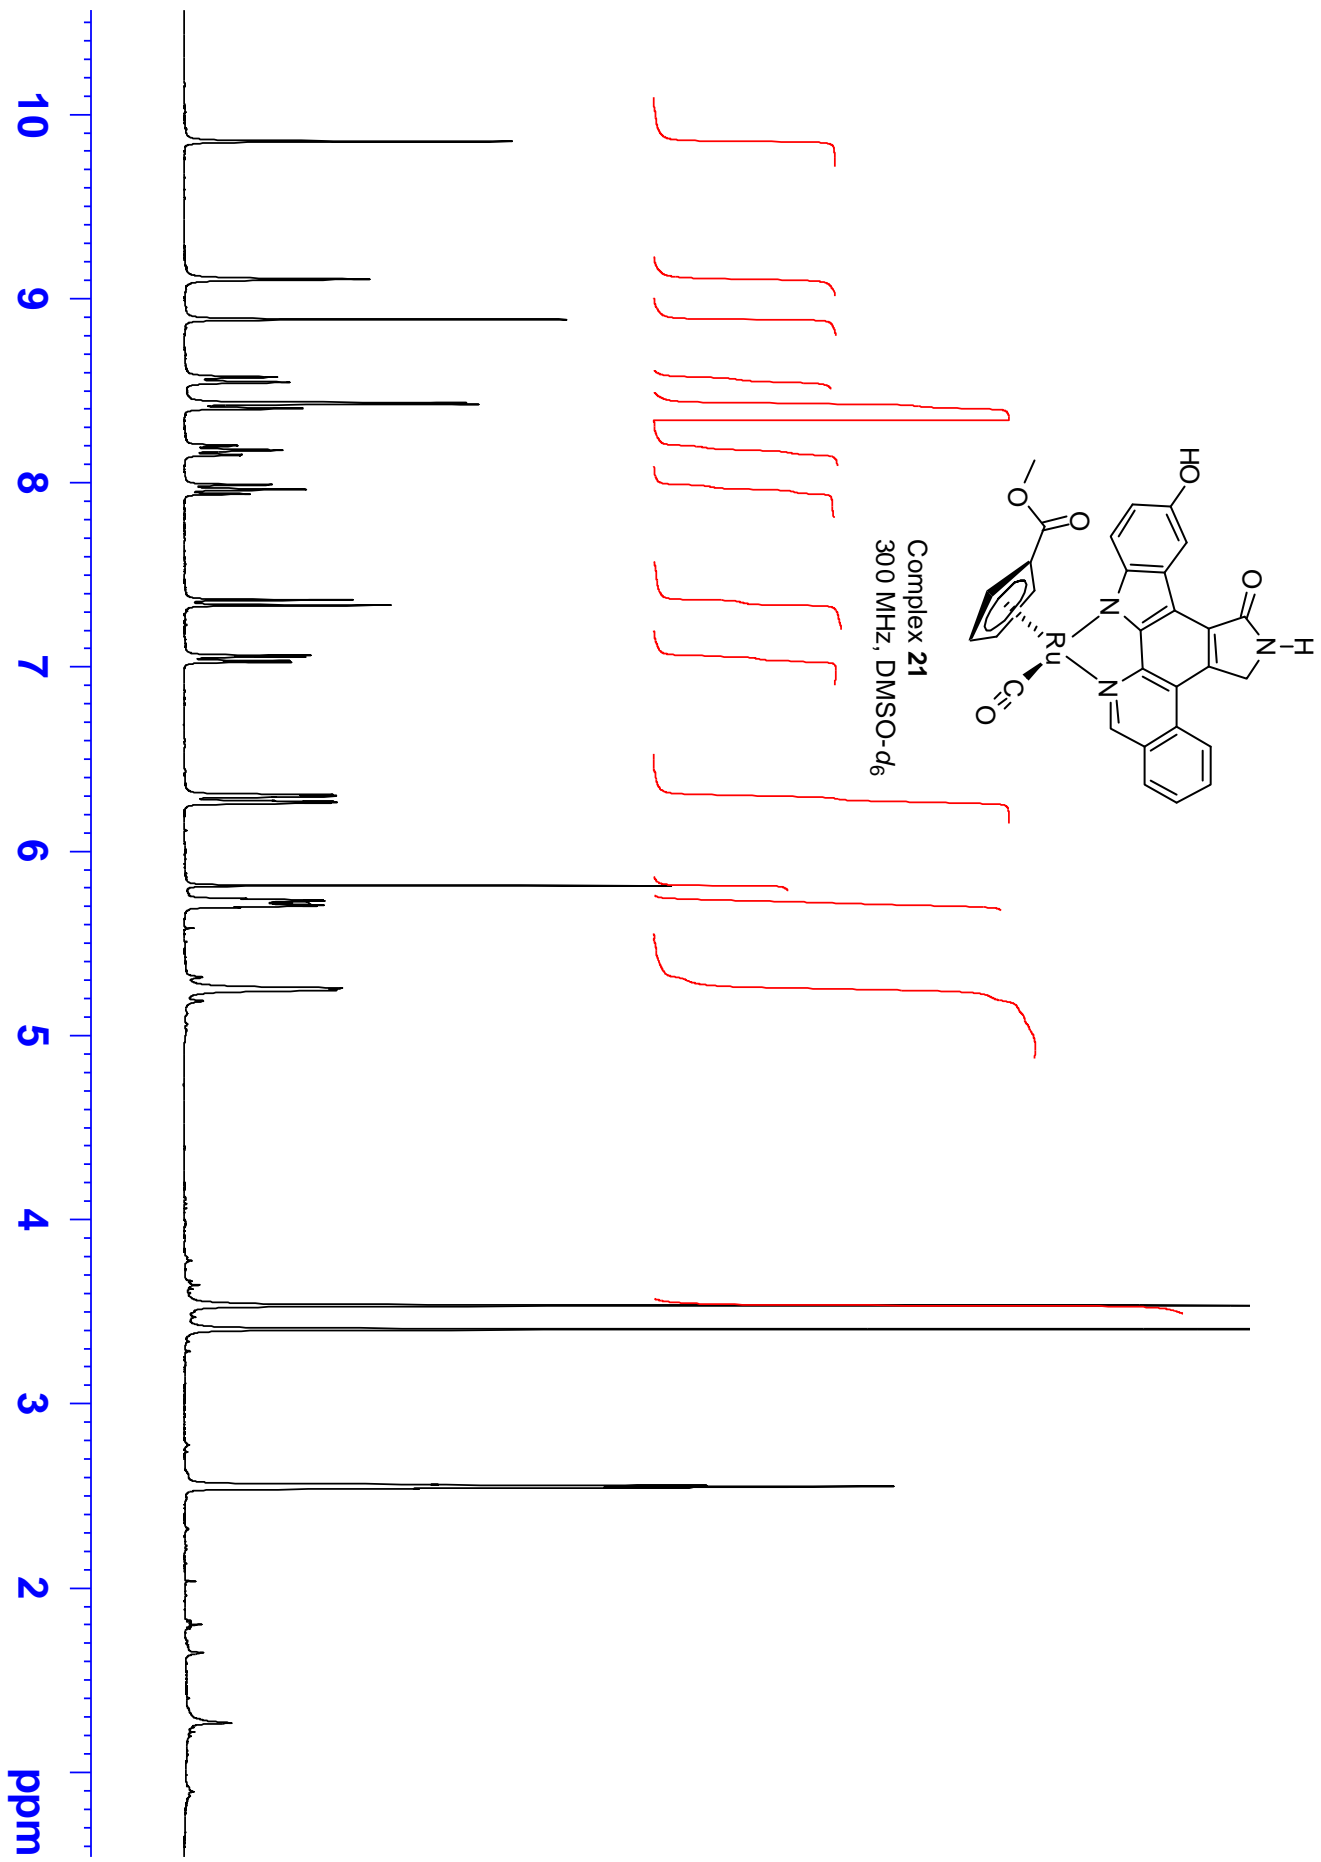

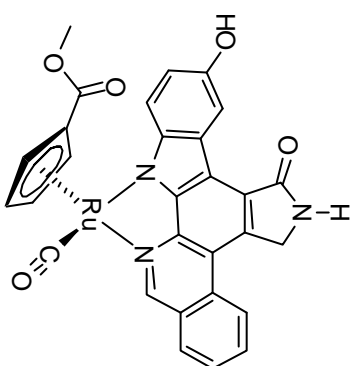

Complex 21  
100 MHz, DMSO- $d_6$

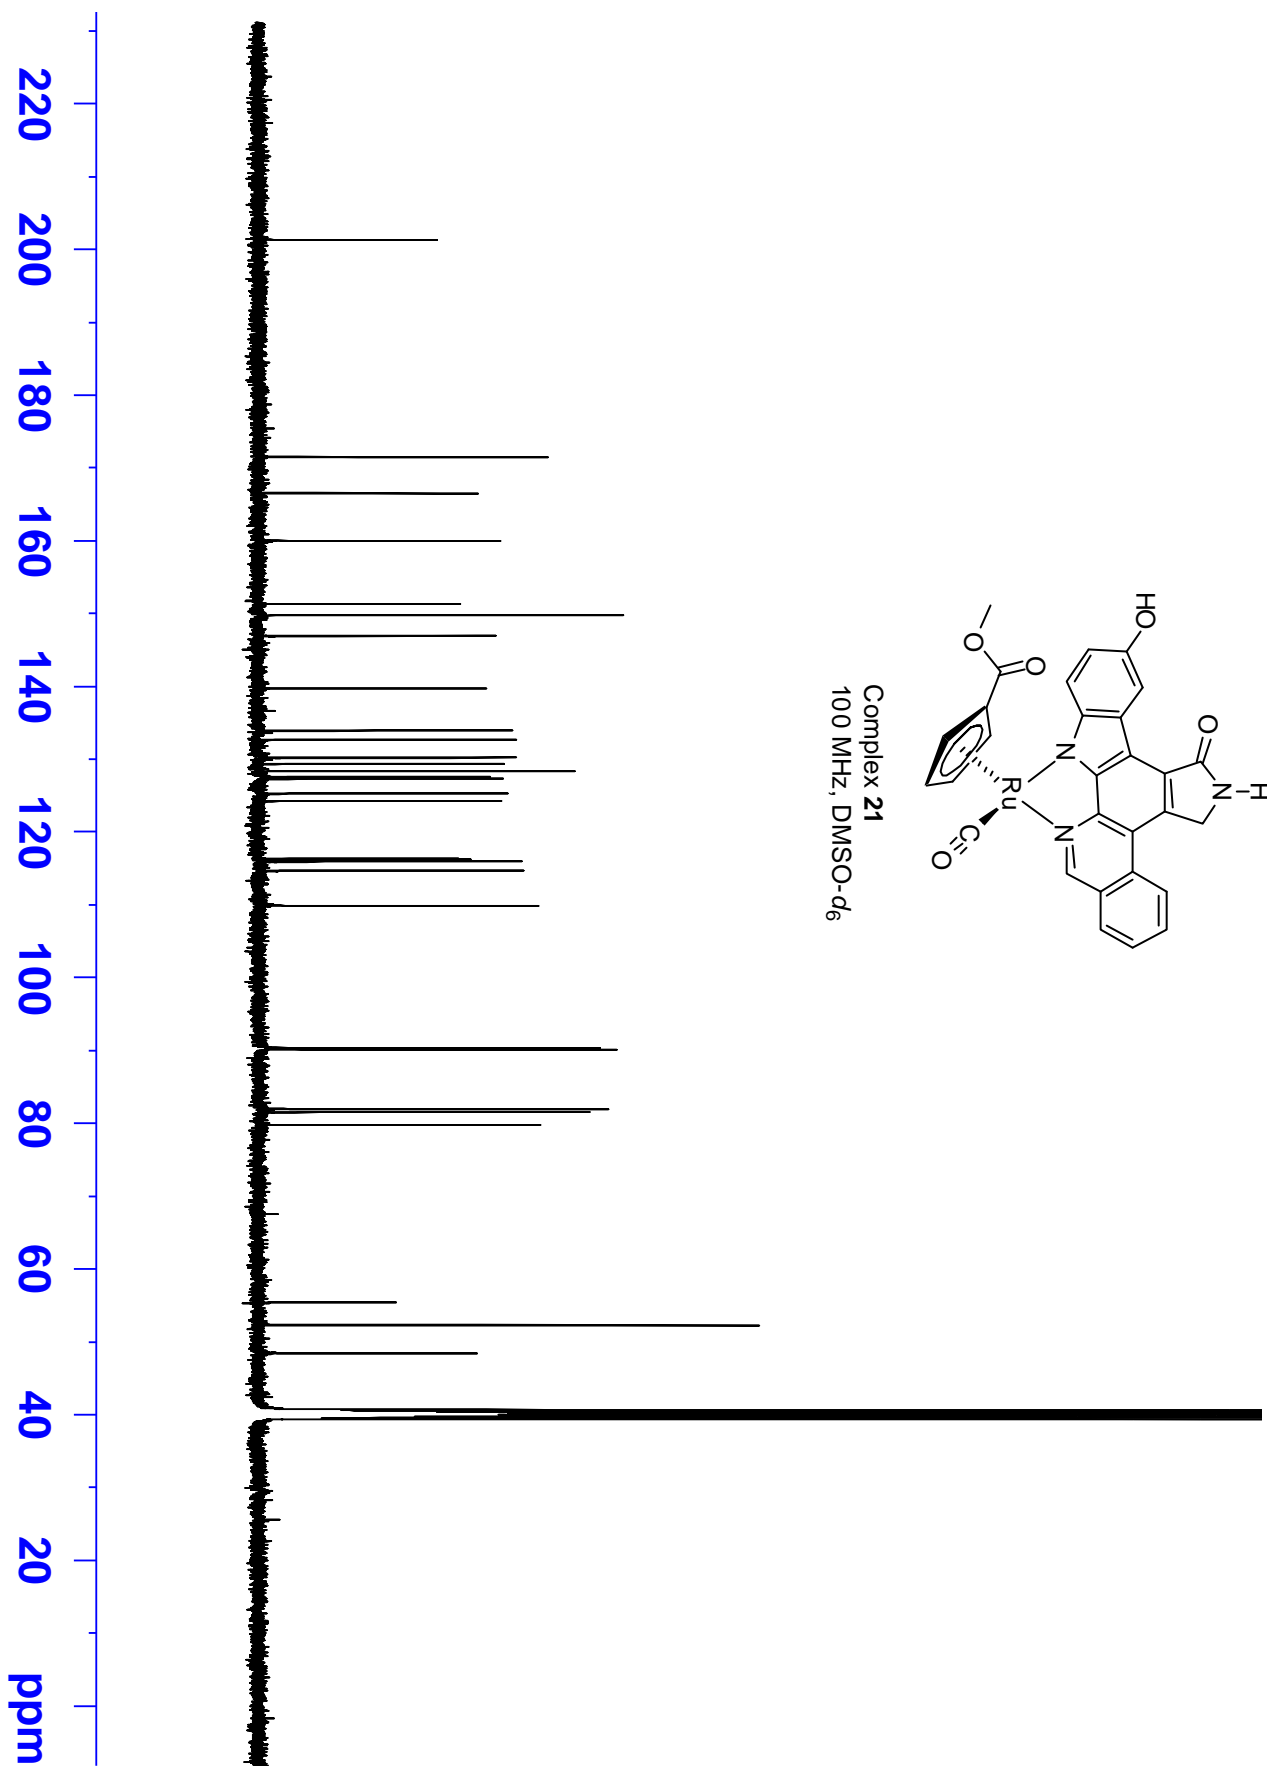

Supplement: NIHMS157146-supplement-1_si_001.pdf [file NIHMS157146-supplement-1_si_001.pdf]
